# Supplementary material for: Genomic Landscape and Clinical Utility in Korean Advanced Pan-Cancer Patients from Prospective Clinical Sequencing: K-MASTER Program
Source: Oxford University Press journal article supplement (doi:10.1158/2159-8290.cd-21-1064), 2021-12-03
Supplement: cd-21-1064_table_s2_suppst2.xlsx [file cd-21-1064_table_s2_suppst2.xlsx]

## Sheet: Mutation_cancertype_final
gene_sym	tumor_type	tumor_type_mut	tumor_type_wt	tumor_type_mut_percentage	others_mut	others_wt	delta_difference	pvalue	fdr
APC	Colorectal_Adenocarcinoma	591	390	60.2446	287	2760	50.8255	5.82207e-220	1.09408e-215
KRAS	Colorectal_Adenocarcinoma	433	548	44.1386	278	2769	35.0149	6.93127e-121	1.30246e-116
PIK3CA	Breast_Adenocarcinoma	218	384	36.2126	440	2986	23.3697	3.72852e-39	7.00589e-35
KRAS	Breast_Adenocarcinoma	13	589	2.15947	698	2728	-18.2141	3.21718e-37	6.04476e-33
TP53	Colorectal_Adenocarcinoma	634	347	64.6279	1303	1744	21.8646	6.40396e-33	1.20318e-28
KRAS	Pancreatic_Adenocarcinoma	78	39	66.6667	633	3278	50.4815	9.4301e-33	1.77163e-28
CDH1	Gastric_Adenocarcinoma	79	351	18.3721	122	3476	14.9813	3.70691e-28	6.96381e-24
VHL	Renal_Cell_Carcinoma	20	31	39.2157	30	3947	38.4613	5.90205e-27	1.1087e-22
TP53	Sarcoma	62	250	19.8718	1875	1841	-30.5857	7.81439e-27	1.46785e-22
FBXW7	Colorectal_Adenocarcinoma	135	846	13.7615	136	2911	9.29806	5.2004e-21	9.76791e-17
APC	Sarcoma	16	296	5.12821	862	2854	-18.0688	4.10302e-17	7.7063e-13
FOXA1	Prostate_Adenocarcinoma	17	42	28.8136	57	3912	27.3774	6.85157e-17	1.28679e-12
SMAD4	Colorectal_Adenocarcinoma	140	841	14.2712	171	2876	8.65907	1.06482e-16	1.99974e-12
EGFR	Lung_Adenocarcinoma	37	173	17.619	114	3704	14.6332	2.35136e-16	4.41561e-12
ATRX	Colorectal_Adenocarcinoma	44	937	4.48522	401	2646	-8.67527	4.18449e-16	7.85764e-12
KRAS	Sarcoma	10	302	3.20513	701	3015	-15.6592	5.8594e-16	1.10022e-11
KRAS	Head_Neck_Carcinoma	3	223	1.32743	708	3094	-17.2943	9.37712e-16	1.76065e-11
APC	Breast_Adenocarcinoma	63	539	10.4651	815	2611	-13.3236	7.30016e-15	1.3706e-10
KMT2D	Urothelial_Carcinoma	52	103	33.5484	391	3482	23.4529	1.3423e-14	2.52003e-10
GATA3	Breast_Adenocarcinoma	43	559	7.14286	46	3380	5.80018	4.71722e-14	8.85563e-10
ARID1A	Gastric_Adenocarcinoma	103	327	23.9535	373	3225	13.5866	5.51822e-14	1.03588e-09
MAP3K4	Colorectal_Adenocarcinoma	21	960	2.14067	0	3047	2.14067	1.11488e-13	2.09274e-09
KRAS	Gastric_Adenocarcinoma	26	404	6.04651	685	2913	-12.9918	2.09059e-13	3.92403e-09
LRP1B	Colorectal_Adenocarcinoma	70	911	7.13558	476	2571	-8.48635	1.00558e-12	1.88736e-08
KDM6A	Colorectal_Adenocarcinoma	76	905	7.7472	75	2972	5.28576	2.35207e-12	4.41436e-08
TP63	Colorectal_Adenocarcinoma	17	964	1.73293	0	3047	1.73293	3.35728e-11	6.3006e-07
TP53	Melanoma	5	54	8.47458	1932	2037	-40.2027	5.59276e-11	1.04954e-06
CDH1	Colorectal_Adenocarcinoma	14	967	1.42712	187	2860	-4.71007	6.21439e-11	1.16613e-06
APC	Gastric_Adenocarcinoma	45	385	10.4651	833	2765	-12.6866	1.348e-10	2.52938e-06
ERCC2	Urothelial_Carcinoma	21	134	13.5484	83	3790	11.4053	1.68828e-10	3.16773e-06
KMT2A	Colorectal_Adenocarcinoma	39	942	3.97554	304	2743	-6.00149	4.2646e-10	8.00125e-06
CBFB	Breast_Adenocarcinoma	27	575	4.48505	27	3399	3.69696	1.07749e-09	2.02147e-05
PIK3R1	Endometrial_Carcinoma	13	34	27.6596	133	3848	24.3187	5.32502e-09	9.98974e-05
TP53	Cervical_Carcinoma	5	45	10	1932	2046	-38.5671	1.08786e-08	0.000204071
APC	Pancreatic_Adenocarcinoma	4	113	3.4188	874	3037	-18.9284	1.94051e-08	0.000364
PKHD1	Colorectal_Adenocarcinoma	45	936	4.58716	307	2740	-5.48833	2.56439e-08	0.000481003
PTEN	Endometrial_Carcinoma	15	32	31.9149	220	3761	26.3886	2.78927e-08	0.000523155
LRP1B	Lung_Adenocarcinoma	58	152	27.619	488	3330	14.8375	3.39917e-08	0.000637514
PIK3CA	Sarcoma	20	292	6.41026	638	3078	-10.7587	6.93038e-08	0.00129972
PPP2R2A	Colorectal_Adenocarcinoma	40	941	4.07747	36	3011	2.89598	9.17374e-08	0.00172035
APC	Ovarian_Carcinoma	22	219	9.12863	856	2931	-13.475	1.23682e-07	0.00231928
BRAF	Thyroid_Carcinoma	8	5	61.5385	232	3783	55.7601	1.40645e-07	0.00263724
NSD1	Colorectal_Adenocarcinoma	23	958	2.34455	194	2853	-4.02237	2.20709e-07	0.00413829
NCOR1	Colorectal_Adenocarcinoma	30	951	3.0581	227	2820	-4.39185	2.47584e-07	0.00464195
SPEN	Colorectal_Adenocarcinoma	32	949	3.26198	235	2812	-4.45053	2.76347e-07	0.00518095
TP53	Renal_Cell_Carcinoma	7	44	13.7255	1930	2047	-34.8036	2.81432e-07	0.00527601
FGFR3	Urothelial_Carcinoma	17	138	10.9677	92	3781	8.59232	5.68853e-07	0.0106637
PIK3CA	Cervical_Carcinoma	23	27	46	635	3343	30.0372	7.32381e-07	0.0137285
MAP3K1	Breast_Adenocarcinoma	52	550	8.63787	127	3299	4.93093	8.26544e-07	0.0154927
ERCC6	Colorectal_Adenocarcinoma	6	975	0.611621	96	2951	-2.53902	9.87644e-07	0.0185114
BRCA1	Ovarian_Carcinoma	38	203	15.7676	239	3548	9.45657	1.0207e-06	0.0191299
MED12	Colorectal_Adenocarcinoma	23	958	2.34455	185	2862	-3.727	1.15432e-06	0.0216332
SMAD4	Sarcoma	5	307	1.60256	306	3410	-6.6321	1.34724e-06	0.0252472
BRAF	Colorectal_Adenocarcinoma	91	890	9.27625	149	2898	4.38619	1.79287e-06	0.0335965
STAG2	Colorectal_Adenocarcinoma	20	961	2.03874	167	2880	-3.44206	1.95624e-06	0.0366561
CIC	Gastric_Adenocarcinoma	46	384	10.6977	170	3428	5.97283	2.29811e-06	0.0430597
BCOR	Colorectal_Adenocarcinoma	21	960	2.14067	171	2876	-3.4714	2.55551e-06	0.0478801
LRP6	Colorectal_Adenocarcinoma	21	960	2.14067	171	2876	-3.4714	2.55551e-06	0.0478801
SF3B1	Breast_Adenocarcinoma	44	558	7.30897	104	3322	4.27336	2.83351e-06	0.0530829
PAK2	Colorectal_Adenocarcinoma	9	972	0.917431	0	3047	0.917431	2.93168e-06	0.0549192
STAT6	Colorectal_Adenocarcinoma	9	972	0.917431	0	3047	0.917431	2.93168e-06	0.0549192
TSC2	Colorectal_Adenocarcinoma	32	949	3.26198	30	3017	2.2774	3.38486e-06	0.0634019
APC	Head_Neck_Carcinoma	23	203	10.177	855	2947	-12.3112	4.11239e-06	0.0770252
ERCC4	Breast_Adenocarcinoma	27	575	4.48505	48	3378	3.084	4.43886e-06	0.0831354
SPOP	Prostate_Adenocarcinoma	8	51	13.5593	60	3909	12.0476	4.85596e-06	0.0909423
CDK12	Prostate_Adenocarcinoma	13	46	22.0339	192	3777	17.1964	5.33037e-06	0.0998218
TGFBR2	Colorectal_Adenocarcinoma	3	978	0.30581	70	2977	-1.99153	5.64782e-06	0.105761
CDKN2A	Cholangiocarcinoma	18	137	11.6129	124	3749	8.41125	5.82603e-06	0.109092
ARID2	Colorectal_Adenocarcinoma	36	945	3.66972	231	2816	-3.9115	8.29161e-06	0.155252
FAT1	Colorectal_Adenocarcinoma	29	952	2.95617	199	2848	-3.57485	1.06397e-05	0.199208
TET2	Colorectal_Adenocarcinoma	26	955	2.65036	186	2861	-3.45401	1.09996e-05	0.205934
CDKN2A	Pancreatic_Adenocarcinoma	15	102	12.8205	127	3784	9.57326	1.10964e-05	0.207736
PTPRD	Lung_Adenocarcinoma	29	181	13.8095	212	3606	8.25688	1.51702e-05	0.283986
PIK3CB	Breast_Adenocarcinoma	35	567	5.81395	80	3346	3.47887	1.56585e-05	0.293111
GATA3	Colorectal_Adenocarcinoma	6	975	0.611621	83	2964	-2.11237	1.64631e-05	0.308157
KRAS	Prostate_Adenocarcinoma	0	59	0	711	3258	-17.9138	1.66165e-05	0.311012
MED12	Endometrial_Carcinoma	11	36	23.4043	197	3784	18.4557	1.80021e-05	0.336928
ZNF609	Endometrial_Carcinoma	4	43	8.51064	11	3970	8.23433	2.02283e-05	0.378573
CIC	Colorectal_Adenocarcinoma	28	953	2.85423	188	2859	-3.31577	2.84631e-05	0.532659
SRSF2	Endometrial_Carcinoma	3	44	6.38298	3	3978	6.30762	2.90691e-05	0.543969
JPH4	Gastric_Adenocarcinoma	11	419	2.55814	15	3583	2.14124	3.14827e-05	0.589104
FAT3	Colorectal_Adenocarcinoma	78	903	7.95107	387	2660	-4.74995	3.36599e-05	0.62981
LARP4B	Gastric_Adenocarcinoma	7	423	1.62791	4	3594	1.51673	3.39421e-05	0.635057
SF3B1	Colorectal_Adenocarcinoma	16	965	1.63099	132	2915	-2.70114	3.47924e-05	0.650932
TP53	Ovarian_Carcinoma	147	94	60.9959	1790	1997	13.7289	3.561e-05	0.666192
CDKN2A	Colorectal_Adenocarcinoma	15	966	1.52905	127	2920	-2.63898	3.69745e-05	0.691682
TOP1	Colorectal_Adenocarcinoma	7	974	0.713558	85	2962	-2.07607	3.90012e-05	0.729556
BAP1	Renal_Cell_Carcinoma	8	43	15.6863	97	3880	13.2473	4.10025e-05	0.766952
APC	Lung_Adenocarcinoma	23	187	10.9524	855	2963	-11.4415	4.70926e-05	0.88082
POLQ	Colorectal_Adenocarcinoma	77	904	7.84913	134	2913	3.45137	4.94533e-05	0.924925
MAPK8	Colorectal_Adenocarcinoma	7	974	0.713558	0	3047	0.713558	5.0004e-05	0.935175
HLA-DRB1	Lung_Adenocarcinoma	11	199	5.2381	41	3777	4.16423	5.42673e-05	1
NRAS	Melanoma	8	51	13.5593	86	3883	11.3925	5.43718e-05	1
TP53	Prostate_Adenocarcinoma	13	46	22.0339	1924	2045	-26.4418	5.71945e-05	1
SUZ12	Colorectal_Adenocarcinoma	4	977	0.407747	67	2980	-1.79114	6.22231e-05	1
PTEN	Breast_Adenocarcinoma	58	544	9.63455	177	3249	4.46818	6.29671e-05	1
IGF2R	Colorectal_Adenocarcinoma	25	956	2.54842	168	2879	-2.9652	7.13604e-05	1
DDX27	Gastric_Adenocarcinoma	11	419	2.55814	17	3581	2.08565	7.17104e-05	1
PTPRD	Colorectal_Adenocarcinoma	34	947	3.46585	207	2840	-3.32772	7.26894e-05	1
C11orf30	Colorectal_Adenocarcinoma	30	951	3.0581	33	3014	1.97507	7.64362e-05	1
TP53	Adrenal_Carcinoma	4	26	13.3333	1933	2065	-35.0158	7.6447e-05	1
DNMT1	Colorectal_Adenocarcinoma	14	967	1.42712	119	2928	-2.47837	7.7682e-05	1
EPHA3	Lung_Adenocarcinoma	24	186	11.4286	171	3647	6.94979	7.77988e-05	1
CBFB	Colorectal_Adenocarcinoma	2	979	0.203874	52	2995	-1.50272	7.94937e-05	1
AKT1	Breast_Adenocarcinoma	26	576	4.31894	54	3372	2.74275	8.48927e-05	1
IDH1	Cholangiocarcinoma	11	144	7.09677	63	3810	5.47013	9.86114e-05	1
ACVR1B	Others	4	74	5.12821	10	3940	4.87504	0.000112445	1
SPEN	Breast_Adenocarcinoma	63	539	10.4651	204	3222	4.51065	0.000117598	1
CDK8	Breast_Adenocarcinoma	20	582	3.32226	37	3389	2.24228	0.000118184	1
WEE1	Endometrial_Carcinoma	5	42	10.6383	38	3943	9.68376	0.000120222	1
CHUK	Colorectal_Adenocarcinoma	10	971	1.01937	95	2952	-2.09845	0.000124403	1
ERBB2	Sarcoma	2	310	0.641026	172	3544	-3.98761	0.000126794	1
KRAS	Urothelial_Carcinoma	11	144	7.09677	700	3173	-10.9771	0.000152879	1
FGF10	Lung_Adenocarcinoma	9	201	4.28571	31	3787	3.47377	0.000159275	1
BRAF	Sarcoma	5	307	1.60256	235	3481	-4.72144	0.000160354	1
PBRM1	Sarcoma	5	307	1.60256	237	3479	-4.77526	0.000160718	1
SLC3A2	Gastric_Adenocarcinoma	8	422	1.86047	9	3589	1.61033	0.000160811	1
CREBBP	Urothelial_Carcinoma	24	131	15.4839	258	3615	8.82237	0.000160993	1
PBRM1	Renal_Cell_Carcinoma	11	40	21.5686	231	3746	15.7602	0.000163201	1
BRCA1	Gastric_Adenocarcinoma	12	418	2.7907	265	3333	-4.57451	0.000163383	1
APC	Gallbladder_Cancer	4	70	5.40541	874	3080	-16.6988	0.000167115	1
ABCC3	Endometrial_Carcinoma	6	41	12.766	67	3914	11.083	0.000171708	1
SETD2	Renal_Cell_Carcinoma	13	38	25.4902	320	3657	17.4439	0.000176063	1
FLT1	Colorectal_Adenocarcinoma	19	962	1.9368	136	2911	-2.52661	0.000178772	1
EPHA6	Lung_Adenocarcinoma	22	188	10.4762	158	3660	6.3379	0.000180129	1
CARD11	Colorectal_Adenocarcinoma	8	973	0.815494	84	2963	-1.94132	0.000181384	1
SMAD4	Breast_Adenocarcinoma	25	577	4.15282	286	3140	-4.1951	0.000182828	1
ATR	Sarcoma	9	303	2.88462	311	3405	-5.4846	0.000184249	1
AR	Gastric_Adenocarcinoma	65	365	15.1163	328	3270	6.0001	0.000196069	1
ARID1A	Endometrial_Carcinoma	15	32	31.9149	461	3520	20.3349	0.000200845	1
AURKC	Colorectal_Adenocarcinoma	6	975	0.611621	0	3047	0.611621	0.000206273	1
IGFBP3	Colorectal_Adenocarcinoma	6	975	0.611621	0	3047	0.611621	0.000206273	1
RHEB	Colorectal_Adenocarcinoma	6	975	0.611621	0	3047	0.611621	0.000206273	1
ARID1B	Colorectal_Adenocarcinoma	30	951	3.0581	184	2863	-2.98062	0.000210177	1
APC	Cholangiocarcinoma	16	139	10.3226	862	3011	-11.9341	0.000213883	1
NRAS	Colorectal_Adenocarcinoma	39	942	3.97554	55	2992	2.17048	0.000219215	1
SETBP1	Colorectal_Adenocarcinoma	19	962	1.9368	134	2913	-2.46097	0.00024129	1
ABCG2	Colorectal_Adenocarcinoma	3	978	0.30581	53	2994	-1.43361	0.000247516	1
PTCH2	Colorectal_Adenocarcinoma	7	974	0.713558	76	2971	-1.7807	0.000251736	1
CHD4	Endometrial_Carcinoma	9	38	19.1489	180	3801	14.6275	0.000263445	1
NCOR1	Breast_Adenocarcinoma	60	542	9.96678	197	3229	4.21663	0.000266905	1
TP53BP1	Prostate_Adenocarcinoma	8	51	13.5593	110	3859	10.7878	0.000271713	1
ACVR2A	Gastric_Adenocarcinoma	13	417	3.02326	29	3569	2.21725	0.000272096	1
TEAD2	Gastric_Adenocarcinoma	10	420	2.32558	17	3581	1.8531	0.00027308	1
KAT6A	Colorectal_Adenocarcinoma	30	951	3.0581	182	2865	-2.91498	0.000273261	1
ROBO1	Thymic_Carcinoma	4	16	20	63	3945	18.4281	0.000277289	1
ZNF703	Head_Neck_Carcinoma	4	222	1.76991	3	3799	1.69101	0.000295457	1
CDKN2A	Head_Neck_Carcinoma	19	207	8.40708	123	3679	5.17194	0.000297685	1
ARID1A	Urothelial_Carcinoma	34	121	21.9355	442	3431	10.5231	0.000301664	1
EPHA3	Colorectal_Adenocarcinoma	27	954	2.75229	168	2879	-2.76133	0.000301973	1
BMPR2	Colorectal_Adenocarcinoma	9	972	0.917431	3	3044	0.818974	0.000309505	1
CHD1	Breast_Adenocarcinoma	20	582	3.32226	40	3386	2.15472	0.000319097	1
BRCA1	Breast_Adenocarcinoma	63	539	10.4651	214	3212	4.21876	0.000322835	1
BRIP1	Ovarian_Carcinoma	24	217	9.95851	161	3626	5.70712	0.000325455	1
SMO	Colorectal_Adenocarcinoma	5	976	0.509684	64	2983	-1.59074	0.000328939	1
KMT2A	Breast_Adenocarcinoma	75	527	12.4585	268	3158	4.63594	0.000342817	1
SMARCA1	Colorectal_Adenocarcinoma	21	960	2.14067	141	2906	-2.48683	0.000350837	1
IKBKE	Breast_Adenocarcinoma	16	586	2.65781	28	3398	1.84053	0.000354865	1
FBXW7	Sarcoma	7	305	2.24359	264	3452	-4.86082	0.000356141	1
TTF1	Colorectal_Adenocarcinoma	6	975	0.611621	70	2977	-1.68572	0.000358702	1
RAF1	Colorectal_Adenocarcinoma	9	972	0.917431	85	2962	-1.8722	0.000359805	1
JUN	Colorectal_Adenocarcinoma	12	969	1.22324	7	3040	0.993507	0.000360773	1
FGFR2	Endometrial_Carcinoma	7	40	14.8936	111	3870	12.1054	0.000368616	1
FGF9	Breast_Adenocarcinoma	5	597	0.830565	1	3425	0.801376	0.000386548	1
ROS1	Ovarian_Carcinoma	34	207	14.1079	275	3512	6.8462	0.000390692	1
PLCG1	Colorectal_Adenocarcinoma	17	964	1.73293	122	2925	-2.27101	0.000396328	1
CHAT	Endometrial_Carcinoma	2	45	4.25532	1	3980	4.2302	0.000396878	1
MYO1A	Gastric_Adenocarcinoma	8	422	1.86047	11	3587	1.55474	0.00041196	1
DNMT3A	Endometrial_Carcinoma	7	40	14.8936	114	3867	12.03	0.000429947	1
LRP1B	Gastric_Adenocarcinoma	83	347	19.3023	463	3135	6.43407	0.00043439	1
KRAS	Ovarian_Carcinoma	23	218	9.54357	688	3099	-8.62385	0.000450511	1
TFRC	Colorectal_Adenocarcinoma	4	977	0.407747	58	2989	-1.49576	0.000458044	1
SLC29A1	Endometrial_Carcinoma	4	43	8.51064	28	3953	7.8073	0.000460741	1
DOT1L	Head_Neck_Carcinoma	17	209	7.52212	107	3695	4.70782	0.000466158	1
APC	Urothelial_Carcinoma	17	138	10.9677	861	3012	-11.2631	0.000479886	1
PTCH1	Colorectal_Adenocarcinoma	15	966	1.52905	113	2934	-2.17951	0.000487824	1
EPHA6	Colorectal_Adenocarcinoma	25	956	2.54842	155	2892	-2.53855	0.000506203	1
SRPR	Endometrial_Carcinoma	4	43	8.51064	29	3952	7.78218	0.00051983	1
FAT3	Lung_Adenocarcinoma	41	169	19.5238	424	3394	8.41852	0.000519919	1
KDM6A	Lung_Adenocarcinoma	0	210	0	151	3667	-3.95495	0.000520422	1
EML4	Lung_Adenocarcinoma	12	198	5.71429	65	3753	4.01182	0.000534935	1
PIK3CA	Melanoma	1	58	1.69492	657	3312	-14.8584	0.000548894	1
RB1	Urothelial_Carcinoma	24	131	15.4839	281	3592	8.22851	0.000552137	1
CFTR	Urothelial_Carcinoma	4	151	2.58065	7	3866	2.39991	0.000563431	1
SMAD4	Pancreatic_Adenocarcinoma	20	97	17.094	291	3620	9.65346	0.000585231	1
RSF1	Endometrial_Carcinoma	7	40	14.8936	121	3860	11.8542	0.000605179	1
INSR	Colorectal_Adenocarcinoma	12	969	1.22324	96	2951	-1.9274	0.000607879	1
KIT	Renal_Cell_Carcinoma	9	42	17.6471	186	3791	12.9702	0.000628702	1
TSC1	Renal_Cell_Carcinoma	8	43	15.6863	148	3829	11.9649	0.000651432	1
HGF	Lung_Adenocarcinoma	16	194	7.61905	109	3709	4.76415	0.00065862	1
MAP2K7	Gastric_Adenocarcinoma	38	392	8.83721	168	3430	4.16795	0.00067192	1
APC	Melanoma	3	56	5.08475	875	3094	-16.9611	0.000682719	1
PIK3CD	Endometrial_Carcinoma	5	42	10.6383	57	3924	9.2065	0.000684838	1
NCOA3	Colorectal_Adenocarcinoma	20	961	2.03874	133	2914	-2.32621	0.000707374	1
SEC31A	Gastric_Adenocarcinoma	9	421	2.09302	16	3582	1.64833	0.000707675	1
TGFBR2	Gastric_Adenocarcinoma	18	412	4.18605	55	3543	2.65742	0.00071582	1
NSD1	Endometrial_Carcinoma	9	38	19.1489	208	3773	13.9241	0.000733184	1
ERBB3	Gastric_Adenocarcinoma	34	396	7.90698	146	3452	3.84917	0.00073712	1
AXIN1	Endometrial_Carcinoma	5	42	10.6383	58	3923	9.18138	0.000737425	1
XPOT	Endometrial_Carcinoma	3	44	6.38298	13	3968	6.05643	0.000749777	1
PARP4	Breast_Adenocarcinoma	31	571	5.1495	84	3342	2.69766	0.000751934	1
PIK3R1	Colorectal_Adenocarcinoma	19	962	1.9368	127	2920	-2.23123	0.000776871	1
KRAS	Cholangiocarcinoma	44	111	28.3871	667	3206	11.1653	0.000777299	1
PPARG	Endometrial_Carcinoma	4	43	8.51064	33	3948	7.6817	0.000810825	1
SQSTM1	Colorectal_Adenocarcinoma	5	976	0.509684	0	3047	0.509684	0.000850242	1
TP53	Gallbladder_Cancer	50	24	67.5676	1887	2067	19.8437	0.000891006	1
PRRG1	Endometrial_Carcinoma	3	44	6.38298	14	3967	6.03131	0.000903014	1
ERBB4	Sarcoma	8	304	2.5641	264	3452	-4.54031	0.000930967	1
WRN	Colorectal_Adenocarcinoma	10	971	1.01937	84	2963	-1.73744	0.000954458	1
CDKN2B	Colorectal_Adenocarcinoma	11	970	1.1213	7	3040	0.891571	0.000957024	1
STAT4	Colorectal_Adenocarcinoma	10	971	1.01937	85	2962	-1.77026	0.000960407	1
CDK8	Colorectal_Adenocarcinoma	4	977	0.407747	53	2994	-1.33167	0.000961527	1
ATRX	Head_Neck_Carcinoma	41	185	18.1416	404	3398	7.51561	0.000975743	1
TP53BP1	Colorectal_Adenocarcinoma	14	967	1.42712	104	2943	-1.98608	0.000980117	1
U2AF2	Thymic_Carcinoma	2	18	10	8	4000	9.8004	0.00102934	1
HRAS	Others	5	73	6.41026	36	3914	5.49886	0.00103956	1
EPHB1	Colorectal_Adenocarcinoma	13	968	1.32518	98	2949	-1.8911	0.00105367	1
AMER1	Thymic_Carcinoma	3	17	15	39	3969	14.0269	0.00106251	1
RSF1	Colorectal_Adenocarcinoma	16	965	1.63099	112	2935	-2.04476	0.00107758	1
IGF2R	Head_Neck_Carcinoma	22	204	9.73451	171	3631	5.23688	0.00112469	1
RB1	Lung_Adenocarcinoma	29	181	13.8095	276	3542	6.58061	0.00115916	1
IGF1	Urothelial_Carcinoma	6	149	3.87097	26	3847	3.19965	0.00116341	1
NSD1	Head_Neck_Carcinoma	24	202	10.6195	193	3609	5.54319	0.00116468	1
STK11	Gallbladder_Cancer	6	68	8.10811	60	3894	6.59066	0.00118965	1
MAP2K2	Endometrial_Carcinoma	4	43	8.51064	37	3944	7.58122	0.00120155	1
PRKDC	Thymic_Carcinoma	4	16	20	95	3913	17.6297	0.00122917	1
CBLB	Colorectal_Adenocarcinoma	11	970	1.1213	88	2959	-1.76678	0.00123841	1
KLF4	Thymic_Carcinoma	2	18	10	9	3999	9.77545	0.00125434	1
ADNP	Endometrial_Carcinoma	3	44	6.38298	16	3965	5.98107	0.00126589	1
MYO1A	Endometrial_Carcinoma	3	44	6.38298	16	3965	5.98107	0.00126589	1
APC	Others	6	72	7.69231	872	3078	-14.3836	0.00126729	1
JAK1	Endometrial_Carcinoma	7	40	14.8936	138	3843	11.4272	0.00127223	1
SUZ12	Endometrial_Carcinoma	5	42	10.6383	66	3915	8.98042	0.00127407	1
FBXW7	Ovarian_Carcinoma	5	236	2.07469	266	3521	-4.94934	0.00128654	1
PKHD1	Breast_Adenocarcinoma	74	528	12.2924	278	3148	4.17794	0.00128893	1
PIK3CA	Pancreatic_Adenocarcinoma	7	110	5.98291	651	3260	-10.6625	0.00130703	1
ACVR2A	Endometrial_Carcinoma	4	43	8.51064	38	3943	7.5561	0.00131675	1
MED12	Breast_Adenocarcinoma	48	554	7.97342	160	3266	3.30325	0.00131868	1
MAP3K13	Sarcoma	1	311	0.320513	119	3597	-2.88186	0.00136596	1
APC	Hepatocellular_Carcinoma	1	38	2.5641	877	3112	-19.4214	0.00136826	1
SLC29A1	Breast_Adenocarcinoma	12	590	1.99336	20	3406	1.40958	0.00141883	1
ARID1A	Colorectal_Adenocarcinoma	88	893	8.97044	388	2659	-3.7634	0.0014219	1
KMT2D	Breast_Adenocarcinoma	44	558	7.30897	399	3027	-4.33726	0.0014291	1
ASXL1	Colorectal_Adenocarcinoma	16	965	1.63099	109	2938	-1.9463	0.00144085	1
RNF43	Gastric_Adenocarcinoma	26	404	6.04651	106	3492	3.10043	0.00149525	1
CTCF	Colorectal_Adenocarcinoma	5	976	0.509684	57	2990	-1.36101	0.00150039	1
ERCC4	Colorectal_Adenocarcinoma	7	974	0.713558	68	2979	-1.51815	0.00154332	1
GEN1	Colorectal_Adenocarcinoma	7	974	0.713558	68	2979	-1.51815	0.00154332	1
XRCC3	Endometrial_Carcinoma	4	43	8.51064	40	3941	7.50587	0.00156997	1
RUNX1	Colorectal_Adenocarcinoma	6	975	0.611621	63	2984	-1.45599	0.00157491	1
KRAS	Melanoma	2	57	3.38983	709	3260	-14.4736	0.00161411	1
PML	Urothelial_Carcinoma	7	148	4.51613	39	3834	3.50916	0.0016488	1
SRPR	Gastric_Adenocarcinoma	10	420	2.32558	23	3575	1.68634	0.00166187	1
BCORL1	Endometrial_Carcinoma	7	40	14.8936	145	3836	11.2513	0.00167525	1
NCOA3	Endometrial_Carcinoma	7	40	14.8936	146	3835	11.2262	0.00174016	1
SETBP1	Endometrial_Carcinoma	7	40	14.8936	146	3835	11.2262	0.00174016	1
ACVR2A	Breast_Adenocarcinoma	0	602	0	42	3384	-1.22592	0.00174863	1
FANCG	Head_Neck_Carcinoma	9	217	3.9823	42	3760	2.87762	0.00180451	1
BLM	Breast_Adenocarcinoma	40	562	6.64452	128	3298	2.90838	0.00183948	1
PIK3CA	Cholangiocarcinoma	12	143	7.74194	646	3227	-8.93764	0.00184822	1
MSH3	Colorectal_Adenocarcinoma	21	960	2.14067	129	2918	-2.093	0.00186012	1
XPC	Colorectal_Adenocarcinoma	3	978	0.30581	45	3002	-1.17105	0.00191067	1
TP53	Others	24	54	30.7692	1913	2037	-17.6611	0.00193012	1
PTGS2	Endometrial_Carcinoma	2	45	4.25532	4	3977	4.15484	0.00194043	1
CHUK	Breast_Adenocarcinoma	28	574	4.65116	77	3349	2.40364	0.00194744	1
IRF1	Endometrial_Carcinoma	3	44	6.38298	19	3962	5.90571	0.00196306	1
USP9X	Breast_Adenocarcinoma	24	578	3.98671	63	3363	2.14783	0.00201356	1
TYMS	Urothelial_Carcinoma	4	151	2.58065	11	3862	2.29663	0.00206549	1
NTRK2	Breast_Adenocarcinoma	30	572	4.98339	86	3340	2.47317	0.00206593	1
PKHD1	Ovarian_Carcinoma	35	206	14.5228	317	3470	6.15208	0.00206971	1
FANCM	Urothelial_Carcinoma	20	135	12.9032	237	3636	6.78394	0.00209581	1
BRAF	Melanoma	10	49	16.9492	230	3739	11.1542	0.00220222	1
CYP17A1	Head_Neck_Carcinoma	8	218	3.53982	35	3767	2.61925	0.00227755	1
NOTCH1	Endometrial_Carcinoma	8	39	17.0213	198	3783	12.0477	0.00228492	1
ABL2	Colorectal_Adenocarcinoma	17	964	1.73293	112	2935	-1.94282	0.00232099	1
UGT1A8	Endometrial_Carcinoma	4	43	8.51064	45	3936	7.38027	0.00234813	1
FAT1	Ovarian_Carcinoma	25	216	10.3734	203	3584	5.013	0.0023734	1
FANCA	Thymic_Carcinoma	4	16	20	115	3893	17.1307	0.00243173	1
MAP3K13	Endometrial_Carcinoma	6	41	12.766	114	3867	9.90236	0.00243798	1
UBR5	Gastric_Adenocarcinoma	8	422	1.86047	16	3582	1.41577	0.00247632	1
CASP8	Head_Neck_Carcinoma	12	214	5.30973	73	3729	3.38969	0.00248121	1
LRP6	Breast_Adenocarcinoma	44	558	7.30897	148	3278	2.98906	0.002506	1
WT1	Endometrial_Carcinoma	4	43	8.51064	46	3935	7.35515	0.00253067	1
ARID1A	Sarcoma	21	291	6.73077	455	3261	-5.51358	0.00253343	1
NAT2	Breast_Adenocarcinoma	6	596	0.996678	5	3421	0.850735	0.00256633	1
RNF43	Breast_Adenocarcinoma	8	594	1.3289	124	3302	-2.29048	0.0025938	1
FGF1	Endometrial_Carcinoma	2	45	4.25532	5	3976	4.12972	0.00269642	1
ABCC1	Colorectal_Adenocarcinoma	9	972	0.917431	74	2973	-1.51119	0.00271587	1
APCDD1	Endometrial_Carcinoma	4	43	8.51064	47	3934	7.33003	0.00272276	1
FGF7	Colorectal_Adenocarcinoma	3	978	0.30581	43	3004	-1.10541	0.00282603	1
IRS2	Gastric_Adenocarcinoma	21	409	4.88372	81	3517	2.63247	0.00285623	1
BAX	Endometrial_Carcinoma	3	44	6.38298	22	3959	5.83035	0.00286084	1
DOT1L	Endometrial_Carcinoma	6	41	12.766	118	3863	9.80188	0.00287753	1
EML4	Colorectal_Adenocarcinoma	8	973	0.815494	69	2978	-1.44903	0.00289356	1
ABCB1	Colorectal_Adenocarcinoma	12	969	1.22324	88	2959	-1.66485	0.0029312	1
MNS1	Colorectal_Adenocarcinoma	7	974	0.713558	3	3044	0.6151	0.00294639	1
NDUFC2	Ampullary_Carcinoma	1	11	8.33333	0	4016	8.33333	0.00297915	1
SERPINA5	Ampullary_Carcinoma	1	11	8.33333	0	4016	8.33333	0.00297915	1
MAP2K4	Sarcoma	1	311	0.320513	109	3607	-2.61275	0.00300324	1
BRCA2	Ovarian_Carcinoma	37	204	15.3527	347	3440	6.18977	0.00301648	1
CDKN2A	Lung_Adenocarcinoma	16	194	7.61905	126	3692	4.31889	0.00303435	1
CIC	Endometrial_Carcinoma	8	39	17.0213	208	3773	11.7965	0.00307644	1
KRAS	Gallbladder_Cancer	4	70	5.40541	707	3247	-12.4752	0.00308033	1
NOTCH1	Lung_Adenocarcinoma	21	189	10	185	3633	5.15453	0.0030969	1
PIK3R2	Endometrial_Carcinoma	4	43	8.51064	49	3932	7.27979	0.00313658	1
PIK3R2	Colorectal_Adenocarcinoma	4	977	0.407747	49	2998	-1.20039	0.00316252	1
NF1	Cholangiocarcinoma	6	149	3.87097	425	3448	-7.10244	0.00319417	1
ARID1A	Breast_Adenocarcinoma	50	552	8.30565	426	3000	-4.12868	0.00319664	1
CBLB	Head_Neck_Carcinoma	13	213	5.75221	86	3716	3.49025	0.00320287	1
JPH4	Endometrial_Carcinoma	3	44	6.38298	23	3958	5.80523	0.0032077	1
H19	Thyroid_Carcinoma	1	12	7.69231	0	4015	7.69231	0.00322741	1
CTCF	Thymic_Carcinoma	3	17	15	59	3949	13.5279	0.00328534	1
FGF2	Gastric_Adenocarcinoma	8	422	1.86047	17	3581	1.38798	0.00330863	1
CBL	Breast_Adenocarcinoma	31	571	5.1495	95	3331	2.37659	0.00336243	1
VCP	Colorectal_Adenocarcinoma	9	972	0.917431	6	3041	0.720516	0.00340291	1
RAD51C	Breast_Adenocarcinoma	22	580	3.65449	57	3369	1.99074	0.00346697	1
KDM5C	Colorectal_Adenocarcinoma	23	958	2.34455	31	3016	1.32715	0.00348065	1
GLI2	Thyroid_Carcinoma	3	10	23.0769	97	3918	20.661	0.00354359	1
TEAD2	Endometrial_Carcinoma	3	44	6.38298	24	3957	5.78012	0.00357933	1
TBX3	Breast_Adenocarcinoma	25	577	4.15282	71	3355	2.08044	0.0035868	1
TP53	Thyroid_Carcinoma	1	12	7.69231	1936	2079	-40.5269	0.00364925	1
PTEN	Colorectal_Adenocarcinoma	39	942	3.97554	196	2851	-2.45702	0.0036917	1
FOXA1	Sarcoma	0	312	0	74	3642	-1.99139	0.003758	1
PPP2R2A	Sarcoma	0	312	0	76	3640	-2.04521	0.00380224	1
KMT2D	Endometrial_Carcinoma	12	35	25.5319	431	3550	14.7055	0.00385033	1
PARP4	Colorectal_Adenocarcinoma	15	966	1.52905	100	2947	-1.75286	0.00388407	1
PIK3CB	Colorectal_Adenocarcinoma	15	966	1.52905	100	2947	-1.75286	0.00388407	1
PIK3C3	Thymic_Carcinoma	3	17	15	63	3945	13.4281	0.00392501	1
MAP2K4	Breast_Adenocarcinoma	28	574	4.65116	82	3344	2.2577	0.00392544	1
MPL	Ovarian_Carcinoma	8	233	3.3195	36	3751	2.36888	0.00395366	1
DOT1L	Colorectal_Adenocarcinoma	17	964	1.73293	107	2940	-1.77873	0.00397398	1
DDX27	Endometrial_Carcinoma	3	44	6.38298	25	3956	5.755	0.00397627	1
UGT1A3	Endometrial_Carcinoma	3	44	6.38298	25	3956	5.755	0.00397627	1
MSH6	Head_Neck_Carcinoma	18	208	7.9646	141	3661	4.25603	0.00398629	1
TOP1	Endometrial_Carcinoma	5	42	10.6383	87	3894	8.45292	0.00400904	1
KDR	Ovarian_Carcinoma	23	218	9.54357	187	3600	4.60562	0.00401227	1
JAK2	Renal_Cell_Carcinoma	7	44	13.7255	156	3821	9.80294	0.00402377	1
KRAS	Esophageal_Carcinoma	1	42	2.32558	710	3275	-15.4912	0.0040685	1
FAT3	Sarcoma	21	291	6.73077	444	3272	-5.21756	0.00415343	1
PTCH2	Urothelial_Carcinoma	9	146	5.80645	74	3799	3.89579	0.00420331	1
LATS1	Sarcoma	1	311	0.320513	101	3615	-2.39746	0.00420912	1
PTPN11	Ovarian_Carcinoma	12	229	4.97925	73	3714	3.05161	0.00421942	1
MAP3K1	Endometrial_Carcinoma	7	40	14.8936	172	3809	10.5731	0.0042367	1
CYP2C19	Thyroid_Carcinoma	2	11	15.3846	29	3986	14.6623	0.00424188	1
FBXW7	Pancreatic_Adenocarcinoma	1	116	0.854701	270	3641	-6.0489	0.00433203	1
IDH2	Urothelial_Carcinoma	6	149	3.87097	35	3838	2.96728	0.00433843	1
TSC1	Cholangiocarcinoma	0	155	0	156	3717	-4.02789	0.00434354	1
FRS2	Colorectal_Adenocarcinoma	3	978	0.30581	42	3005	-1.07259	0.00437113	1
KDM6A	Gastric_Adenocarcinoma	6	424	1.39535	145	3453	-2.63467	0.00437175	1
ERBB2	Breast_Adenocarcinoma	40	562	6.64452	134	3292	2.73325	0.00440463	1
VHL	Colorectal_Adenocarcinoma	4	977	0.407747	46	3001	-1.10193	0.00443747	1
WT1	Colorectal_Adenocarcinoma	4	977	0.407747	46	3001	-1.10193	0.00443747	1
IRS2	Breast_Adenocarcinoma	26	576	4.31894	76	3350	2.10061	0.00451683	1
TOP1	Breast_Adenocarcinoma	24	578	3.98671	68	3358	2.00189	0.00452211	1
SERPINB3	Prostate_Adenocarcinoma	4	55	6.77966	43	3926	5.69626	0.00463248	1
FLT3	Colorectal_Adenocarcinoma	18	963	1.83486	111	2936	-1.80807	0.004638	1
NUP93	Head_Neck_Carcinoma	6	220	2.65487	23	3779	2.04992	0.00466129	1
PAK1	Lung_Adenocarcinoma	7	203	3.33333	34	3784	2.44281	0.00467338	1
PTPN11	Colorectal_Adenocarcinoma	10	971	1.01937	75	2972	-1.44207	0.00474049	1
NFKBIA	Endometrial_Carcinoma	3	44	6.38298	27	3954	5.70476	0.00484814	1
GATA3	Gastric_Adenocarcinoma	2	428	0.465116	87	3511	-1.95289	0.00487408	1
EPHB4	Urothelial_Carcinoma	9	146	5.80645	76	3797	3.84415	0.00493163	1
NF2	Renal_Cell_Carcinoma	5	46	9.80392	84	3893	7.69178	0.0049634	1
IL6ST	Thymic_Carcinoma	1	19	5	0	4008	5	0.00496524	1
KDM5A	Colorectal_Adenocarcinoma	27	954	2.75229	147	2900	-2.07212	0.00496589	1
ATRX	Prostate_Adenocarcinoma	14	45	23.7288	431	3538	12.8697	0.00496707	1
CSF1R	Prostate_Adenocarcinoma	5	54	8.47458	72	3897	6.66052	0.00501228	1
BRCA1	Sarcoma	10	302	3.20513	267	3449	-3.98002	0.005029	1
KRAS	Renal_Cell_Carcinoma	2	49	3.92157	709	3268	-13.9059	0.0052254	1
NTRK1	Gastric_Adenocarcinoma	19	411	4.4186	73	3525	2.3897	0.00526184	1
PIK3R2	Breast_Adenocarcinoma	16	586	2.65781	37	3389	1.57783	0.00526739	1
FGF14	Prostate_Adenocarcinoma	5	54	8.47458	73	3896	6.63532	0.00529632	1
TRRAP	Colorectal_Adenocarcinoma	12	969	1.22324	83	2964	-1.50075	0.00530014	1
SETD2	Gastric_Adenocarcinoma	21	409	4.88372	312	3286	-3.78776	0.00535048	1
PARP3	Thyroid_Carcinoma	2	11	15.3846	33	3982	14.5627	0.0053884	1
SUZ12	Urothelial_Carcinoma	8	147	5.16129	63	3810	3.53464	0.00543668	1
TERT	Endometrial_Carcinoma	4	43	8.51064	58	3923	7.05372	0.00553506	1
RPA1	Thymic_Carcinoma	2	18	10	21	3987	9.47605	0.0055675	1
TNFRSF14	Thymic_Carcinoma	2	18	10	21	3987	9.47605	0.0055675	1
ARID2	Renal_Cell_Carcinoma	9	42	17.6471	258	3719	11.1598	0.00557666	1
CYP2A13	Prostate_Adenocarcinoma	2	57	3.38983	6	3963	3.23866	0.00558108	1
HSPH1	Ovarian_Carcinoma	12	229	4.97925	76	3711	2.97239	0.00561536	1
ASH1L	Gastric_Adenocarcinoma	5	425	1.16279	7	3591	0.968238	0.00567197	1
TTC3	Gastric_Adenocarcinoma	5	425	1.16279	7	3591	0.968238	0.00567197	1
MAP2K7	Lung_Adenocarcinoma	20	190	9.52381	186	3632	4.65215	0.00570255	1
ARID2	Breast_Adenocarcinoma	56	546	9.30233	211	3215	3.14354	0.00578234	1
IDO1	Endometrial_Carcinoma	3	44	6.38298	29	3952	5.65452	0.00582712	1
NOTCH3	Others	10	68	12.8205	196	3754	7.85849	0.0058505	1
REL	Thymic_Carcinoma	2	18	10	22	3986	9.4511	0.00605561	1
FANCI	Thymic_Carcinoma	4	16	20	150	3858	16.2575	0.00616652	1
NKX2-1	Colorectal_Adenocarcinoma	3	978	0.30581	39	3008	-0.974137	0.00618003	1
SLX4	Gastric_Adenocarcinoma	19	411	4.4186	76	3522	2.30632	0.00621552	1
FLT4	Endometrial_Carcinoma	5	42	10.6383	97	3884	8.20172	0.00622544	1
WEE1	Colorectal_Adenocarcinoma	3	978	0.30581	40	3007	-1.00696	0.0063683	1
MSH3	Gastric_Adenocarcinoma	27	403	6.27907	123	3475	2.8605	0.00639226	1
ADRB2	Thyroid_Carcinoma	1	12	7.69231	1	4014	7.6674	0.0064452	1
ERBB3	Sarcoma	5	307	1.60256	175	3541	-3.1068	0.00650621	1
TNKS	Colorectal_Adenocarcinoma	25	956	2.54842	136	2911	-1.91499	0.00650995	1
NBN	Others	5	73	6.41026	57	3893	4.96722	0.00654446	1
TRRAP	Renal_Cell_Carcinoma	5	46	9.80392	90	3887	7.54091	0.00654478	1
HDAC2	Colorectal_Adenocarcinoma	4	977	0.407747	45	3002	-1.06912	0.00655271	1
STK11	Lung_Adenocarcinoma	9	201	4.28571	57	3761	2.79279	0.00663183	1
DOT1L	Breast_Adenocarcinoma	30	572	4.98339	94	3332	2.23966	0.00664833	1
BCORL1	Colorectal_Adenocarcinoma	23	958	2.34455	129	2918	-1.88913	0.00673509	1
ERCC2	Endometrial_Carcinoma	5	42	10.6383	99	3882	8.15149	0.00675527	1
STAT3	Breast_Adenocarcinoma	21	581	3.48837	59	3367	1.76625	0.00680374	1
LMAN1	Colorectal_Adenocarcinoma	12	969	1.22324	12	3035	0.829412	0.00682408	1
PTCH2	Prostate_Adenocarcinoma	5	54	8.47458	78	3891	6.50935	0.00689013	1
TMPRSS2	Others	4	74	5.12821	36	3914	4.21681	0.00701047	1
RNF43	Colorectal_Adenocarcinoma	46	935	4.68909	86	2961	1.86664	0.00701627	1
TET2	Others	10	68	12.8205	202	3748	7.70659	0.00714214	1
MLH1	Head_Neck_Carcinoma	16	210	7.07965	124	3678	3.8182	0.00726005	1
ERCC6-PGBD3	Thyroid_Carcinoma	2	11	15.3846	39	3976	14.4133	0.00734537	1
HRAS	Thyroid_Carcinoma	2	11	15.3846	39	3976	14.4133	0.00734537	1
TP53	Neuroendocrine_Carcinoma	5	19	20.8333	1932	2072	-27.4184	0.00737104	1
RAD50	Thymic_Carcinoma	4	16	20	158	3850	16.0579	0.0073738	1
PARP1	Breast_Adenocarcinoma	20	582	3.32226	54	3372	1.74608	0.00738463	1
ETV4	Ovarian_Carcinoma	7	234	2.90456	32	3755	2.05957	0.00744098	1
ADA	Adrenal_Carcinoma	1	29	3.33333	0	3998	3.33333	0.00744786	1
BRCA2	Urothelial_Carcinoma	25	130	16.129	359	3514	6.85973	0.00750712	1
DICER1	Prostate_Adenocarcinoma	7	52	11.8644	151	3818	8.05992	0.00766802	1
GEN1	Esophageal_Carcinoma	4	39	9.30233	71	3914	7.52064	0.0079021	1
BRIP1	Breast_Adenocarcinoma	41	561	6.81063	144	3282	2.60748	0.0079184	1
PTPN11	Thymic_Carcinoma	3	17	15	82	3926	12.9541	0.00797709	1
KDM6A	Ovarian_Carcinoma	2	239	0.829876	149	3638	-3.10464	0.0080233	1
INSR	Urothelial_Carcinoma	10	145	6.45161	98	3775	3.92127	0.00803279	1
FAT3	Pancreatic_Adenocarcinoma	5	112	4.2735	460	3451	-7.48819	0.00805895	1
POLE	Head_Neck_Carcinoma	2	224	0.884956	159	3643	-3.29705	0.00806518	1
CHEK2	Esophageal_Carcinoma	5	38	11.6279	114	3871	8.76718	0.0081165	1
ASH1L	Endometrial_Carcinoma	2	45	4.25532	10	3971	4.00413	0.00816501	1
RBBP8	Endometrial_Carcinoma	2	45	4.25532	10	3971	4.00413	0.00816501	1
TTC3	Endometrial_Carcinoma	2	45	4.25532	10	3971	4.00413	0.00816501	1
MYD88	Others	3	75	3.84615	19	3931	3.36514	0.00825379	1
EIF1AX	Lung_Adenocarcinoma	5	205	2.38095	20	3798	1.85712	0.00828865	1
ARAF	Adrenal_Carcinoma	3	27	10	54	3944	8.64932	0.00832131	1
HNF1A	Colorectal_Adenocarcinoma	2	979	0.203874	32	3015	-0.84634	0.00832713	1
TSC1	Urothelial_Carcinoma	13	142	8.3871	143	3730	4.69487	0.00839433	1
AKAP7	Gastric_Adenocarcinoma	5	425	1.16279	8	3590	0.940445	0.00842097	1
FANCE	Thyroid_Carcinoma	2	11	15.3846	42	3973	14.3385	0.00842792	1
MAML1	Adrenal_Carcinoma	2	28	6.66667	17	3981	6.24145	0.00847703	1
RAD54L	Breast_Adenocarcinoma	22	580	3.65449	64	3362	1.78642	0.00867361	1
HSP90AA1	Breast_Adenocarcinoma	26	576	4.31894	81	3345	1.95466	0.00875909	1
SPEN	Head_Neck_Carcinoma	25	201	11.0619	242	3560	4.69688	0.00876409	1
NUP93	Thymic_Carcinoma	2	18	10	27	3981	9.32635	0.00877653	1
SULT1E1	Prostate_Adenocarcinoma	2	57	3.38983	8	3961	3.18827	0.00880217	1
FRS2	Thyroid_Carcinoma	2	11	15.3846	43	3972	14.3136	0.00880388	1
EPHB1	Endometrial_Carcinoma	5	42	10.6383	106	3875	7.97565	0.00886001	1
TCERG1	Ampullary_Carcinoma	1	11	8.33333	2	4014	8.28353	0.00891304	1
PLCG1	Thyroid_Carcinoma	3	10	23.0769	136	3879	19.6896	0.00891982	1
ERBB4	Gallbladder_Cancer	0	74	0	272	3682	-6.87911	0.00892263	1
FANCA	Colorectal_Adenocarcinoma	17	964	1.73293	102	2945	-1.61463	0.00892774	1
PIK3CA	Ovarian_Carcinoma	25	216	10.3734	633	3154	-6.34163	0.00894499	1
CHD4	Colorectal_Adenocarcinoma	31	950	3.16004	158	2889	-2.02539	0.00899242	1
EP300	Thymic_Carcinoma	5	15	25	267	3741	18.3383	0.00904436	1
ATR	Cholangiocarcinoma	4	151	2.58065	316	3557	-5.5784	0.00908927	1
FGF10	Colorectal_Adenocarcinoma	3	978	0.30581	37	3010	-0.908499	0.00912323	1
BCR	Melanoma	3	56	5.08475	27	3942	4.40447	0.00915329	1
CDX2	Cervical_Carcinoma	2	48	4	10	3968	3.74862	0.00920684	1
CDC73	Thymic_Carcinoma	3	17	15	87	3921	12.8293	0.00933917	1
NFKBIA	Thymic_Carcinoma	2	18	10	28	3980	9.3014	0.00937555	1
GNAS	Breast_Adenocarcinoma	13	589	2.15947	149	3277	-2.18963	0.0094508	1
ERBB2	Pancreatic_Adenocarcinoma	0	117	0	174	3737	-4.44899	0.009477	1
BACH1	Colorectal_Adenocarcinoma	12	969	1.22324	80	2967	-1.40229	0.00948943	1
AKAP7	Endometrial_Carcinoma	2	45	4.25532	11	3970	3.97901	0.00957821	1
GNA11	Endometrial_Carcinoma	2	45	4.25532	11	3970	3.97901	0.00957821	1
NAT1	Endometrial_Carcinoma	2	45	4.25532	11	3970	3.97901	0.00957821	1
INHBA	Others	2	76	2.5641	6	3944	2.4122	0.00961144	1
AHR	Hepatocellular_Carcinoma	1	38	2.5641	0	3989	2.5641	0.00968222	1
CDH5	Colorectal_Adenocarcinoma	9	972	0.917431	67	2980	-1.28145	0.00975146	1
ASNS	Lung_Adenocarcinoma	6	204	2.85714	30	3788	2.07139	0.00978508	1
PRKCB	Endometrial_Carcinoma	4	43	8.51064	69	3912	6.77741	0.00983721	1
MAD1L1	Gastric_Adenocarcinoma	12	418	2.7907	40	3558	1.67897	0.00995004	1
ACVR2A	Colorectal_Adenocarcinoma	18	963	1.83486	24	3023	1.0472	0.010012	1
FCGR2B	Ovarian_Carcinoma	4	237	1.65975	11	3776	1.36928	0.0101003	1
CDH20	Breast_Adenocarcinoma	9	593	1.49502	17	3409	0.998811	0.0101153	1
STAT4	Head_Neck_Carcinoma	12	214	5.30973	83	3719	3.12667	0.0101492	1
CREBBP	Head_Neck_Carcinoma	26	200	11.5044	256	3546	4.77113	0.0101878	1
POLE	Endometrial_Carcinoma	6	41	12.766	155	3826	8.87246	0.0102519	1
TNKS	Endometrial_Carcinoma	6	41	12.766	155	3826	8.87246	0.0102519	1
APOH	Ovarian_Carcinoma	2	239	0.829876	1	3786	0.803469	0.010274	1
EWSR1	Endometrial_Carcinoma	4	43	8.51064	70	3911	6.75229	0.0103116	1
GPR124	Gastric_Adenocarcinoma	7	423	1.62791	17	3581	1.15542	0.0103547	1
LMAN1	Gastric_Adenocarcinoma	7	423	1.62791	17	3581	1.15542	0.0103547	1
HDAC2	Thyroid_Carcinoma	2	11	15.3846	47	3968	14.214	0.0103821	1
RAD51B	Breast_Adenocarcinoma	19	583	3.15615	52	3374	1.63834	0.0104141	1
SUZ12	Breast_Adenocarcinoma	19	583	3.15615	52	3374	1.63834	0.0104141	1
RAF1	Thymic_Carcinoma	3	17	15	91	3917	12.7295	0.0105219	1
APOBEC3A	Others	3	75	3.84615	21	3929	3.31451	0.0105513	1
PIK3C3	Head_Neck_Carcinoma	9	217	3.9823	57	3745	2.48309	0.0105634	1
CDC42	Cervical_Carcinoma	2	48	4	11	3967	3.72348	0.010795	1
GEN1	Endometrial_Carcinoma	4	43	8.51064	71	3910	6.72717	0.0108006	1
EPHA3	Urothelial_Carcinoma	15	140	9.67742	180	3693	5.02986	0.0109678	1
NKX2-1	Gastric_Adenocarcinoma	10	420	2.32558	32	3566	1.4362	0.0109935	1
SRPR	Breast_Adenocarcinoma	0	602	0	33	3393	-0.963222	0.0110512	1
XRCC1	Colorectal_Adenocarcinoma	1	980	0.101937	26	3021	-0.751362	0.011056	1
AR	Colorectal_Adenocarcinoma	75	906	7.64526	318	2729	-2.79123	0.0110841	1
NCOR1	Head_Neck_Carcinoma	24	202	10.6195	233	3569	4.49112	0.0111764	1
TBX3	Colorectal_Adenocarcinoma	13	968	1.32518	83	2964	-1.39881	0.0111873	1
TOP1	Ovarian_Carcinoma	12	229	4.97925	80	3707	2.86676	0.011227	1
C3	Gastric_Adenocarcinoma	2	428	0.465116	0	3598	0.465116	0.0113725	1
ABL2	Breast_Adenocarcinoma	30	572	4.98339	99	3327	2.09372	0.011409	1
RB1	Pancreatic_Adenocarcinoma	2	115	1.7094	303	3608	-6.03798	0.0114758	1
CDH2	Colorectal_Adenocarcinoma	15	966	1.52905	91	2956	-1.45749	0.0114797	1
PKHD1	Lung_Adenocarcinoma	29	181	13.8095	323	3495	5.3496	0.0115124	1
CDKN2A	Breast_Adenocarcinoma	11	591	1.82724	131	3295	-1.99646	0.0116195	1
NPM1	Head_Neck_Carcinoma	7	219	3.09735	38	3764	2.09787	0.0116407	1
ABCC5	Endometrial_Carcinoma	1	46	2.12766	0	3981	2.12766	0.0116683	1
AIM2	Endometrial_Carcinoma	1	46	2.12766	0	3981	2.12766	0.0116683	1
COL18A1	Endometrial_Carcinoma	1	46	2.12766	0	3981	2.12766	0.0116683	1
OR6C75	Endometrial_Carcinoma	1	46	2.12766	0	3981	2.12766	0.0116683	1
POLG	Endometrial_Carcinoma	1	46	2.12766	0	3981	2.12766	0.0116683	1
SLC28A1	Endometrial_Carcinoma	1	46	2.12766	0	3981	2.12766	0.0116683	1
ETV1	Neuroendocrine_Carcinoma	3	21	12.5	78	3926	10.5519	0.0116959	1
KMT2A	Ovarian_Carcinoma	32	209	13.278	311	3476	5.0657	0.0117639	1
WWP1	Renal_Cell_Carcinoma	3	48	5.88235	35	3942	5.00229	0.0118127	1
EGF	Endometrial_Carcinoma	4	43	8.51064	73	3908	6.67693	0.0118234	1
EPHA2	Endometrial_Carcinoma	4	43	8.51064	73	3908	6.67693	0.0118234	1
RUNX1T1	Others	3	75	3.84615	22	3928	3.28919	0.0118253	1
LTK	Colorectal_Adenocarcinoma	10	971	1.01937	69	2978	-1.24515	0.0118645	1
SLC22A2	Neuroendocrine_Carcinoma	1	23	4.16667	1	4003	4.14169	0.0118826	1
ESRP1	Gastric_Adenocarcinoma	5	425	1.16279	9	3589	0.912652	0.0119714	1
CYLD	Head_Neck_Carcinoma	6	220	2.65487	29	3773	1.89211	0.0120259	1
MPL	Gastric_Adenocarcinoma	0	430	0	44	3554	-1.2229	0.0120411	1
RNF43	Sarcoma	3	309	0.961538	129	3587	-2.50994	0.0120895	1
SLAMF1	Colorectal_Adenocarcinoma	10	971	1.01937	9	3038	0.723995	0.012102	1
MAP2K7	Colorectal_Adenocarcinoma	35	946	3.56779	171	2876	-2.04429	0.0121679	1
RBBP8	Colorectal_Adenocarcinoma	7	974	0.713558	5	3042	0.549462	0.0121747	1
GPR124	Cholangiocarcinoma	4	151	2.58065	20	3853	2.06425	0.0122807	1
CD79A	Adrenal_Carcinoma	2	28	6.66667	21	3977	6.1414	0.0123128	1
GNAQ	Gastric_Adenocarcinoma	0	430	0	45	3553	-1.25069	0.0123652	1
RAF1	Breast_Adenocarcinoma	23	579	3.8206	71	3355	1.74821	0.0124743	1
CYLD	Thymic_Carcinoma	2	18	10	33	3975	9.17665	0.0126351	1
CHRNA5	Renal_Cell_Carcinoma	1	50	1.96078	0	3977	1.96078	0.0126614	1
T	Renal_Cell_Carcinoma	1	50	1.96078	0	3977	1.96078	0.0126614	1
SMAD4	Ovarian_Carcinoma	9	232	3.73444	302	3485	-4.24021	0.0127016	1
SMARCA1	Breast_Adenocarcinoma	36	566	5.98007	126	3300	2.30231	0.0127557	1
TP53	Thymic_Carcinoma	4	16	20	1933	2075	-28.2285	0.0128056	1
UGT1A7	Thyroid_Carcinoma	1	12	7.69231	3	4012	7.61759	0.012852	1
APOBEC3B	Head_Neck_Carcinoma	4	222	1.76991	13	3789	1.42799	0.0128728	1
NF1	Ovarian_Carcinoma	38	203	15.7676	393	3394	5.39003	0.0129392	1
JAK2	Breast_Adenocarcinoma	36	566	5.98007	127	3299	2.27312	0.0131175	1
STAG2	Head_Neck_Carcinoma	19	207	8.40708	168	3634	3.98835	0.0131316	1
SMAD4	Melanoma	0	59	0	311	3658	-7.83573	0.0131555	1
CYP17A1	Endometrial_Carcinoma	3	44	6.38298	40	3941	5.37821	0.0132587	1
BRD4	Head_Neck_Carcinoma	5	221	2.21239	21	3781	1.66005	0.0132753	1
BCOR	Thymic_Carcinoma	4	16	20	188	3820	15.3094	0.0132875	1
POLD1	Colorectal_Adenocarcinoma	33	948	3.36391	59	2988	1.42758	0.0134009	1
FLT4	Others	6	72	7.69231	96	3854	5.26193	0.0134042	1
ABCG2	Thyroid_Carcinoma	2	11	15.3846	54	3961	14.0397	0.0134236	1
MEN1	Colorectal_Adenocarcinoma	4	977	0.407747	41	3006	-0.937839	0.0134971	1
ETV4	Colorectal_Adenocarcinoma	3	978	0.30581	36	3011	-0.87568	0.0135027	1
HDAC2	Breast_Adenocarcinoma	14	588	2.32558	35	3391	1.30398	0.0135058	1
ABCC1	Urothelial_Carcinoma	8	147	5.16129	75	3798	3.22481	0.0136715	1
PARP3	Breast_Adenocarcinoma	11	591	1.82724	24	3402	1.12672	0.0137423	1
ASNS	Head_Neck_Carcinoma	6	220	2.65487	30	3772	1.86581	0.0137735	1
IKBKE	Endometrial_Carcinoma	3	44	6.38298	41	3940	5.35309	0.014114	1
KIF5B	Colorectal_Adenocarcinoma	11	970	1.1213	73	2974	-1.27449	0.0141893	1
TOP2A	Pancreatic_Adenocarcinoma	0	117	0	158	3753	-4.03989	0.0143079	1
ZNF217	Breast_Adenocarcinoma	22	580	3.65449	66	3360	1.72804	0.0143385	1
ADAMTS18	Colorectal_Adenocarcinoma	3	978	0.30581	0	3047	0.30581	0.0144123	1
PDGFB	Colorectal_Adenocarcinoma	3	978	0.30581	0	3047	0.30581	0.0144123	1
SUMO1	Colorectal_Adenocarcinoma	3	978	0.30581	0	3047	0.30581	0.0144123	1
TFE3	Colorectal_Adenocarcinoma	3	978	0.30581	0	3047	0.30581	0.0144123	1
CASP8	Colorectal_Adenocarcinoma	11	970	1.1213	74	2973	-1.30731	0.0144934	1
EPHB4	Colorectal_Adenocarcinoma	11	970	1.1213	74	2973	-1.30731	0.0144934	1
JAK2	Cervical_Carcinoma	6	44	12	157	3821	8.05329	0.0145527	1
SETBP1	Breast_Adenocarcinoma	34	568	5.64784	119	3307	2.1744	0.0146191	1
HGF	Colorectal_Adenocarcinoma	19	962	1.9368	106	2941	-1.54203	0.0146379	1
DKK1	Prostate_Adenocarcinoma	1	58	1.69492	0	3969	1.69492	0.0146475	1
TTK	Prostate_Adenocarcinoma	1	58	1.69492	0	3969	1.69492	0.0146475	1
AMER1	Cervical_Carcinoma	3	47	6	39	3939	5.01961	0.0147091	1
ELMO1	Thymic_Carcinoma	2	18	10	36	3972	9.1018	0.0147964	1
CBL	Colorectal_Adenocarcinoma	19	962	1.9368	107	2940	-1.57485	0.0148115	1
CBL	Endometrial_Carcinoma	5	42	10.6383	121	3860	7.59886	0.0148261	1
APC	Esophageal_Carcinoma	3	40	6.97674	875	3110	-14.9806	0.0149141	1
APLNR	Lung_Adenocarcinoma	4	206	1.90476	15	3803	1.51189	0.0149927	1
BCL2L11	Lung_Adenocarcinoma	4	206	1.90476	15	3803	1.51189	0.0149927	1
APC	Cervical_Carcinoma	4	46	8	874	3104	-13.9708	0.0149954	1
EIF2B3	Gastric_Adenocarcinoma	6	424	1.39535	14	3584	1.00624	0.0150371	1
TBC1D23	Gastric_Adenocarcinoma	6	424	1.39535	14	3584	1.00624	0.0150371	1
FANCD2	Others	11	67	14.1026	244	3706	7.92535	0.0150425	1
TGFBR1	Gastric_Adenocarcinoma	14	416	3.25581	54	3544	1.75498	0.0150914	1
NOTCH3	Sarcoma	7	305	2.24359	199	3517	-3.11163	0.0151107	1
ERCC3	Urothelial_Carcinoma	6	149	3.87097	47	3826	2.65744	0.0151767	1
PIK3C3	Melanoma	4	55	6.77966	62	3907	5.21755	0.0152385	1
PTCH2	Endometrial_Carcinoma	4	43	8.51064	79	3902	6.52621	0.0152603	1
BAP1	Others	6	72	7.69231	99	3851	5.18598	0.015306	1
RB1	Gastric_Adenocarcinoma	20	410	4.65116	285	3313	-3.2699	0.0154612	1
ABCC4	Breast_Adenocarcinoma	5	597	0.830565	6	3420	0.655433	0.0155132	1
NFE2L2	Thymic_Carcinoma	2	18	10	37	3971	9.07685	0.01555	1
SRSF1	Head_Neck_Carcinoma	3	223	1.32743	7	3795	1.14332	0.0155897	1
SOCS1	Breast_Adenocarcinoma	7	595	1.16279	12	3414	0.812528	0.0157891	1
H3F3A	Sarcoma	5	307	1.60256	15	3701	1.1989	0.01587	1
DDX27	Breast_Adenocarcinoma	0	602	0	28	3398	-0.81728	0.015871	1
FGF7	Endometrial_Carcinoma	3	44	6.38298	43	3938	5.30285	0.0159171	1
PML	Endometrial_Carcinoma	3	44	6.38298	43	3938	5.30285	0.0159171	1
ERCC6	Prostate_Adenocarcinoma	5	54	8.47458	97	3872	6.03064	0.0160095	1
TBX3	Lung_Adenocarcinoma	11	199	5.2381	85	3733	3.0118	0.0160169	1
ROBO2	Head_Neck_Carcinoma	8	218	3.53982	51	3751	2.19842	0.0161009	1
UGT1A3	Others	3	75	3.84615	25	3925	3.21324	0.0161595	1
KRAS	Others	6	72	7.69231	705	3245	-10.1558	0.0161626	1
ABL2	Endometrial_Carcinoma	5	42	10.6383	124	3857	7.5235	0.0162806	1
FLT3	Endometrial_Carcinoma	5	42	10.6383	124	3857	7.5235	0.0162806	1
ZNRF3	Others	4	74	5.12821	47	3903	3.93833	0.0163374	1
TYMS	Gastric_Adenocarcinoma	5	425	1.16279	10	3588	0.884859	0.0164158	1
CHEK2	Renal_Cell_Carcinoma	5	46	9.80392	114	3863	6.93744	0.0164347	1
AR	Pancreatic_Adenocarcinoma	4	113	3.4188	389	3522	-6.5275	0.0164752	1
HLA-DRB1	Pancreatic_Adenocarcinoma	5	112	4.2735	47	3864	3.07177	0.0166153	1
NRG1	Colorectal_Adenocarcinoma	47	934	4.79103	95	2952	1.67321	0.016646	1
WHSC1L1	Cervical_Carcinoma	3	47	6	41	3937	4.96933	0.0166783	1
HSPH1	Colorectal_Adenocarcinoma	12	969	1.22324	76	2971	-1.27102	0.0166911	1
LAMP1	Colorectal_Adenocarcinoma	1	980	0.101937	24	3023	-0.685723	0.0167462	1
KCNMA1	Colorectal_Adenocarcinoma	18	963	1.83486	101	2946	-1.47987	0.0167582	1
SDHB	Adrenal_Carcinoma	2	28	6.66667	25	3973	6.04135	0.0167704	1
STAG2	Urothelial_Carcinoma	14	141	9.03226	173	3700	4.56544	0.0167842	1
SDHAF2	Renal_Cell_Carcinoma	2	49	3.92157	14	3963	3.56954	0.0168418	1
FBXW7	Breast_Adenocarcinoma	27	575	4.48505	244	3182	-2.63696	0.0169315	1
B2M	Neuroendocrine_Carcinoma	2	22	8.33333	32	3972	7.53413	0.0169953	1
PDGFRA	Urothelial_Carcinoma	11	144	7.09677	121	3752	3.97258	0.017089	1
HRAS	Thymic_Carcinoma	2	18	10	39	3969	9.02695	0.0171062	1
PHLPP2	Thymic_Carcinoma	2	18	10	39	3969	9.02695	0.0171062	1
CUL4B	Breast_Adenocarcinoma	14	588	2.32558	37	3389	1.2456	0.0171395	1
NT5C2	Breast_Adenocarcinoma	14	588	2.32558	37	3389	1.2456	0.0171395	1
TCEB3	Colorectal_Adenocarcinoma	6	975	0.611621	4	3043	0.480344	0.0172082	1
AR	Breast_Adenocarcinoma	75	527	12.4585	318	3108	3.17651	0.0172096	1
MET	Breast_Adenocarcinoma	38	564	6.31229	139	3287	2.25508	0.0172299	1
EPHB6	Thymic_Carcinoma	3	17	15	110	3898	12.2555	0.0173064	1
FGFR4	Thyroid_Carcinoma	2	11	15.3846	62	3953	13.8404	0.017319	1
DICER1	Gastric_Adenocarcinoma	8	422	1.86047	150	3448	-2.30852	0.0173568	1
KMT2D	Cholangiocarcinoma	8	147	5.16129	435	3438	-6.07031	0.017495	1
TNKS2	Renal_Cell_Carcinoma	3	48	5.88235	41	3936	4.85143	0.0175875	1
CYP2A6	Ampullary_Carcinoma	1	11	8.33333	5	4011	8.20883	0.0177532	1
RNF43	Endometrial_Carcinoma	5	42	10.6383	127	3854	7.44814	0.0178282	1
RIT1	Lung_Adenocarcinoma	4	206	1.90476	16	3802	1.48569	0.017993	1
FGF4	Endometrial_Carcinoma	2	45	4.25532	16	3965	3.85341	0.0181051	1
FUBP1	Breast_Adenocarcinoma	10	592	1.66113	21	3405	1.04817	0.018247	1
BLM	Renal_Cell_Carcinoma	6	45	11.7647	162	3815	7.69128	0.0182838	1
DNMT1	Endometrial_Carcinoma	5	42	10.6383	128	3853	7.42303	0.0183651	1
TGFB1	Gallbladder_Cancer	1	73	1.35135	0	3954	1.35135	0.0183714	1
KMT2D	Sarcoma	22	290	7.05128	421	3295	-4.2781	0.0183784	1
CYP17A1	Thymic_Carcinoma	2	18	10	41	3967	8.97705	0.0187264	1
PIK3CA	Gastric_Adenocarcinoma	53	377	12.3256	605	2993	-4.48932	0.0187366	1
IGF2	Colorectal_Adenocarcinoma	12	969	1.22324	14	3033	0.763773	0.0187738	1
PML	Cervical_Carcinoma	3	47	6	43	3935	4.91905	0.0187888	1
APOBEC3A	Breast_Adenocarcinoma	8	594	1.3289	16	3410	0.861887	0.01914	1
EPHB4	Gallbladder_Cancer	5	69	6.75676	80	3874	4.73349	0.0191641	1
KIT	Sarcoma	24	288	7.69231	171	3545	3.09059	0.0192199	1
CYP1A2	Thyroid_Carcinoma	1	12	7.69231	5	4010	7.56777	0.0192207	1
RBMXL1	Breast_Adenocarcinoma	3	599	0.498339	59	3367	-1.22379	0.0192231	1
CHIA	Hepatocellular_Carcinoma	1	38	2.5641	1	3988	2.53903	0.0192731	1
DLG5	Hepatocellular_Carcinoma	1	38	2.5641	1	3988	2.53903	0.0192731	1
GATA3	Endometrial_Carcinoma	4	43	8.51064	85	3896	6.3755	0.0192738	1
ERCC6	Ovarian_Carcinoma	12	229	4.97925	90	3697	2.6027	0.0192971	1
AKT1	Sarcoma	1	311	0.320513	79	3637	-1.80543	0.0193399	1
MSH2	Colorectal_Adenocarcinoma	42	939	4.28135	83	2964	1.55735	0.0193643	1
COBLL1	Others	1	77	1.28205	0	3950	1.28205	0.0193644	1
ERCC6-PGBD3	Urothelial_Carcinoma	5	150	3.22581	36	3837	2.29629	0.0193687	1
SMARCB1	Thymic_Carcinoma	2	18	10	42	3966	8.9521	0.0195601	1
WHSC1L1	Thymic_Carcinoma	2	18	10	42	3966	8.9521	0.0195601	1
PPP2R1A	Melanoma	2	57	3.38983	13	3956	3.06229	0.0195968	1
SMAD2	Breast_Adenocarcinoma	21	581	3.48837	64	3362	1.6203	0.0196143	1
ARFRP1	Thymic_Carcinoma	1	19	5	3	4005	4.92515	0.0197208	1
CBR1	Thymic_Carcinoma	1	19	5	3	4005	4.92515	0.0197208	1
CDK12	Gastric_Adenocarcinoma	12	418	2.7907	193	3405	-2.57339	0.0197932	1
FANCL	Others	4	74	5.12821	50	3900	3.86238	0.0197964	1
FGF7	Renal_Cell_Carcinoma	3	48	5.88235	43	3934	4.80114	0.019806	1
STK11	Colorectal_Adenocarcinoma	8	973	0.815494	58	2989	-1.08802	0.0198431	1
CHEK2	Thymic_Carcinoma	3	17	15	116	3892	12.1058	0.0198592	1
KDM5C	Sarcoma	0	312	0	54	3662	-1.45318	0.0199545	1
CDC73	Endometrial_Carcinoma	4	43	8.51064	86	3895	6.35038	0.0200007	1
PRKDC	Neuroendocrine_Carcinoma	3	21	12.5	96	3908	10.1024	0.0200461	1
NFE2L2	Head_Neck_Carcinoma	6	220	2.65487	33	3769	1.7869	0.0200655	1
XRCC1	Ovarian_Carcinoma	5	236	2.07469	22	3765	1.49375	0.0200822	1
BCL2L11	Endometrial_Carcinoma	2	45	4.25532	17	3964	3.82829	0.0200862	1
SLAMF1	Endometrial_Carcinoma	2	45	4.25532	17	3964	3.82829	0.0200862	1
NF2	Urothelial_Carcinoma	8	147	5.16129	81	3792	3.06989	0.0201771	1
STAT1	Sarcoma	0	312	0	56	3660	-1.507	0.0202866	1
SMAD2	Cervical_Carcinoma	4	46	8	81	3897	5.9638	0.0203557	1
CIC	Pancreatic_Adenocarcinoma	1	116	0.854701	215	3696	-4.64261	0.020386	1
TNFAIP3	Prostate_Adenocarcinoma	4	55	6.77966	68	3901	5.06638	0.0203901	1
NPM1	Thymic_Carcinoma	2	18	10	43	3965	8.92715	0.0204094	1
CBL	Renal_Cell_Carcinoma	5	46	9.80392	121	3856	6.76143	0.0205698	1
C9orf114	Ampullary_Carcinoma	1	11	8.33333	6	4010	8.18393	0.0206838	1
ROCK1	Ampullary_Carcinoma	1	11	8.33333	6	4010	8.18393	0.0206838	1
STAT3	Adrenal_Carcinoma	3	27	10	77	3921	8.07404	0.0208315	1
ATRX	Cervical_Carcinoma	11	39	22	434	3544	11.09	0.0209141	1
ZNRF3	Endometrial_Carcinoma	3	44	6.38298	48	3933	5.17725	0.0209707	1
SUZ12	Thyroid_Carcinoma	2	11	15.3846	69	3946	13.6661	0.0210782	1
ABCC3	Urothelial_Carcinoma	7	148	4.51613	66	3807	2.81202	0.0211416	1
ERG	Urothelial_Carcinoma	6	149	3.87097	51	3822	2.55416	0.0211643	1
ARID1A	Cholangiocarcinoma	28	127	18.0645	448	3425	6.49726	0.0213732	1
ABCB1	Gastric_Adenocarcinoma	18	412	4.18605	82	3516	1.907	0.021474	1
NF1	Pancreatic_Adenocarcinoma	5	112	4.2735	426	3485	-6.61885	0.0214787	1
POLD1	Endometrial_Carcinoma	4	43	8.51064	88	3893	6.30014	0.0215052	1
AKT3	Cholangiocarcinoma	0	155	0	108	3765	-2.78854	0.0216496	1
WWP1	Breast_Adenocarcinoma	11	591	1.82724	27	3399	1.03915	0.021703	1
BIRC7	Gastric_Adenocarcinoma	5	425	1.16279	11	3587	0.857065	0.0218344	1
JAK3	Cholangiocarcinoma	0	155	0	112	3761	-2.89182	0.0218817	1
FANCE	Gastric_Adenocarcinoma	10	420	2.32558	34	3564	1.38061	0.0220446	1
EPHB6	Cholangiocarcinoma	0	155	0	113	3760	-2.91763	0.022058	1
EIF2B3	Endometrial_Carcinoma	2	45	4.25532	18	3963	3.80317	0.0221539	1
HTR3B	Breast_Adenocarcinoma	2	600	0.332226	0	3426	0.332226	0.0223049	1
SLC1A1	Breast_Adenocarcinoma	2	600	0.332226	0	3426	0.332226	0.0223049	1
TM9SF3	Breast_Adenocarcinoma	2	600	0.332226	0	3426	0.332226	0.0223049	1
TOE1	Breast_Adenocarcinoma	2	600	0.332226	0	3426	0.332226	0.0223049	1
FOXP1	Prostate_Adenocarcinoma	4	55	6.77966	70	3899	5.01599	0.0223192	1
DOCK2	Others	4	74	5.12821	52	3898	3.81175	0.022336	1
AXIN1	Hepatocellular_Carcinoma	3	36	7.69231	60	3929	6.18817	0.022338	1
HLA-DRB5	Thyroid_Carcinoma	1	12	7.69231	6	4009	7.54287	0.0223908	1
BCOR	Breast_Adenocarcinoma	40	562	6.64452	152	3274	2.20786	0.0224148	1
MAML1	Cervical_Carcinoma	2	48	4	17	3961	3.57265	0.0225718	1
FOXA1	Urothelial_Carcinoma	7	148	4.51613	67	3806	2.7862	0.0226203	1
EPHA2	Gastric_Adenocarcinoma	15	415	3.48837	62	3536	1.76519	0.0227228	1
BCOR	Endometrial_Carcinoma	6	41	12.766	186	3795	8.09376	0.0228215	1
TTF1	Ovarian_Carcinoma	10	231	4.14938	66	3721	2.40657	0.0229181	1
EPHA7	Endometrial_Carcinoma	5	42	10.6383	136	3845	7.22207	0.0230518	1
SMARCA4	Ovarian_Carcinoma	5	236	2.07469	202	3585	-3.25935	0.0230588	1
WRN	Endometrial_Carcinoma	4	43	8.51064	90	3891	6.2499	0.0230778	1
CCND1	Others	3	75	3.84615	29	3921	3.11198	0.0231546	1
ADH1B	Endometrial_Carcinoma	1	46	2.12766	1	3980	2.10254	0.0232034	1
CYP2F1	Endometrial_Carcinoma	1	46	2.12766	1	3980	2.10254	0.0232034	1
DLG5	Endometrial_Carcinoma	1	46	2.12766	1	3980	2.10254	0.0232034	1
KIAA2018	Endometrial_Carcinoma	1	46	2.12766	1	3980	2.10254	0.0232034	1
MBD4	Endometrial_Carcinoma	1	46	2.12766	1	3980	2.10254	0.0232034	1
SLC22A12	Endometrial_Carcinoma	1	46	2.12766	1	3980	2.10254	0.0232034	1
TMEM60	Endometrial_Carcinoma	1	46	2.12766	1	3980	2.10254	0.0232034	1
TNRC6A	Endometrial_Carcinoma	1	46	2.12766	1	3980	2.10254	0.0232034	1
TRIM59	Endometrial_Carcinoma	1	46	2.12766	1	3980	2.10254	0.0232034	1
UCP2	Endometrial_Carcinoma	1	46	2.12766	1	3980	2.10254	0.0232034	1
UGT2B7	Endometrial_Carcinoma	1	46	2.12766	1	3980	2.10254	0.0232034	1
ERCC3	Endometrial_Carcinoma	3	44	6.38298	50	3931	5.12701	0.0232119	1
ERCC2	Sarcoma	2	310	0.641026	102	3614	-2.10386	0.0232579	1
ATRX	Renal_Cell_Carcinoma	11	40	21.5686	434	3543	10.6559	0.0233783	1
ETS1	Lung_Adenocarcinoma	5	205	2.38095	27	3791	1.67378	0.0233863	1
WEE1	Urothelial_Carcinoma	5	150	3.22581	38	3835	2.24465	0.0234026	1
CDH1	Urothelial_Carcinoma	2	153	1.29032	199	3674	-3.84781	0.0234051	1
CDH1	Cholangiocarcinoma	2	153	1.29032	199	3674	-3.84781	0.0234051	1
CASP8	Others	5	73	6.41026	80	3870	4.38494	0.0235302	1
BRCA1	Pancreatic_Adenocarcinoma	2	115	1.7094	275	3636	-5.32205	0.0236213	1
ERG	Others	4	74	5.12821	53	3897	3.78643	0.0236773	1
PIK3R1	Breast_Adenocarcinoma	32	570	5.31561	114	3312	1.98812	0.0237989	1
IKZF1	Colorectal_Adenocarcinoma	6	975	0.611621	47	3000	-0.93088	0.0238978	1
CCNE1	Colorectal_Adenocarcinoma	9	972	0.917431	61	2986	-1.08454	0.0239205	1
NFKBIA	Head_Neck_Carcinoma	5	221	2.21239	25	3777	1.55484	0.0239807	1
POLQ	Sarcoma	8	304	2.5641	203	3513	-2.89876	0.0240608	1
GEN1	Urothelial_Carcinoma	7	148	4.51613	68	3805	2.76038	0.0241693	1
CSF3R	Gastric_Adenocarcinoma	11	419	2.55814	42	3556	1.39082	0.0242019	1
CD274	Endometrial_Carcinoma	2	45	4.25532	19	3962	3.77805	0.024306	1
G6PD	Endometrial_Carcinoma	2	45	4.25532	19	3962	3.77805	0.024306	1
INSRR	Colorectal_Adenocarcinoma	5	976	0.509684	3	3044	0.411226	0.0243119	1
HSPH1	Renal_Cell_Carcinoma	4	47	7.84314	84	3893	5.73099	0.0243568	1
SLC22A1	Lung_Adenocarcinoma	2	208	0.952381	3	3815	0.873806	0.0243684	1
CBFB	Endometrial_Carcinoma	3	44	6.38298	51	3930	5.10189	0.0243798	1
KIT	Endometrial_Carcinoma	6	41	12.766	189	3792	8.01841	0.024427	1
PTPRD	Others	10	68	12.8205	231	3719	6.97241	0.0245287	1
CSF1R	Thyroid_Carcinoma	2	11	15.3846	75	3940	13.5166	0.0245498	1
PRKDC	Head_Neck_Carcinoma	11	215	4.86726	88	3714	2.55269	0.0247088	1
BCR	Sarcoma	6	306	1.92308	24	3692	1.27722	0.0249689	1
HRAS	Head_Neck_Carcinoma	6	220	2.65487	35	3767	1.7343	0.0252034	1
MTOR	Colorectal_Adenocarcinoma	74	907	7.54332	169	2878	1.99688	0.0252659	1
CDC73	Colorectal_Adenocarcinoma	13	968	1.32518	77	2970	-1.2019	0.0252992	1
PRDM1	Colorectal_Adenocarcinoma	13	968	1.32518	77	2970	-1.2019	0.0252992	1
CYP2C9	Colorectal_Adenocarcinoma	1	980	0.101937	22	3025	-0.620085	0.0254595	1
IKBKE	Urothelial_Carcinoma	5	150	3.22581	39	3834	2.21884	0.0256087	1
LATS1	Colorectal_Adenocarcinoma	35	946	3.56779	67	2980	1.3689	0.0256453	1
TEAD2	Breast_Adenocarcinoma	0	602	0	27	3399	-0.788091	0.0256645	1
MAP3K1	Colorectal_Adenocarcinoma	31	950	3.16004	148	2899	-1.6972	0.0256839	1
EGFR	Colorectal_Adenocarcinoma	25	956	2.54842	126	2921	-1.58679	0.025751	1
RAD51C	Thyroid_Carcinoma	2	11	15.3846	77	3938	13.4668	0.0257565	1
FGF7	Gastric_Adenocarcinoma	10	420	2.32558	36	3562	1.32503	0.0260781	1
PDGFRA	Thymic_Carcinoma	3	17	15	129	3879	11.7814	0.026079	1
RB1	Colorectal_Adenocarcinoma	58	923	5.91233	247	2800	-2.194	0.0261752	1
SF3B1	Head_Neck_Carcinoma	15	211	6.63717	133	3669	3.13901	0.0261977	1
ROS1	Sarcoma	14	298	4.48718	295	3421	-3.45146	0.0263416	1
CTNNB1	Sarcoma	7	305	2.24359	187	3529	-2.7887	0.026513	1
TPMT	Endometrial_Carcinoma	2	45	4.25532	20	3961	3.75293	0.0265403	1
SH2B3	Urothelial_Carcinoma	6	149	3.87097	54	3819	2.4767	0.0265866	1
PAK3	Ovarian_Carcinoma	6	235	2.48963	33	3754	1.61822	0.0266326	1
FANCA	Others	6	72	7.69231	113	3837	4.83155	0.0266898	1
AURKA	Breast_Adenocarcinoma	20	582	3.32226	62	3364	1.51257	0.0267276	1
STAG2	Breast_Adenocarcinoma	39	563	6.47841	148	3278	2.1585	0.0267838	1
TP53	Cholangiocarcinoma	61	94	39.3548	1876	1997	-9.08306	0.0270006	1
ERCC3	Head_Neck_Carcinoma	7	219	3.09735	46	3756	1.88746	0.02709	1
RAB35	Lung_Adenocarcinoma	3	207	1.42857	10	3808	1.16665	0.027103	1
DOT1L	Urothelial_Carcinoma	10	145	6.45161	114	3759	3.50816	0.0271665	1
STAT1	Colorectal_Adenocarcinoma	21	960	2.14067	35	3012	0.992002	0.0273605	1
FOXL2	Colorectal_Adenocarcinoma	4	977	0.407747	37	3010	-0.806562	0.0274853	1
PAK1	Colorectal_Adenocarcinoma	4	977	0.407747	37	3010	-0.806562	0.0274853	1
SETBP1	Others	7	71	8.97436	146	3804	5.27816	0.0274908	1
LRP6	Ovarian_Carcinoma	19	222	7.88382	173	3614	3.31556	0.0275225	1
GSK3B	Breast_Adenocarcinoma	9	593	1.49502	19	3407	0.940434	0.027543	1
SEMA3A	Breast_Adenocarcinoma	9	593	1.49502	19	3407	0.940434	0.027543	1
SMAD4	Gallbladder_Cancer	11	63	14.8649	300	3654	7.27761	0.0275742	1
TP53	Endometrial_Carcinoma	15	32	31.9149	1922	2059	-16.3644	0.0275924	1
SETD2	Colorectal_Adenocarcinoma	98	883	9.98981	235	2812	2.2773	0.0276979	1
UBR5	Colorectal_Adenocarcinoma	11	970	1.1213	13	3034	0.694656	0.0279067	1
BRIP1	Renal_Cell_Carcinoma	6	45	11.7647	179	3798	7.26383	0.0279357	1
DIS3	Lung_Adenocarcinoma	11	199	5.2381	98	3720	2.67131	0.0280517	1
NF2	Others	5	73	6.41026	84	3866	4.28367	0.0280575	1
ARAF	Endometrial_Carcinoma	3	44	6.38298	54	3927	5.02654	0.0280721	1
PGR	Gastric_Adenocarcinoma	0	430	0	36	3562	-1.00056	0.028105	1
BAP1	Colorectal_Adenocarcinoma	16	965	1.63099	89	2958	-1.28992	0.0281697	1
RAF1	Cervical_Carcinoma	4	46	8	90	3888	5.73756	0.0282696	1
NCOR1	Ovarian_Carcinoma	24	217	9.95851	233	3554	3.80588	0.0282791	1
CDH5	Sarcoma	1	311	0.320513	75	3641	-1.69779	0.0283097	1
SUFU	Renal_Cell_Carcinoma	2	49	3.92157	19	3958	3.44382	0.0283126	1
NOTCH1	Head_Neck_Carcinoma	19	207	8.40708	187	3615	3.48862	0.0283265	1
RICTOR	Sarcoma	9	303	2.88462	214	3502	-2.87427	0.0285422	1
CSF1R	Sarcoma	1	311	0.320513	76	3640	-1.7247	0.0286079	1
CYP3A4	Thyroid_Carcinoma	1	12	7.69231	8	4007	7.49305	0.0287026	1
FAM175A	Renal_Cell_Carcinoma	3	48	5.88235	50	3927	4.62512	0.0287388	1
CTCF	Breast_Adenocarcinoma	16	586	2.65781	46	3380	1.31513	0.0287894	1
SLX4	Colorectal_Adenocarcinoma	14	967	1.42712	81	2966	-1.23124	0.0288195	1
CYP2C9	Endometrial_Carcinoma	2	45	4.25532	21	3960	3.72781	0.0288546	1
DBH	Pancreatic_Adenocarcinoma	1	116	0.854701	0	3911	0.854701	0.0290467	1
GHSR	Pancreatic_Adenocarcinoma	1	116	0.854701	0	3911	0.854701	0.0290467	1
AGTR1	Prostate_Adenocarcinoma	1	58	1.69492	1	3968	1.66972	0.029084	1
CHEK2	Prostate_Adenocarcinoma	5	54	8.47458	114	3855	5.60232	0.0290934	1
FGF14	Urothelial_Carcinoma	7	148	4.51613	71	3802	2.68292	0.0292515	1
TET2	Breast_Adenocarcinoma	43	559	7.14286	169	3257	2.20999	0.0292691	1
PRDM1	Others	5	73	6.41026	85	3865	4.25836	0.0292703	1
PLCG1	Breast_Adenocarcinoma	30	572	4.98339	109	3317	1.80184	0.0293698	1
CYP2C8	Ampullary_Carcinoma	1	11	8.33333	9	4007	8.10923	0.0294277	1
MNS1	Ampullary_Carcinoma	1	11	8.33333	9	4007	8.10923	0.0294277	1
TCEB3	Ampullary_Carcinoma	1	11	8.33333	9	4007	8.10923	0.0294277	1
PRSS8	Thymic_Carcinoma	1	19	5	5	4003	4.87525	0.0294421	1
FUBP1	Urothelial_Carcinoma	4	151	2.58065	27	3846	1.88351	0.0295534	1
RB1	Breast_Adenocarcinoma	59	543	9.80066	246	3180	2.62028	0.0295959	1
TYMS	Colorectal_Adenocarcinoma	0	981	0	15	3032	-0.492287	0.0296556	1
FANCL	Head_Neck_Carcinoma	7	219	3.09735	47	3755	1.86115	0.0296942	1
CDH1	Pancreatic_Adenocarcinoma	1	116	0.854701	200	3711	-4.25908	0.0296978	1
RAD51C	Sarcoma	1	311	0.320513	78	3638	-1.77852	0.0297309	1
EGFR	Cholangiocarcinoma	1	154	0.645161	150	3723	-3.22781	0.0299175	1
CUL4A	Colorectal_Adenocarcinoma	7	974	0.713558	51	2996	-0.96022	0.0299356	1
CHD2	Renal_Cell_Carcinoma	3	48	5.88235	51	3926	4.59998	0.0301632	1
PARP4	Lung_Adenocarcinoma	1	209	0.47619	114	3704	-2.50967	0.0301929	1
SETBP1	Sarcoma	5	307	1.60256	148	3568	-2.38021	0.0304268	1
RSF1	Urothelial_Carcinoma	10	145	6.45161	118	3755	3.40488	0.0305041	1
ABCC1	Ovarian_Carcinoma	10	231	4.14938	73	3714	2.22173	0.0306521	1
PIK3CD	Urothelial_Carcinoma	6	149	3.87097	56	3817	2.42506	0.0306729	1
DOCK2	Thymic_Carcinoma	2	18	10	54	3954	8.65269	0.0307321	1
CALR	Esophageal_Carcinoma	2	41	4.65116	24	3961	4.0489	0.0307669	1
MED12	Prostate_Adenocarcinoma	7	52	11.8644	201	3768	6.80016	0.0307736	1
TSC1	Sarcoma	5	307	1.60256	151	3565	-2.46095	0.0308606	1
FOXP1	Breast_Adenocarcinoma	18	584	2.99003	56	3370	1.35547	0.0309462	1
WISP3	Breast_Adenocarcinoma	6	596	0.996678	11	3415	0.675604	0.0310556	1
PIK3CD	Others	4	74	5.12821	58	3892	3.65985	0.0311118	1
CYP2B6	Ovarian_Carcinoma	3	238	1.24481	9	3778	1.00716	0.0311145	1
FGF23	Head_Neck_Carcinoma	6	220	2.65487	37	3765	1.6817	0.0311523	1
MDM4	Head_Neck_Carcinoma	6	220	2.65487	37	3765	1.6817	0.0311523	1
DIS3	Colorectal_Adenocarcinoma	17	964	1.73293	92	2955	-1.28644	0.0312884	1
FANCM	Melanoma	0	59	0	257	3712	-6.47518	0.0313212	1
SLCO1A2	Esophageal_Carcinoma	1	42	2.32558	2	3983	2.27539	0.0316929	1
TCERG1	Gastric_Adenocarcinoma	2	428	0.465116	1	3597	0.437323	0.0316994	1
CDK8	Thymic_Carcinoma	2	18	10	55	3953	8.62774	0.0317557	1
FBXW7	Prostate_Adenocarcinoma	0	59	0	271	3698	-6.82792	0.0317719	1
FBXW7	Melanoma	0	59	0	271	3698	-6.82792	0.0317719	1
SULT1E1	Thyroid_Carcinoma	1	12	7.69231	9	4006	7.46815	0.0318444	1
TGFBR1	Colorectal_Adenocarcinoma	9	972	0.917431	59	2988	-1.0189	0.0319688	1
MLLT3	Endometrial_Carcinoma	4	43	8.51064	100	3881	5.99871	0.0319868	1
DPYD	Sarcoma	4	308	1.28205	131	3585	-2.24324	0.0320345	1
POLQ	Gallbladder_Cancer	0	74	0	211	3743	-5.33637	0.0321946	1
KDR	Prostate_Adenocarcinoma	7	52	11.8644	203	3766	6.74977	0.0322	1
PBRM1	Breast_Adenocarcinoma	48	554	7.97342	194	3232	2.31084	0.0322148	1
EPHB1	Head_Neck_Carcinoma	12	214	5.30973	99	3703	2.70584	0.0322168	1
CYP2S1	Sarcoma	2	310	0.641026	2	3714	0.587204	0.032313	1
PRKDC	Colorectal_Adenocarcinoma	15	966	1.52905	84	2963	-1.22776	0.0323249	1
JAK1	Breast_Adenocarcinoma	31	571	5.1495	114	3312	1.82201	0.032328	1
CHD2	Breast_Adenocarcinoma	14	588	2.32558	40	3386	1.15804	0.0324457	1
SEC31A	Colorectal_Adenocarcinoma	11	970	1.1213	14	3033	0.661836	0.0325734	1
LRP6	Renal_Cell_Carcinoma	6	45	11.7647	186	3791	7.08781	0.0327462	1
SMARCA1	Urothelial_Carcinoma	12	143	7.74194	150	3723	3.86897	0.0327605	1
GRIN2A	Thymic_Carcinoma	2	18	10	56	3952	8.60279	0.0327929	1
CCND1	Urothelial_Carcinoma	4	151	2.58065	28	3845	1.85769	0.0327947	1
PRDM1	Thyroid_Carcinoma	2	11	15.3846	88	3927	13.1928	0.032819	1
FGF14	Colorectal_Adenocarcinoma	11	970	1.1213	67	2980	-1.07758	0.0328416	1
DNMT1	Pancreatic_Adenocarcinoma	0	117	0	133	3778	-3.40066	0.0329284	1
ASXL1	Others	6	72	7.69231	119	3831	4.67965	0.0329477	1
BAP1	Endometrial_Carcinoma	4	43	8.51064	101	3880	5.97359	0.0329751	1
ETV6	Cholangiocarcinoma	5	150	3.22581	42	3831	2.14138	0.0330105	1
APCDD1	Colorectal_Adenocarcinoma	6	975	0.611621	45	3002	-0.865242	0.033011	1
FANCG	Colorectal_Adenocarcinoma	6	975	0.611621	45	3002	-0.865242	0.033011	1
IRF4	Others	2	76	2.5641	13	3937	2.23499	0.033023	1
CDC73	Head_Neck_Carcinoma	10	216	4.42478	80	3722	2.32062	0.033127	1
HLA-DRB1	Colorectal_Adenocarcinoma	6	975	0.611621	46	3001	-0.898061	0.0332114	1
FOXL2	Ovarian_Carcinoma	6	235	2.48963	35	3752	1.56541	0.0332477	1
SPEN	Endometrial_Carcinoma	7	40	14.8936	260	3721	8.36259	0.0333091	1
UGT1A5	Ovarian_Carcinoma	4	237	1.65975	17	3770	1.21085	0.0334192	1
PRKAR1A	Breast_Adenocarcinoma	5	597	0.830565	8	3418	0.597056	0.033441	1
CREBBP	Melanoma	0	59	0	282	3687	-7.10506	0.0334705	1
LAMP1	Endometrial_Carcinoma	2	45	4.25532	23	3958	3.67757	0.0337154	1
SEC31A	Endometrial_Carcinoma	2	45	4.25532	23	3958	3.67757	0.0337154	1
BCL2	Gallbladder_Cancer	2	72	2.7027	14	3940	2.34863	0.033836	1
ROBO2	Thymic_Carcinoma	2	18	10	57	3951	8.57784	0.0338435	1
RAD52	Thymic_Carcinoma	1	19	5	6	4002	4.8503	0.0342684	1
PIK3CA	Lung_Adenocarcinoma	23	187	10.9524	635	3183	-5.67936	0.0343255	1
PHF6	Breast_Adenocarcinoma	9	593	1.49502	21	3405	0.882057	0.0343343	1
KCNJ5	Urothelial_Carcinoma	3	152	1.93548	16	3857	1.52237	0.0344372	1
SOCS1	Urothelial_Carcinoma	3	152	1.93548	16	3857	1.52237	0.0344372	1
CUL4A	Cervical_Carcinoma	3	47	6	55	3923	4.6174	0.0344419	1
FANCE	Head_Neck_Carcinoma	6	220	2.65487	38	3764	1.65539	0.0344435	1
WHSC1L1	Head_Neck_Carcinoma	6	220	2.65487	38	3764	1.65539	0.0344435	1
SMARCA4	Lung_Adenocarcinoma	18	192	8.57143	189	3629	3.62119	0.0345614	1
KMT2A	Cervical_Carcinoma	9	41	18	334	3644	9.60382	0.034579	1
CYP1B1	Endometrial_Carcinoma	1	46	2.12766	2	3979	2.07742	0.0346066	1
GABRB2	Endometrial_Carcinoma	1	46	2.12766	2	3979	2.07742	0.0346066	1
NT5C1A	Endometrial_Carcinoma	1	46	2.12766	2	3979	2.07742	0.0346066	1
RRM1	Endometrial_Carcinoma	1	46	2.12766	2	3979	2.07742	0.0346066	1
SLCO1A2	Endometrial_Carcinoma	1	46	2.12766	2	3979	2.07742	0.0346066	1
SLIT2	Breast_Adenocarcinoma	16	586	2.65781	49	3377	1.22757	0.0346071	1
PPP2R2A	Breast_Adenocarcinoma	5	597	0.830565	71	3355	-1.24182	0.0349063	1
CHD1	Thymic_Carcinoma	2	18	10	58	3950	8.55289	0.0349073	1
KRAS	Hepatocellular_Carcinoma	2	37	5.12821	709	3280	-12.6457	0.0349186	1
VHL	Neuroendocrine_Carcinoma	2	22	8.33333	48	3956	7.13453	0.0350289	1
BMPR2	Ampullary_Carcinoma	1	11	8.33333	11	4005	8.05943	0.0352171	1
FGFR2	Breast_Adenocarcinoma	26	576	4.31894	92	3334	1.63359	0.0352861	1
AREG	Urothelial_Carcinoma	2	153	1.29032	6	3867	1.1354	0.0353667	1
DICER1	Endometrial_Carcinoma	5	42	10.6383	153	3828	6.79504	0.0354484	1
CIC	Others	9	69	11.5385	207	3743	6.29796	0.0354948	1
TP53	Hepatocellular_Carcinoma	12	27	30.7692	1925	2064	-17.4885	0.0355179	1
WRN	Thyroid_Carcinoma	2	11	15.3846	92	3923	13.0932	0.0355591	1
FBXW7	Endometrial_Carcinoma	7	40	14.8936	264	3717	8.26212	0.0357242	1
TPMT	Breast_Adenocarcinoma	7	595	1.16279	15	3411	0.724962	0.0357782	1
FGFR1	Others	5	73	6.41026	90	3860	4.13178	0.0358318	1
KRAS	Thymic_Carcinoma	0	20	0	711	3297	-17.7395	0.0359221	1
ALK	Breast_Adenocarcinoma	35	567	5.81395	134	3292	1.90269	0.0361287	1
BAP1	Breast_Adenocarcinoma	8	594	1.3289	97	3329	-1.50239	0.0361847	1
BTK	Colorectal_Adenocarcinoma	15	966	1.52905	23	3024	0.774211	0.0362132	1
IGF2	Endometrial_Carcinoma	2	45	4.25532	24	3957	3.65246	0.0362577	1
SLX4	Thyroid_Carcinoma	2	11	15.3846	93	3922	13.0683	0.036258	1
ELMO1	Others	3	75	3.84615	35	3915	2.96008	0.0362708	1
WWP1	Others	3	75	3.84615	35	3915	2.96008	0.0362708	1
MSH6	Endometrial_Carcinoma	5	42	10.6383	154	3827	6.76992	0.0362854	1
REL	Renal_Cell_Carcinoma	2	49	3.92157	22	3955	3.36839	0.0363277	1
APCDD1	Neuroendocrine_Carcinoma	2	22	8.33333	49	3955	7.10956	0.0363277	1
ERBB4	Endometrial_Carcinoma	7	40	14.8936	265	3716	8.237	0.0363459	1
ARID1B	Endometrial_Carcinoma	6	41	12.766	208	3773	7.54114	0.0363906	1
ERCC2	Colorectal_Adenocarcinoma	16	965	1.63099	88	2959	-1.2571	0.0363934	1
MLLT3	Colorectal_Adenocarcinoma	16	965	1.63099	88	2959	-1.2571	0.0363934	1
HRH4	Gallbladder_Cancer	1	73	1.35135	1	3953	1.32606	0.0364098	1
IRS2	Cervical_Carcinoma	4	46	8	98	3880	5.53645	0.0366616	1
XPC	Lung_Adenocarcinoma	6	204	2.85714	42	3776	1.75709	0.036801	1
MLLT3	Ampullary_Carcinoma	2	10	16.6667	102	3914	14.1268	0.0368155	1
RAC1	Head_Neck_Carcinoma	4	222	1.76991	19	3783	1.27017	0.0368263	1
KDM6A	Thymic_Carcinoma	3	17	15	148	3860	11.3074	0.0368722	1
CDH2	Breast_Adenocarcinoma	24	578	3.98671	82	3344	1.59325	0.0368948	1
MRE11A	Breast_Adenocarcinoma	24	578	3.98671	82	3344	1.59325	0.0368948	1
FGFR3	Endometrial_Carcinoma	4	43	8.51064	105	3876	5.87311	0.0371079	1
BRIP1	Gastric_Adenocarcinoma	11	419	2.55814	174	3424	-2.27788	0.0371106	1
PAK7	Colorectal_Adenocarcinoma	10	971	1.01937	62	2985	-1.01542	0.0373803	1
CTNNB1	Hepatocellular_Carcinoma	5	34	12.8205	189	3800	8.08248	0.0374328	1
DPYS	Renal_Cell_Carcinoma	1	50	1.96078	2	3975	1.9105	0.0375144	1
FGFR4	Endometrial_Carcinoma	3	44	6.38298	61	3920	4.8507	0.0377833	1
ESR1	Esophageal_Carcinoma	3	40	6.97674	67	3918	5.29544	0.0378052	1
ABCC3	Colorectal_Adenocarcinoma	10	971	1.01937	63	2984	-1.04824	0.0378571	1
SLCO1B1	Gallbladder_Cancer	2	72	2.7027	15	3939	2.32334	0.0378989	1
BCL6	Others	4	74	5.12821	62	3888	3.55858	0.0379485	1
FAT1	Head_Neck_Carcinoma	20	206	8.84956	208	3594	3.37875	0.0380132	1
CYP2B6	Thyroid_Carcinoma	1	12	7.69231	11	4004	7.41834	0.0380999	1
CDH2	Ampullary_Carcinoma	2	10	16.6667	104	3912	14.077	0.0381259	1
SMARCA4	Urothelial_Carcinoma	14	141	9.03226	193	3680	4.04904	0.0381287	1
C11orf30	Thymic_Carcinoma	2	18	10	61	3947	8.47804	0.0381771	1
TBC1D23	Colorectal_Adenocarcinoma	9	972	0.917431	11	3036	0.55642	0.0383255	1
CYP1A1	Others	1	77	1.28205	1	3949	1.25673	0.0383586	1
MTRR	Others	1	77	1.28205	1	3949	1.25673	0.0383586	1
PAX7	Lung_Adenocarcinoma	4	206	1.90476	21	3797	1.35474	0.0383694	1
IL6R	Urothelial_Carcinoma	1	154	0.645161	0	3873	0.645161	0.0384806	1
KIR2DL1	Urothelial_Carcinoma	1	154	0.645161	0	3873	0.645161	0.0384806	1
MS4A2	Urothelial_Carcinoma	1	154	0.645161	0	3873	0.645161	0.0384806	1
PEAR1	Cholangiocarcinoma	1	154	0.645161	0	3873	0.645161	0.0384806	1
PER3	Urothelial_Carcinoma	1	154	0.645161	0	3873	0.645161	0.0384806	1
POLA2	Urothelial_Carcinoma	1	154	0.645161	0	3873	0.645161	0.0384806	1
SCN5A	Urothelial_Carcinoma	1	154	0.645161	0	3873	0.645161	0.0384806	1
TLR2	Cholangiocarcinoma	1	154	0.645161	0	3873	0.645161	0.0384806	1
G6PD	Colorectal_Adenocarcinoma	1	980	0.101937	20	3027	-0.554447	0.0388085	1
RPTOR	Endometrial_Carcinoma	4	43	8.51064	107	3874	5.82287	0.0392825	1
HELQ	Endometrial_Carcinoma	3	44	6.38298	62	3919	4.82558	0.0392947	1
FGF3	Breast_Adenocarcinoma	9	593	1.49502	22	3404	0.852868	0.0392961	1
LMAN1	Breast_Adenocarcinoma	0	602	0	24	3402	-0.700525	0.0394401	1
UBR5	Breast_Adenocarcinoma	0	602	0	24	3402	-0.700525	0.0394401	1
MTOR	Thyroid_Carcinoma	3	10	23.0769	240	3775	17.0993	0.0395298	1
BRCA1	Endometrial_Carcinoma	7	40	14.8936	270	3711	8.1114	0.0395641	1
SYK	Others	4	74	5.12821	63	3887	3.53327	0.0397825	1
CHUK	Cervical_Carcinoma	4	46	8	101	3877	5.46104	0.0401444	1
HDAC2	Lung_Adenocarcinoma	6	204	2.85714	43	3775	1.7309	0.0401845	1
MTHFR	Prostate_Adenocarcinoma	2	57	3.38983	20	3949	2.88593	0.0403882	1
SLIT2	Thymic_Carcinoma	2	18	10	63	3945	8.42814	0.0404207	1
CARD11	Gastric_Adenocarcinoma	16	414	3.72093	76	3522	1.60865	0.0405614	1
TMPRSS2	Breast_Adenocarcinoma	11	591	1.82724	29	3397	0.980774	0.0406177	1
RBMXL1	Lung_Adenocarcinoma	7	203	3.33333	55	3763	1.89279	0.040748	1
STK11	Endometrial_Carcinoma	3	44	6.38298	63	3918	4.80046	0.0408367	1
U2AF1	Ovarian_Carcinoma	6	235	2.48963	37	3750	1.5126	0.0408461	1
WEE1	Ovarian_Carcinoma	6	235	2.48963	37	3750	1.5126	0.0408461	1
ATRX	Adrenal_Carcinoma	7	23	23.3333	438	3560	12.3779	0.0409633	1
FGF8	Ampullary_Carcinoma	1	11	8.33333	13	4003	8.00963	0.0409748	1
SMO	Sarcoma	1	311	0.320513	68	3648	-1.50941	0.0409978	1
MEF2B	Neuroendocrine_Carcinoma	1	23	4.16667	6	3998	4.01682	0.0409999	1
RSF1	Lung_Adenocarcinoma	12	198	5.71429	116	3702	2.67605	0.0411285	1
DNMT3A	Colorectal_Adenocarcinoma	20	961	2.03874	101	2946	-1.276	0.0411974	1
LATS1	Thyroid_Carcinoma	2	11	15.3846	100	3915	12.894	0.0413008	1
PDGFRA	Others	6	72	7.69231	126	3824	4.50243	0.0413777	1
LRP6	Gastric_Adenocarcinoma	12	418	2.7907	180	3418	-2.21208	0.0413792	1
RPTOR	Ampullary_Carcinoma	2	10	16.6667	109	3907	13.9525	0.0414814	1
KIF5B	Cholangiocarcinoma	7	148	4.51613	77	3796	2.52801	0.0414855	1
EPHB6	Endometrial_Carcinoma	4	43	8.51064	109	3872	5.77263	0.0415293	1
DPYD	Colorectal_Adenocarcinoma	43	938	4.38328	92	2955	1.36392	0.0416627	1
SPOP	Others	4	74	5.12821	64	3886	3.50795	0.0416667	1
CRBN	Others	2	76	2.5641	15	3935	2.18436	0.0417236	1
SEC31A	Breast_Adenocarcinoma	0	602	0	25	3401	-0.729714	0.0418203	1
GNA11	Gastric_Adenocarcinoma	4	426	0.930233	9	3589	0.680094	0.0418836	1
SLIT2	Gastric_Adenocarcinoma	2	428	0.465116	63	3535	-1.28586	0.0420608	1
ERCC6	Lung_Adenocarcinoma	10	200	4.7619	92	3726	2.35227	0.0423094	1
SYK	Endometrial_Carcinoma	3	44	6.38298	64	3917	4.77534	0.0424093	1
STAG2	Lung_Adenocarcinoma	16	194	7.61905	171	3647	3.14026	0.04246	1
PIK3C3	Colorectal_Adenocarcinoma	9	972	0.917431	57	2990	-0.953261	0.0425024	1
FGFR1	Head_Neck_Carcinoma	10	216	4.42478	85	3717	2.18911	0.0425723	1
DNMT1	Others	6	72	7.69231	127	3823	4.47712	0.0426842	1
CTCF	Renal_Cell_Carcinoma	3	48	5.88235	59	3918	4.39882	0.0428778	1
KMT2A	Pancreatic_Adenocarcinoma	4	113	3.4188	339	3572	-5.24906	0.042892	1
AR	Ovarian_Carcinoma	33	208	13.6929	360	3427	4.18674	0.0429551	1
CREBBP	Endometrial_Carcinoma	7	40	14.8936	275	3706	7.9858	0.0429672	1
MRE11A	Adrenal_Carcinoma	3	27	10	103	3895	7.42371	0.0429877	1
ARID2	Sarcoma	12	300	3.84615	255	3461	-3.01606	0.0430033	1
SLC3A2	Colorectal_Adenocarcinoma	8	973	0.815494	9	3038	0.520122	0.0430684	1
DOCK2	Neuroendocrine_Carcinoma	2	22	8.33333	54	3950	6.98468	0.0430963	1
EPHX1	Prostate_Adenocarcinoma	1	58	1.69492	2	3967	1.64452	0.0433125	1
EGF	Colorectal_Adenocarcinoma	11	970	1.1213	66	2981	-1.04476	0.0433256	1
TNKS	Thymic_Carcinoma	3	17	15	158	3850	11.0579	0.0433594	1
SDHB	Cervical_Carcinoma	2	48	4	25	3953	3.37154	0.0435141	1
BAX	Gastric_Adenocarcinoma	6	424	1.39535	19	3579	0.867278	0.043537	1
PAX7	Gastric_Adenocarcinoma	6	424	1.39535	19	3579	0.867278	0.043537	1
RUNX1	Others	4	74	5.12821	65	3885	3.48264	0.043601	1
CYP2C9	Prostate_Adenocarcinoma	2	57	3.38983	21	3948	2.86073	0.0438258	1
RPA1	Melanoma	2	57	3.38983	21	3948	2.86073	0.0438258	1
FAT1	Lung_Adenocarcinoma	19	191	9.04762	209	3609	3.57355	0.0438738	1
PLCG1	Hepatocellular_Carcinoma	4	35	10.2564	135	3854	6.8721	0.0438943	1
SMAD4	Cholangiocarcinoma	19	136	12.2581	292	3581	4.71869	0.0439049	1
KAT6A	Head_Neck_Carcinoma	19	207	8.40708	193	3609	3.3308	0.0439517	1
PHLPP2	Others	3	75	3.84615	38	3912	2.88413	0.0439929	1
LATS2	Endometrial_Carcinoma	3	44	6.38298	65	3916	4.75022	0.0440122	1
SMARCA1	Thymic_Carcinoma	3	17	15	159	3849	11.0329	0.0440384	1
SRC	Ovarian_Carcinoma	5	236	2.07469	28	3759	1.33532	0.0441916	1
NCOR1	Cholangiocarcinoma	4	151	2.58065	253	3620	-3.95176	0.0442413	1
GATA2	Endometrial_Carcinoma	2	45	4.25532	27	3954	3.5771	0.0443087	1
BLM	Endometrial_Carcinoma	5	42	10.6383	163	3818	6.54385	0.0443756	1
ADNP	Gastric_Adenocarcinoma	5	425	1.16279	14	3584	0.773686	0.0445266	1
SLAMF1	Gastric_Adenocarcinoma	5	425	1.16279	14	3584	0.773686	0.0445266	1
NTRK2	Endometrial_Carcinoma	4	43	8.51064	112	3869	5.69727	0.0450355	1
AKT3	Adrenal_Carcinoma	3	27	10	105	3893	7.37369	0.0450429	1
CYP2C9	Ovarian_Carcinoma	4	237	1.65975	19	3768	1.15803	0.0450551	1
ETV5	Head_Neck_Carcinoma	7	219	3.09735	52	3750	1.72964	0.0452437	1
ELMO1	Lung_Adenocarcinoma	5	205	2.38095	33	3785	1.51663	0.0453717	1
SMO	Gastric_Adenocarcinoma	13	417	3.02326	56	3542	1.46684	0.0454032	1
SMO	Endometrial_Carcinoma	3	44	6.38298	66	3915	4.7251	0.0456453	1
AURKB	Breast_Adenocarcinoma	8	594	1.3289	18	3408	0.80351	0.0456517	1
CYP2E1	Endometrial_Carcinoma	1	46	2.12766	3	3978	2.0523	0.0458795	1
DIS3	Adrenal_Carcinoma	3	27	10	106	3892	7.34867	0.0460889	1
FLT4	Colorectal_Adenocarcinoma	16	965	1.63099	86	2961	-1.19146	0.0461256	1
FANCE	Sarcoma	0	312	0	44	3672	-1.18407	0.0461414	1
CCNE1	Thymic_Carcinoma	2	18	10	68	3940	8.30339	0.0462446	1
TGFBR1	Pancreatic_Adenocarcinoma	5	112	4.2735	63	3848	2.66266	0.0463295	1
MTOR	Pancreatic_Adenocarcinoma	2	115	1.7094	241	3670	-4.45271	0.0463766	1
AXIN2	Sarcoma	0	312	0	45	3671	-1.21098	0.0463862	1
RAD50	Lung_Adenocarcinoma	3	207	1.42857	159	3659	-2.73591	0.0464748	1
EZH2	Gastric_Adenocarcinoma	15	415	3.48837	69	3529	1.57064	0.0465128	1
AKT3	Renal_Cell_Carcinoma	4	47	7.84314	104	3873	5.2281	0.0465928	1
BARD1	Renal_Cell_Carcinoma	4	47	7.84314	104	3873	5.2281	0.0465928	1
XPOT	Ampullary_Carcinoma	1	11	8.33333	15	4001	7.95983	0.046701	1
ATRX	Thyroid_Carcinoma	4	9	30.7692	441	3574	19.7854	0.0467217	1
SRSF7	Neuroendocrine_Carcinoma	1	23	4.16667	7	3997	3.99184	0.0467238	1
ACVR2A	Others	3	75	3.84615	39	3911	2.85881	0.0467354	1
KDM6A	Urothelial_Carcinoma	11	144	7.09677	140	3733	3.48201	0.0469716	1
FAT1	Prostate_Adenocarcinoma	7	52	11.8644	221	3748	6.29625	0.0470849	1
CDX2	Colorectal_Adenocarcinoma	0	981	0	12	3035	-0.39383	0.0470968	1
CYP2B6	Colorectal_Adenocarcinoma	0	981	0	12	3035	-0.39383	0.0470968	1
BCHE	Ovarian_Carcinoma	3	238	1.24481	11	3776	0.954346	0.0471417	1
HLA-B	Colorectal_Adenocarcinoma	3	978	0.30581	1	3046	0.272991	0.0471434	1
CRKL	Colorectal_Adenocarcinoma	0	981	0	13	3034	-0.426649	0.0473038	1
FAT1	Endometrial_Carcinoma	6	41	12.766	222	3759	7.18947	0.047305	1
BCL2	Lung_Adenocarcinoma	3	207	1.42857	13	3805	1.08808	0.0473249	1
RRAS2	Lung_Adenocarcinoma	3	207	1.42857	13	3805	1.08808	0.0473249	1
ITK	Thymic_Carcinoma	2	18	10	69	3939	8.27844	0.0474451	1
FANCG	Lung_Adenocarcinoma	6	204	2.85714	45	3773	1.67852	0.0475277	1
MCL1	Colorectal_Adenocarcinoma	12	969	1.22324	17	3030	0.665316	0.0475391	1
RELA	Colorectal_Adenocarcinoma	12	969	1.22324	17	3030	0.665316	0.0475391	1
ABCG2	Ovarian_Carcinoma	7	234	2.90456	49	3738	1.61066	0.047562	1
NF1	Gastric_Adenocarcinoma	34	396	7.90698	397	3201	-3.12693	0.0475748	1
STK11	Cervical_Carcinoma	3	47	6	63	3915	4.41629	0.0476938	1
HLA-DRB5	Lung_Adenocarcinoma	2	208	0.952381	5	3813	0.821422	0.0477608	1
UGT1A4	Lung_Adenocarcinoma	2	208	0.952381	5	3813	0.821422	0.0477608	1
BAP1	Head_Neck_Carcinoma	11	215	4.86726	94	3708	2.39487	0.0478097	1
NTRK2	Gastric_Adenocarcinoma	6	424	1.39535	110	3488	-1.66191	0.0478352	1
ZBTB16	Sarcoma	0	312	0	47	3669	-1.2648	0.0480813	1
ATM	Lung_Adenocarcinoma	34	176	16.1905	442	3376	4.61373	0.0480912	1
RET	Thyroid_Carcinoma	2	11	15.3846	109	3906	12.6698	0.0481578	1
RUNX1T1	Head_Neck_Carcinoma	4	222	1.76991	21	3781	1.21757	0.0482338	1
CHD1	Colorectal_Adenocarcinoma	8	973	0.815494	52	2995	-0.891102	0.0482557	1
NCOA3	Urothelial_Carcinoma	11	144	7.09677	142	3731	3.43037	0.0484042	1
PGR	Head_Neck_Carcinoma	5	221	2.21239	31	3771	1.39703	0.0484114	1
SRSF1	Thymic_Carcinoma	1	19	5	9	3999	4.77545	0.0486107	1
PAK7	Thymic_Carcinoma	2	18	10	70	3938	8.25349	0.0486573	1
TNFAIP3	Thymic_Carcinoma	2	18	10	70	3938	8.25349	0.0486573	1
FANCA	Endometrial_Carcinoma	4	43	8.51064	115	3866	5.62192	0.0487046	1
KCNMA1	Endometrial_Carcinoma	4	43	8.51064	115	3866	5.62192	0.0487046	1
RAD51D	Gallbladder_Cancer	3	71	4.05405	42	3912	2.99184	0.0487214	1
CDK12	Ovarian_Carcinoma	19	222	7.88382	186	3601	2.97228	0.0487262	1
CYP2S1	Cervical_Carcinoma	1	49	2	3	3975	1.92459	0.0487534	1
STAT3	Colorectal_Adenocarcinoma	12	969	1.22324	68	2979	-1.00846	0.0487992	1
BRIP1	Gallbladder_Cancer	0	74	0	185	3769	-4.67881	0.0489477	1
CHD4	Gallbladder_Cancer	0	74	0	189	3765	-4.77997	0.0490619	1
EPHA5	Breast_Adenocarcinoma	11	591	1.82724	31	3395	0.922397	0.0491113	1
CYP2C8	Breast_Adenocarcinoma	4	598	0.664452	6	3420	0.48932	0.0491696	1
MAP2K4	Renal_Cell_Carcinoma	4	47	7.84314	106	3871	5.17781	0.0492835	1
PIK3CA	Prostate_Adenocarcinoma	4	55	6.77966	654	3315	-9.69804	0.0493689	1
BCOR	Gallbladder_Cancer	0	74	0	192	3762	-4.85584	0.0493871	1
NPM1	Ovarian_Carcinoma	6	235	2.48963	39	3748	1.45979	0.0494617	1
NSD1	Breast_Adenocarcinoma	43	559	7.14286	174	3252	2.06405	0.049538	1
IGF2R	Gallbladder_Cancer	0	74	0	193	3761	-4.88113	0.0495407	1
NUTM1	Cervical_Carcinoma	2	48	4	27	3951	3.32127	0.0495527	1
WEE1	Others	3	75	3.84615	40	3910	2.8335	0.049561	1
MLLT3	Breast_Adenocarcinoma	23	579	3.8206	81	3345	1.45632	0.0495978	1
KRAS	Adrenal_Carcinoma	1	29	3.33333	710	3288	-14.4255	0.04964	1
MITF	Others	4	74	5.12821	68	3882	3.40669	0.0497044	1
CBR1	Renal_Cell_Carcinoma	1	50	1.96078	3	3974	1.88535	0.0497099	1
NKX3-1	Renal_Cell_Carcinoma	1	50	1.96078	3	3974	1.88535	0.0497099	1
MAP3K13	Pancreatic_Adenocarcinoma	0	117	0	120	3791	-3.06827	0.0499097	1
HDAC1	Lung_Adenocarcinoma	5	205	2.38095	34	3784	1.49043	0.0499268	1
CYP2C19	Endometrial_Carcinoma	2	45	4.25532	29	3952	3.52686	0.0500103	1
FANCF	Endometrial_Carcinoma	2	45	4.25532	29	3952	3.52686	0.0500103	1
FUBP1	Endometrial_Carcinoma	2	45	4.25532	29	3952	3.52686	0.0500103	1
DNMT3A	Cholangiocarcinoma	9	146	5.80645	112	3761	2.91464	0.0500522	1
DNMT3A	Pancreatic_Adenocarcinoma	0	117	0	121	3790	-3.09384	0.0501021	1
EPHB6	Cervical_Carcinoma	4	46	8	109	3869	5.25993	0.0503334	1
AKT2	Esophageal_Carcinoma	2	41	4.65116	32	3953	3.84815	0.0503439	1
DDR2	Head_Neck_Carcinoma	11	215	4.86726	96	3706	2.34227	0.0503529	1
IKBKE	Colorectal_Adenocarcinoma	5	976	0.509684	39	3008	-0.770263	0.0504839	1
XRCC3	Colorectal_Adenocarcinoma	5	976	0.509684	39	3008	-0.770263	0.0504839	1
PRDM1	Lung_Adenocarcinoma	9	201	4.28571	81	3737	2.16418	0.0508937	1
TBX3	Prostate_Adenocarcinoma	4	55	6.77966	92	3877	4.4617	0.0509089	1
EWSR1	Thymic_Carcinoma	2	18	10	72	3936	8.20359	0.051116	1
CD79B	Others	2	76	2.5641	17	3933	2.13372	0.0511784	1
MSH2	Pancreatic_Adenocarcinoma	0	117	0	125	3786	-3.19611	0.0514377	1
TSC1	Breast_Adenocarcinoma	32	570	5.31561	124	3302	1.69623	0.0514611	1
IKZF1	Urothelial_Carcinoma	5	150	3.22581	48	3825	1.98646	0.0514807	1
BTK	Hepatocellular_Carcinoma	2	37	5.12821	36	3953	4.22572	0.0516016	1
BDNF	Lung_Adenocarcinoma	1	209	0.47619	0	3818	0.47619	0.0521351	1
CAPN10	Lung_Adenocarcinoma	1	209	0.47619	0	3818	0.47619	0.0521351	1
CES1	Lung_Adenocarcinoma	1	209	0.47619	0	3818	0.47619	0.0521351	1
CNR1	Lung_Adenocarcinoma	1	209	0.47619	0	3818	0.47619	0.0521351	1
GLCCI1	Lung_Adenocarcinoma	1	209	0.47619	0	3818	0.47619	0.0521351	1
HLA-DQB1	Lung_Adenocarcinoma	1	209	0.47619	0	3818	0.47619	0.0521351	1
LRP2	Lung_Adenocarcinoma	1	209	0.47619	0	3818	0.47619	0.0521351	1
NGFR	Lung_Adenocarcinoma	1	209	0.47619	0	3818	0.47619	0.0521351	1
SLC22A8	Lung_Adenocarcinoma	1	209	0.47619	0	3818	0.47619	0.0521351	1
RAD50	Renal_Cell_Carcinoma	5	46	9.80392	157	3820	5.85622	0.0524331	1
FANCC	Endometrial_Carcinoma	3	44	6.38298	70	3911	4.62463	0.0524767	1
EP300	Thyroid_Carcinoma	3	10	23.0769	269	3746	16.377	0.0525455	1
MLH1	Others	6	72	7.69231	134	3816	4.2999	0.0525616	1
CDH1	Breast_Adenocarcinoma	40	562	6.64452	161	3265	1.94516	0.053067	1
ESRP1	Colorectal_Adenocarcinoma	7	974	0.713558	7	3040	0.483823	0.0531458	1
SOX10	Thymic_Carcinoma	1	19	5	10	3998	4.7505	0.0533463	1
PIK3CA	Renal_Cell_Carcinoma	3	48	5.88235	655	3322	-10.5873	0.0534918	1
NCOA3	Ovarian_Carcinoma	15	226	6.22407	138	3649	2.58002	0.0536043	1
TP53BP1	Thyroid_Carcinoma	2	11	15.3846	116	3899	12.4954	0.0537663	1
NF1	Breast_Adenocarcinoma	78	524	12.9568	353	3073	2.65325	0.053814	1
BCHE	Gastric_Adenocarcinoma	4	426	0.930233	10	3588	0.6523	0.0538485	1
ATR	Others	11	67	14.1026	309	3641	6.27978	0.0540151	1
IDH1	Others	4	74	5.12821	70	3880	3.35605	0.0540231	1
SMARCA4	Gallbladder_Cancer	8	66	10.8108	199	3755	5.77793	0.054034	1
EPHA7	Others	6	72	7.69231	135	3815	4.27459	0.0540784	1
MAP2K1	Breast_Adenocarcinoma	3	599	0.498339	52	3374	-1.01947	0.0542547	1
FOXP1	Endometrial_Carcinoma	3	44	6.38298	71	3910	4.59951	0.0542584	1
RPS6KB1	Gallbladder_Cancer	3	71	4.05405	44	3910	2.94126	0.0542584	1
BCR	Renal_Cell_Carcinoma	2	49	3.92157	28	3949	3.21752	0.054581	1
CDKN2A	Sarcoma	5	307	1.60256	137	3579	-2.0842	0.0546443	1
BRCA2	Renal_Cell_Carcinoma	9	42	17.6471	375	3602	8.21784	0.054888	1
ADNP	Ampullary_Carcinoma	1	11	8.33333	18	3998	7.88513	0.0552316	1
KCNJ5	Ampullary_Carcinoma	1	11	8.33333	18	3998	7.88513	0.0552316	1
TOP1	Lung_Adenocarcinoma	9	201	4.28571	83	3735	2.1118	0.055538	1
ELMO1	Colorectal_Adenocarcinoma	4	977	0.407747	34	3013	-0.708104	0.055542	1
CSF3R	Lung_Adenocarcinoma	6	204	2.85714	47	3771	1.62613	0.0556517	1
IKZF1	Lung_Adenocarcinoma	6	204	2.85714	47	3771	1.62613	0.0556517	1
DOCK2	Breast_Adenocarcinoma	14	588	2.32558	42	3384	1.09966	0.055803	1
CBLB	Prostate_Adenocarcinoma	4	55	6.77966	95	3874	4.38611	0.0558736	1
RNF43	Pancreatic_Adenocarcinoma	8	109	6.83761	124	3787	3.66706	0.055921	1
FLI1	Endometrial_Carcinoma	2	45	4.25532	31	3950	3.47662	0.0559621	1
RHBDF2	Endometrial_Carcinoma	2	45	4.25532	31	3950	3.47662	0.0559621	1
CACNA1A	Head_Neck_Carcinoma	1	225	0.442478	0	3802	0.442478	0.0561072	1
CASP5	Head_Neck_Carcinoma	1	225	0.442478	0	3802	0.442478	0.0561072	1
KCNH2	Head_Neck_Carcinoma	1	225	0.442478	0	3802	0.442478	0.0561072	1
SLC30A8	Head_Neck_Carcinoma	1	225	0.442478	0	3802	0.442478	0.0561072	1
SULT2A1	Head_Neck_Carcinoma	1	225	0.442478	0	3802	0.442478	0.0561072	1
PIK3CA	Gallbladder_Cancer	6	68	8.10811	652	3302	-8.38152	0.056146	1
FGF14	Thymic_Carcinoma	2	18	10	76	3932	8.10379	0.0561669	1
EYA2	Ovarian_Carcinoma	3	238	1.24481	12	3775	0.92794	0.0564021	1
PPP2R1A	Ovarian_Carcinoma	3	238	1.24481	12	3775	0.92794	0.0564021	1
BRCA1	Head_Neck_Carcinoma	23	203	10.177	254	3548	3.4963	0.0565134	1
ASXL1	Endometrial_Carcinoma	4	43	8.51064	121	3860	5.4712	0.0565309	1
ABL2	Ovarian_Carcinoma	13	228	5.39419	116	3671	2.33108	0.0568762	1
ABCC2	Endometrial_Carcinoma	1	46	2.12766	4	3977	2.02718	0.0570236	1
HLA-DQA1	Endometrial_Carcinoma	1	46	2.12766	4	3977	2.02718	0.0570236	1
SUZ12	Cervical_Carcinoma	3	47	6	68	3910	4.2906	0.05708	1
INPP4B	Colorectal_Adenocarcinoma	40	941	4.07747	86	2961	1.25502	0.0572423	1
NKX3-1	Prostate_Adenocarcinoma	1	58	1.69492	3	3966	1.61933	0.057336	1
RAD51C	Thymic_Carcinoma	2	18	10	77	3931	8.07884	0.0574567	1
PTCH2	Esophageal_Carcinoma	3	40	6.97674	80	3905	4.96922	0.0577183	1
ARID1A	Thyroid_Carcinoma	4	9	30.7692	472	3543	19.0133	0.0577315	1
GNAS	Cholangiocarcinoma	11	144	7.09677	151	3722	3.19799	0.0577607	1
CDH5	Endometrial_Carcinoma	3	44	6.38298	73	3908	4.54927	0.0579088	1
TOP2A	Colorectal_Adenocarcinoma	49	932	4.9949	109	2938	1.41761	0.0580244	1
FGF12	Thymic_Carcinoma	1	19	5	11	3997	4.72555	0.0580596	1
TBC1D23	Ampullary_Carcinoma	1	11	8.33333	19	3997	7.86023	0.0580596	1
U2AF2	Neuroendocrine_Carcinoma	1	23	4.16667	9	3995	3.94189	0.0580737	1
TTF1	Others	4	74	5.12821	72	3878	3.30542	0.0585406	1
BCOR	Ovarian_Carcinoma	18	223	7.46888	174	3613	2.87421	0.0587566	1
SETD2	Pancreatic_Adenocarcinoma	4	113	3.4188	329	3582	-4.99337	0.0588177	1
KMT2D	Melanoma	2	57	3.38983	441	3528	-7.72128	0.0590971	1
ZBTB16	Ovarian_Carcinoma	6	235	2.48963	41	3746	1.40698	0.059117	1
SOCS1	Colorectal_Adenocarcinoma	1	980	0.101937	18	3029	-0.488808	0.0592352	1
EPCAM	Colorectal_Adenocarcinoma	2	979	0.203874	0	3047	0.203874	0.0592685	1
ERICH1	Colorectal_Adenocarcinoma	2	979	0.203874	0	3047	0.203874	0.0592685	1
LRP5	Colorectal_Adenocarcinoma	2	979	0.203874	0	3047	0.203874	0.0592685	1
PHACTR4	Colorectal_Adenocarcinoma	2	979	0.203874	0	3047	0.203874	0.0592685	1
VAMP8	Colorectal_Adenocarcinoma	2	979	0.203874	0	3047	0.203874	0.0592685	1
SMAD4	Ampullary_Carcinoma	3	9	25	308	3708	17.3307	0.0594763	1
PKHD1	Sarcoma	18	294	5.76923	334	3382	-3.21893	0.0594871	1
WT1	Gastric_Adenocarcinoma	10	420	2.32558	40	3558	1.21385	0.0595681	1
JAK1	Prostate_Adenocarcinoma	5	54	8.47458	140	3829	4.94724	0.059638	1
IL1B	Thyroid_Carcinoma	1	12	7.69231	18	3997	7.24399	0.0597014	1
ABCC1	Breast_Adenocarcinoma	19	583	3.15615	64	3362	1.28808	0.0597308	1
ERCC5	Endometrial_Carcinoma	3	44	6.38298	74	3907	4.52415	0.0597771	1
FOXL2	Lung_Adenocarcinoma	5	205	2.38095	36	3782	1.43805	0.0598163	1
CCNH	Ovarian_Carcinoma	1	240	0.414938	0	3787	0.414938	0.0598312	1
DCK	Ovarian_Carcinoma	1	240	0.414938	0	3787	0.414938	0.0598312	1
DCTD	Ovarian_Carcinoma	1	240	0.414938	0	3787	0.414938	0.0598312	1
HTR2C	Ovarian_Carcinoma	1	240	0.414938	0	3787	0.414938	0.0598312	1
IMPDH1	Ovarian_Carcinoma	1	240	0.414938	0	3787	0.414938	0.0598312	1
KIAA1919	Ovarian_Carcinoma	1	240	0.414938	0	3787	0.414938	0.0598312	1
KIF7	Ovarian_Carcinoma	1	240	0.414938	0	3787	0.414938	0.0598312	1
NUDT15	Ovarian_Carcinoma	1	240	0.414938	0	3787	0.414938	0.0598312	1
SPG7	Ovarian_Carcinoma	1	240	0.414938	0	3787	0.414938	0.0598312	1
SULT1C2	Ovarian_Carcinoma	1	240	0.414938	0	3787	0.414938	0.0598312	1
EP300	Sarcoma	13	299	4.16667	259	3457	-2.80319	0.059849	1
ARID2	Gallbladder_Cancer	9	65	12.1622	258	3696	5.63712	0.0598537	1
RPS6KB1	Breast_Adenocarcinoma	12	590	1.99336	35	3391	0.971756	0.0599916	1
ETS1	Colorectal_Adenocarcinoma	3	978	0.30581	29	3018	-0.645945	0.0600759	1
TBC1D23	Breast_Adenocarcinoma	0	602	0	20	3406	-0.583771	0.0601761	1
APOB	Breast_Adenocarcinoma	2	600	0.332226	1	3425	0.303037	0.0602664	1
CALU	Breast_Adenocarcinoma	2	600	0.332226	1	3425	0.303037	0.0602664	1
CRHR1	Breast_Adenocarcinoma	2	600	0.332226	1	3425	0.303037	0.0602664	1
EPHX1	Breast_Adenocarcinoma	2	600	0.332226	1	3425	0.303037	0.0602664	1
HLA-DRA	Breast_Adenocarcinoma	2	600	0.332226	1	3425	0.303037	0.0602664	1
CBL	Thyroid_Carcinoma	2	11	15.3846	124	3891	12.2962	0.0604547	1
INPP4B	Thyroid_Carcinoma	2	11	15.3846	124	3891	12.2962	0.0604547	1
PTCH1	Endometrial_Carcinoma	4	43	8.51064	124	3857	5.39584	0.0606867	1
C11orf30	Gastric_Adenocarcinoma	2	428	0.465116	61	3537	-1.23027	0.0606934	1
WRN	Lung_Adenocarcinoma	9	201	4.28571	85	3733	2.05942	0.0607001	1
BRCA1	Gallbladder_Cancer	1	73	1.35135	276	3678	-5.62892	0.0607001	1
TPMT	Gallbladder_Cancer	2	72	2.7027	20	3934	2.19689	0.0607102	1
MAP3K4	Breast_Adenocarcinoma	0	602	0	21	3405	-0.61296	0.0609598	1
GNAS	Colorectal_Adenocarcinoma	50	931	5.09684	112	2935	1.42109	0.0611051	1
PARP2	Lung_Adenocarcinoma	8	202	3.80952	69	3749	2.00229	0.0611211	1
GRIN2A	Breast_Adenocarcinoma	14	588	2.32558	44	3382	1.04128	0.0612169	1
UGT1A10	Ovarian_Carcinoma	2	239	0.829876	5	3782	0.697845	0.061318	1
SUFU	Others	2	76	2.5641	19	3931	2.08309	0.0613183	1
XRCC1	Head_Neck_Carcinoma	4	222	1.76991	23	3779	1.16497	0.0613765	1
NOTCH1	Sarcoma	9	303	2.88462	197	3519	-2.41678	0.061412	1
EZH2	Breast_Adenocarcinoma	19	583	3.15615	65	3361	1.25889	0.0614154	1
TFRC	Prostate_Adenocarcinoma	3	56	5.08475	59	3910	3.59823	0.0614399	1
SMAD2	Ovarian_Carcinoma	1	240	0.414938	84	3703	-1.80318	0.0615435	1
MYCN	Colorectal_Adenocarcinoma	17	964	1.73293	30	3017	0.748351	0.0615709	1
HLA-DQA1	Renal_Cell_Carcinoma	1	50	1.96078	4	3973	1.86021	0.0617538	1
SLC17A3	Renal_Cell_Carcinoma	1	50	1.96078	4	3973	1.86021	0.0617538	1
NTRK3	Colorectal_Adenocarcinoma	37	944	3.77166	79	2968	1.17895	0.0617543	1
TGFBR1	Sarcoma	1	311	0.320513	67	3649	-1.4825	0.0617946	1
PAK7	Renal_Cell_Carcinoma	3	48	5.88235	69	3908	4.14738	0.0619686	1
ZNRF3	Gastric_Adenocarcinoma	10	420	2.32558	41	3557	1.18606	0.0619691	1
RSF1	Thyroid_Carcinoma	2	11	15.3846	126	3889	12.2464	0.0621714	1
CYP3A4	Gastric_Adenocarcinoma	3	427	0.697674	6	3592	0.530915	0.0622127	1
BAP1	Sarcoma	3	309	0.961538	102	3614	-1.78335	0.0622616	1
H3F3A	Colorectal_Adenocarcinoma	1	980	0.101937	19	3028	-0.521627	0.062346	1
EPHB1	Others	5	73	6.41026	106	3844	3.72671	0.0625913	1
RET	Others	5	73	6.41026	106	3844	3.72671	0.0625913	1
STAT1	Urothelial_Carcinoma	5	150	3.22581	51	3822	1.909	0.0625942	1
FGF19	Urothelial_Carcinoma	3	152	1.93548	21	3852	1.39327	0.0626112	1
PTCH1	Cholangiocarcinoma	1	154	0.645161	127	3746	-2.63395	0.0626226	1
FANCM	Neuroendocrine_Carcinoma	4	20	16.6667	253	3751	10.348	0.0627219	1
BRD3	Thymic_Carcinoma	1	19	5	12	3996	4.7006	0.0627505	1
CDC42	Thymic_Carcinoma	1	19	5	12	3996	4.7006	0.0627505	1
CRKL	Thymic_Carcinoma	1	19	5	12	3996	4.7006	0.0627505	1
STAG2	Thymic_Carcinoma	3	17	15	184	3824	10.4092	0.0627595	1
EPHA7	Head_Neck_Carcinoma	13	213	5.75221	128	3674	2.38556	0.0628551	1
FLT3	Thyroid_Carcinoma	2	11	15.3846	127	3888	12.2215	0.0630362	1
BRD4	Colorectal_Adenocarcinoma	2	979	0.203874	24	3023	-0.583786	0.0630598	1
BAP1	Cholangiocarcinoma	8	147	5.16129	97	3776	2.65677	0.0630805	1
PTPN11	Sarcoma	2	310	0.641026	83	3633	-1.59256	0.0630837	1
CUL4B	Head_Neck_Carcinoma	6	220	2.65487	45	3757	1.47128	0.0637189	1
NT5C2	Head_Neck_Carcinoma	6	220	2.65487	45	3757	1.47128	0.0637189	1
MAP3K1	Pancreatic_Adenocarcinoma	1	116	0.854701	178	3733	-3.69656	0.0637269	1
KIT	Prostate_Adenocarcinoma	6	53	10.1695	189	3780	5.40759	0.0638526	1
PDPK1	Lung_Adenocarcinoma	3	207	1.42857	15	3803	1.0357	0.0639245	1
ABCC3	Renal_Cell_Carcinoma	3	48	5.88235	70	3907	4.12223	0.0640649	1
PRKCB	Renal_Cell_Carcinoma	3	48	5.88235	70	3907	4.12223	0.0640649	1
EPHA6	Pancreatic_Adenocarcinoma	1	116	0.854701	179	3732	-3.72213	0.0640963	1
SPOP	Colorectal_Adenocarcinoma	10	971	1.01937	58	2989	-0.884144	0.0642844	1
WEE1	Hepatocellular_Carcinoma	2	37	5.12821	41	3948	4.10038	0.0643224	1
XPC	Ovarian_Carcinoma	6	235	2.48963	42	3745	1.38057	0.0643383	1
CHD4	Thymic_Carcinoma	3	17	15	186	3822	10.3593	0.064399	1
AGXT	Cholangiocarcinoma	2	153	1.29032	9	3864	1.05794	0.0644324	1
NAT2	Urothelial_Carcinoma	2	153	1.29032	9	3864	1.05794	0.0644324	1
C9orf114	Colorectal_Adenocarcinoma	4	977	0.407747	3	3044	0.30929	0.0645858	1
RHBDF2	Renal_Cell_Carcinoma	2	49	3.92157	31	3946	3.14209	0.0646905	1
TP53	Esophageal_Carcinoma	27	16	62.7907	1910	2075	14.861	0.0647742	1
ETV5	Colorectal_Adenocarcinoma	8	973	0.815494	51	2996	-0.858283	0.0651119	1
ASNS	Endometrial_Carcinoma	2	45	4.25532	34	3947	3.40126	0.0653284	1
EPHB4	Thymic_Carcinoma	2	18	10	83	3925	7.92914	0.0654134	1
SMO	Ovarian_Carcinoma	8	233	3.3195	61	3726	1.70873	0.0654816	1
GEN1	Pancreatic_Adenocarcinoma	5	112	4.2735	70	3841	2.48368	0.0655194	1
AKT1	Endometrial_Carcinoma	3	44	6.38298	77	3904	4.44879	0.0655519	1
STAT3	Endometrial_Carcinoma	3	44	6.38298	77	3904	4.44879	0.0655519	1
RNF43	Thyroid_Carcinoma	2	11	15.3846	130	3885	12.1468	0.0656564	1
LTK	Lung_Adenocarcinoma	8	202	3.80952	71	3747	1.94991	0.0656971	1
CD274	Thyroid_Carcinoma	1	12	7.69231	20	3995	7.19418	0.0657905	1
B2M	Cervical_Carcinoma	2	48	4	32	3946	3.19558	0.0658574	1
MEF2B	Hepatocellular_Carcinoma	1	38	2.5641	6	3983	2.41369	0.065886	1
ITK	Neuroendocrine_Carcinoma	2	22	8.33333	69	3935	6.61006	0.0659013	1
SMAD4	Urothelial_Carcinoma	6	149	3.87097	305	3568	-4.00406	0.0660485	1
FOXP1	Renal_Cell_Carcinoma	3	48	5.88235	71	3906	4.09709	0.0661941	1
CRBN	Head_Neck_Carcinoma	3	223	1.32743	14	3788	0.959206	0.066203	1
ZRSR2	Head_Neck_Carcinoma	3	223	1.32743	14	3788	0.959206	0.066203	1
ESR1	Colorectal_Adenocarcinoma	24	957	2.44648	46	3001	0.936802	0.0664427	1
SDHAF2	Ovarian_Carcinoma	3	238	1.24481	13	3774	0.901534	0.0664534	1
TSHR	Colorectal_Adenocarcinoma	34	947	3.46585	72	2975	1.10287	0.0664719	1
NUP93	Melanoma	2	57	3.38983	27	3942	2.70956	0.0665321	1
DNMT1	Thyroid_Carcinoma	2	11	15.3846	131	3884	12.1219	0.0665383	1
BRAF	Gastric_Adenocarcinoma	17	413	3.95349	223	3375	-2.2444	0.0665575	1
ABL1	Others	5	73	6.41026	108	3842	3.67608	0.0665637	1
SF3A1	Others	2	76	2.5641	20	3930	2.05777	0.0666248	1
CREBBP	Others	10	68	12.8205	272	3678	5.93444	0.0667097	1
RAD54L	Thymic_Carcinoma	2	18	10	84	3924	7.90419	0.0667747	1
LRP6	Thymic_Carcinoma	3	17	15	189	3819	10.2844	0.0668967	1
PTEN	Pancreatic_Adenocarcinoma	2	115	1.7094	233	3678	-4.24815	0.0671069	1
IGF1R	Urothelial_Carcinoma	10	145	6.45161	130	3743	3.09504	0.0671768	1
ERBB4	Colorectal_Adenocarcinoma	79	902	8.05301	193	2854	1.71891	0.0673271	1
VCP	Gastric_Adenocarcinoma	4	426	0.930233	11	3587	0.624507	0.0674604	1
ZNF609	Gastric_Adenocarcinoma	4	426	0.930233	11	3587	0.624507	0.0674604	1
FOXA1	Breast_Adenocarcinoma	17	585	2.82392	57	3369	1.16017	0.0678068	1
KDR	Adrenal_Carcinoma	4	26	13.3333	206	3792	8.18076	0.0680319	1
CYP1A2	Endometrial_Carcinoma	1	46	2.12766	5	3976	2.00206	0.0680402	1
USP9X	Thymic_Carcinoma	2	18	10	85	3923	7.87924	0.0681457	1
B2M	Renal_Cell_Carcinoma	2	49	3.92157	32	3945	3.11694	0.0681911	1
BCR	Gastric_Adenocarcinoma	0	430	0	30	3568	-0.833797	0.0681973	1
FANCD2	Sarcoma	12	300	3.84615	243	3473	-2.69314	0.0683368	1
BARD1	Urothelial_Carcinoma	8	147	5.16129	100	3773	2.57931	0.0683653	1
SOX10	Breast_Adenocarcinoma	4	598	0.664452	7	3419	0.460132	0.0684018	1
MYC	Endometrial_Carcinoma	2	45	4.25532	35	3946	3.37614	0.0685606	1
CDH5	Pancreatic_Adenocarcinoma	5	112	4.2735	71	3840	2.45811	0.0685764	1
ARID1B	Gastric_Adenocarcinoma	31	399	7.2093	183	3415	2.12314	0.0685784	1
KDM6A	Prostate_Adenocarcinoma	5	54	8.47458	146	3823	4.79607	0.0685928	1
ATR	Thymic_Carcinoma	4	16	20	316	3692	12.1158	0.0686903	1
MTHFR	Thyroid_Carcinoma	1	12	7.69231	21	3994	7.16927	0.0688214	1
PDK1	Breast_Adenocarcinoma	7	595	1.16279	16	3410	0.695774	0.0689253	1
KCNMA1	Gastric_Adenocarcinoma	19	411	4.4186	100	3498	1.63928	0.068959	1
FANCM	Sarcoma	12	300	3.84615	245	3471	-2.74696	0.0690238	1
MUTYH	Gallbladder_Cancer	3	71	4.05405	49	3905	2.8148	0.0693522	1
ERCC6-PGBD3	Colorectal_Adenocarcinoma	5	976	0.509684	36	3011	-0.671806	0.0693654	1
AMER1	Colorectal_Adenocarcinoma	5	976	0.509684	37	3010	-0.704625	0.0694042	1
RAD51B	Colorectal_Adenocarcinoma	24	957	2.44648	47	3000	0.903982	0.0694262	1
KIT	Thymic_Carcinoma	3	17	15	192	3816	10.2096	0.0694399	1
ERBB3	Urothelial_Carcinoma	12	143	7.74194	168	3705	3.40421	0.06947	1
NSD1	Others	8	70	10.2564	209	3741	4.96527	0.0697073	1
HIF1A	Colorectal_Adenocarcinoma	13	968	1.32518	70	2977	-0.972163	0.0698969	1
RICTOR	Head_Neck_Carcinoma	19	207	8.40708	204	3598	3.04148	0.0699243	1
GNA13	Head_Neck_Carcinoma	2	224	0.884956	6	3796	0.727144	0.0701554	1
SMAD4	Hepatocellular_Carcinoma	0	39	0	311	3678	-7.79644	0.0703327	1
ATR	Hepatocellular_Carcinoma	0	39	0	320	3669	-8.02206	0.070485	1
NFKBIA	Melanoma	2	57	3.38983	28	3941	2.68436	0.0706306	1
RAD21	Urothelial_Carcinoma	6	149	3.87097	70	3803	2.06358	0.0707113	1
LRP6	Endometrial_Carcinoma	5	42	10.6383	187	3794	5.94099	0.0709479	1
HRAS	Urothelial_Carcinoma	4	151	2.58065	37	3836	1.62531	0.0709806	1
XPO1	Urothelial_Carcinoma	4	151	2.58065	37	3836	1.62531	0.0709806	1
LRP1B	Head_Neck_Carcinoma	40	186	17.6991	506	3296	4.39033	0.0710963	1
ABCC1	Endometrial_Carcinoma	3	44	6.38298	80	3901	4.37343	0.0715765	1
EPHA7	Colorectal_Adenocarcinoma	25	956	2.54842	116	2931	-1.2586	0.0716501	1
CSF1R	Pancreatic_Adenocarcinoma	5	112	4.2735	72	3839	2.43254	0.0717119	1
CYP2C9	Thyroid_Carcinoma	1	12	7.69231	22	3993	7.14436	0.0718432	1
HIF1A	Gastric_Adenocarcinoma	14	416	3.25581	69	3529	1.33808	0.0718851	1
FANCC	Sarcoma	10	302	3.20513	63	3653	1.50976	0.0719837	1
EYA2	Thymic_Carcinoma	1	19	5	14	3994	4.6507	0.0720659	1
PPP2R1A	Thymic_Carcinoma	1	19	5	14	3994	4.6507	0.0720659	1
SOX9	Thymic_Carcinoma	1	19	5	14	3994	4.6507	0.0720659	1
CD79A	Others	2	76	2.5641	21	3929	2.03246	0.0720785	1
PDK1	Others	2	76	2.5641	21	3929	2.03246	0.0720785	1
RAC1	Others	2	76	2.5641	21	3929	2.03246	0.0720785	1
TIPARP	Others	2	76	2.5641	21	3929	2.03246	0.0720785	1
SEC31A	Ampullary_Carcinoma	1	11	8.33333	24	3992	7.73572	0.0720833	1
AKT3	Prostate_Adenocarcinoma	4	55	6.77966	104	3865	4.15935	0.0722864	1
UGT1A4	Esophageal_Carcinoma	1	42	2.32558	6	3979	2.17502	0.0724281	1
TNFAIP3	Colorectal_Adenocarcinoma	11	970	1.1213	61	2986	-0.880664	0.0724805	1
KMT2A	Sarcoma	18	294	5.76923	325	3391	-2.97673	0.0726319	1
WRN	Ovarian_Carcinoma	10	231	4.14938	84	3703	1.93126	0.0726913	1
EGF	Renal_Cell_Carcinoma	3	48	5.88235	74	3903	4.02165	0.0727758	1
CYP1A2	Sarcoma	2	310	0.641026	4	3712	0.533383	0.0728325	1
KCNJ5	Lung_Adenocarcinoma	3	207	1.42857	16	3802	1.0095	0.0730992	1
KCNMA1	Ovarian_Carcinoma	12	229	4.97925	107	3680	2.1538	0.0731033	1
DNMT3A	Gastric_Adenocarcinoma	19	411	4.4186	102	3496	1.5837	0.0731192	1
MAD1L1	Colorectal_Adenocarcinoma	7	974	0.713558	45	3002	-0.763305	0.0732427	1
ASXL1	Breast_Adenocarcinoma	26	576	4.31894	99	3327	1.42927	0.0733048	1
ACVR2A	Sarcoma	0	312	0	42	3674	-1.13025	0.0733609	1
MAP2K7	Melanoma	0	59	0	206	3763	-5.19022	0.0735307	1
MED12	Melanoma	0	59	0	208	3761	-5.24061	0.0735609	1
EZH2	Endometrial_Carcinoma	3	44	6.38298	81	3900	4.34831	0.073639	1
CDH5	Breast_Adenocarcinoma	17	585	2.82392	59	3367	1.1018	0.0737128	1
TTF1	Breast_Adenocarcinoma	17	585	2.82392	59	3367	1.1018	0.0737128	1
BARD1	Breast_Adenocarcinoma	23	579	3.8206	85	3341	1.33957	0.0738628	1
ERCC3	Ovarian_Carcinoma	0	241	0	53	3734	-1.39952	0.0739218	1
CDH1	Lung_Adenocarcinoma	5	205	2.38095	196	3622	-2.75263	0.0741263	1
DIS3	Prostate_Adenocarcinoma	4	55	6.77966	105	3864	4.13416	0.0742485	1
IDO1	Gastric_Adenocarcinoma	7	423	1.62791	25	3573	0.933077	0.074439	1
EPHB1	Urothelial_Carcinoma	8	147	5.16129	103	3770	2.50185	0.0744831	1
ERCC3	Colorectal_Adenocarcinoma	7	974	0.713558	46	3001	-0.796124	0.0745215	1
ABL2	Cervical_Carcinoma	4	46	8	125	3853	4.85772	0.0746136	1
FGF14	Cholangiocarcinoma	0	155	0	78	3795	-2.01394	0.0747081	1
RAD51C	Urothelial_Carcinoma	0	155	0	79	3794	-2.03976	0.0747679	1
DOT1L	Gastric_Adenocarcinoma	7	423	1.62791	117	3481	-1.6239	0.0747864	1
PRKAR1A	Neuroendocrine_Carcinoma	1	23	4.16667	12	3992	3.86697	0.0748559	1
SMARCD1	Neuroendocrine_Carcinoma	1	23	4.16667	12	3992	3.86697	0.0748559	1
SRSF7	Hepatocellular_Carcinoma	1	38	2.5641	7	3982	2.38862	0.0749461	1
STAT3	Cholangiocarcinoma	0	155	0	80	3793	-2.06558	0.074974	1
PTCH1	Head_Neck_Carcinoma	12	214	5.30973	116	3686	2.25871	0.0751101	1
CHD4	Breast_Adenocarcinoma	37	565	6.14618	152	3274	1.70952	0.0751561	1
ERCC2	Pancreatic_Adenocarcinoma	0	117	0	104	3807	-2.65917	0.0751885	1
ARFRP1	Others	1	77	1.28205	3	3947	1.2061	0.075264	1
BCL2L1	Others	1	77	1.28205	3	3947	1.2061	0.075264	1
CYP2E1	Others	1	77	1.28205	3	3947	1.2061	0.075264	1
FAM46C	Others	1	77	1.28205	3	3947	1.2061	0.075264	1
UGT1A7	Others	1	77	1.28205	3	3947	1.2061	0.075264	1
CHUK	Pancreatic_Adenocarcinoma	0	117	0	105	3806	-2.68474	0.0752673	1
PGR	Renal_Cell_Carcinoma	2	49	3.92157	34	3943	3.06665	0.0753757	1
CHIA	Urothelial_Carcinoma	1	154	0.645161	1	3872	0.619342	0.0754897	1
CYP2F1	Urothelial_Carcinoma	1	154	0.645161	1	3872	0.619342	0.0754897	1
PAX4	Cholangiocarcinoma	1	154	0.645161	1	3872	0.619342	0.0754897	1
SLC22A16	Urothelial_Carcinoma	1	154	0.645161	1	3872	0.619342	0.0754897	1
SLC22A4	Cholangiocarcinoma	1	154	0.645161	1	3872	0.619342	0.0754897	1
SYCP1	Urothelial_Carcinoma	1	154	0.645161	1	3872	0.619342	0.0754897	1
DDR2	Pancreatic_Adenocarcinoma	0	117	0	107	3804	-2.73587	0.0756734	1
CASP8	Endometrial_Carcinoma	3	44	6.38298	82	3899	4.32319	0.0757282	1
PTPN11	Endometrial_Carcinoma	3	44	6.38298	82	3899	4.32319	0.0757282	1
PIK3R1	Gastric_Adenocarcinoma	9	421	2.09302	137	3461	-1.71465	0.0757803	1
PTCH2	Others	4	74	5.12821	79	3871	3.12821	0.0758924	1
PTPRD	Breast_Adenocarcinoma	46	556	7.6412	195	3231	1.94943	0.0759627	1
CTCF	Lung_Adenocarcinoma	0	210	0	62	3756	-1.62389	0.0759809	1
SDHC	Breast_Adenocarcinoma	7	595	1.16279	17	3409	0.666585	0.0759965	1
BARD1	Pancreatic_Adenocarcinoma	0	117	0	108	3803	-2.76144	0.0759994	1
CALR	Urothelial_Carcinoma	3	152	1.93548	23	3850	1.34163	0.0761182	1
KDM5A	Gallbladder_Cancer	0	74	0	174	3780	-4.40061	0.0761299	1
PARP2	Head_Neck_Carcinoma	8	218	3.53982	69	3733	1.72499	0.0761423	1
NKX2-1	Urothelial_Carcinoma	4	151	2.58065	38	3835	1.59949	0.0762077	1
SF3B1	Gastric_Adenocarcinoma	9	421	2.09302	139	3459	-1.77023	0.0763681	1
NAT2	Colorectal_Adenocarcinoma	0	981	0	11	3036	-0.361011	0.0763757	1
HIF1A	Cholangiocarcinoma	0	155	0	83	3790	-2.14304	0.0764547	1
USP9X	Gastric_Adenocarcinoma	4	426	0.930233	83	3515	-1.3766	0.0765796	1
KLHL6	Thymic_Carcinoma	1	19	5	15	3993	4.62575	0.0766905	1
USP9X	Colorectal_Adenocarcinoma	14	967	1.42712	73	2974	-0.968684	0.0767982	1
PHLPP2	Head_Neck_Carcinoma	5	221	2.21239	36	3766	1.26552	0.0769877	1
RBMXL1	Adrenal_Carcinoma	2	28	6.66667	60	3938	5.16592	0.0770068	1
EZH2	Cholangiocarcinoma	0	155	0	84	3789	-2.16886	0.0772307	1
ZRSR2	Ovarian_Carcinoma	3	238	1.24481	14	3773	0.875128	0.0772591	1
AXIN1	Lung_Adenocarcinoma	0	210	0	63	3755	-1.65008	0.0772642	1
PLCG1	Endometrial_Carcinoma	4	43	8.51064	135	3846	5.11953	0.0772871	1
PIK3CA	Hepatocellular_Carcinoma	2	37	5.12821	656	3333	-11.317	0.0773538	1
BLM	Sarcoma	7	305	2.24359	161	3555	-2.08903	0.0773711	1
ERBB2	Gastric_Adenocarcinoma	26	404	6.04651	148	3450	1.93312	0.0773913	1
CYP4A22	Sarcoma	1	311	0.320513	0	3716	0.320513	0.0774578	1
DIO2	Sarcoma	1	311	0.320513	0	3716	0.320513	0.0774578	1
F13A1	Sarcoma	1	311	0.320513	0	3716	0.320513	0.0774578	1
HTR1A	Sarcoma	1	311	0.320513	0	3716	0.320513	0.0774578	1
ITGA2	Sarcoma	1	311	0.320513	0	3716	0.320513	0.0774578	1
KCNE1	Sarcoma	1	311	0.320513	0	3716	0.320513	0.0774578	1
SLC6A9	Sarcoma	1	311	0.320513	0	3716	0.320513	0.0774578	1
MTHFR	Gastric_Adenocarcinoma	5	425	1.16279	17	3581	0.690306	0.0774706	1
TEAD2	Ampullary_Carcinoma	1	11	8.33333	26	3990	7.68592	0.0776389	1
GPR124	Others	2	76	2.5641	22	3928	2.00714	0.0776718	1
LMAN1	Others	2	76	2.5641	22	3928	2.00714	0.0776718	1
UBR5	Others	2	76	2.5641	22	3928	2.00714	0.0776718	1
PDGFRB	Endometrial_Carcinoma	3	44	6.38298	83	3898	4.29808	0.077844	1
ATM	Thymic_Carcinoma	5	15	25	471	3537	13.2485	0.0779662	1
NRAS	Thymic_Carcinoma	2	18	10	92	3916	7.70459	0.0780052	1
LTK	Pancreatic_Adenocarcinoma	5	112	4.2735	74	3837	2.38141	0.0782165	1
PIK3R1	Thyroid_Carcinoma	2	11	15.3846	144	3871	11.7981	0.0783708	1
CDH1	Sarcoma	9	303	2.88462	192	3524	-2.28223	0.0784257	1
ATM	Adrenal_Carcinoma	7	23	23.3333	469	3529	11.6025	0.0785542	1
MAD1L1	Others	3	75	3.84615	49	3901	2.60565	0.0785592	1
FAT3	Gastric_Adenocarcinoma	61	369	14.186	404	3194	2.95759	0.0785737	1
FGFR4	Lung_Adenocarcinoma	0	210	0	64	3754	-1.67627	0.0787991	1
CDKN1A	Endometrial_Carcinoma	1	46	2.12766	6	3975	1.97694	0.0789308	1
GSTP1	Endometrial_Carcinoma	1	46	2.12766	6	3975	1.97694	0.0789308	1
ROCK1	Endometrial_Carcinoma	1	46	2.12766	6	3975	1.97694	0.0789308	1
FLT3	Renal_Cell_Carcinoma	4	47	7.84314	125	3852	4.70006	0.0790459	1
LTK	Neuroendocrine_Carcinoma	2	22	8.33333	77	3927	6.41026	0.0794055	1
FGFR1	Thymic_Carcinoma	2	18	10	93	3915	7.67964	0.0794498	1
STAT4	Thymic_Carcinoma	2	18	10	93	3915	7.67964	0.0794498	1
TRRAP	Thymic_Carcinoma	2	18	10	93	3915	7.67964	0.0794498	1
FANCA	Sarcoma	4	308	1.28205	115	3601	-1.81267	0.0796055	1
ELMO1	Cervical_Carcinoma	2	48	4	36	3942	3.09502	0.0800078	1
CCNE1	Gastric_Adenocarcinoma	12	418	2.7907	58	3540	1.17869	0.0801263	1
FGF8	Neuroendocrine_Carcinoma	1	23	4.16667	13	3991	3.84199	0.080386	1
DDX27	Ampullary_Carcinoma	1	11	8.33333	27	3989	7.66102	0.0804053	1
SEMA3A	Ampullary_Carcinoma	1	11	8.33333	27	3989	7.66102	0.0804053	1
BLM	Colorectal_Adenocarcinoma	31	950	3.16004	137	2910	-1.33619	0.080538	1
MDM4	Breast_Adenocarcinoma	11	591	1.82724	32	3394	0.893209	0.080698	1
ERCC5	Colorectal_Adenocarcinoma	12	969	1.22324	65	2982	-0.910004	0.0807237	1
SUZ12	Gastric_Adenocarcinoma	3	427	0.697674	68	3530	-1.19226	0.0808072	1
TBX3	Thymic_Carcinoma	2	18	10	94	3914	7.65469	0.0809032	1
RICTOR	Adrenal_Carcinoma	4	26	13.3333	219	3779	7.85559	0.0810731	1
EPHB4	Others	4	74	5.12821	81	3869	3.07757	0.0812808	1
CCND3	Thymic_Carcinoma	1	19	5	16	3992	4.6008	0.0812933	1
CRBN	Thymic_Carcinoma	1	19	5	16	3992	4.6008	0.0812933	1
WISP3	Thymic_Carcinoma	1	19	5	16	3992	4.6008	0.0812933	1
NF1	Esophageal_Carcinoma	1	42	2.32558	430	3555	-8.46488	0.0815529	1
PKHD1	Renal_Cell_Carcinoma	8	43	15.6863	344	3633	7.03654	0.0815768	1
MAPK1	Urothelial_Carcinoma	4	151	2.58065	39	3834	1.57367	0.0816236	1
U2AF1	Urothelial_Carcinoma	4	151	2.58065	39	3834	1.57367	0.0816236	1
SPEN	Gastric_Adenocarcinoma	20	410	4.65116	247	3351	-2.21376	0.0818347	1
ERCC6-PGBD3	Endometrial_Carcinoma	2	45	4.25532	39	3942	3.27567	0.0819969	1
IDH2	Endometrial_Carcinoma	2	45	4.25532	39	3942	3.27567	0.0819969	1
TCEB3	Gastric_Adenocarcinoma	3	427	0.697674	7	3591	0.503122	0.0820519	1
HSPH1	Endometrial_Carcinoma	3	44	6.38298	85	3896	4.24784	0.0821537	1
ZNF217	Endometrial_Carcinoma	3	44	6.38298	85	3896	4.24784	0.0821537	1
NRG1	Endometrial_Carcinoma	4	43	8.51064	138	3843	5.04417	0.0821789	1
CHD4	Ovarian_Carcinoma	17	224	7.05394	172	3615	2.51209	0.0825566	1
PDCD1LG2	Gastric_Adenocarcinoma	4	426	0.930233	12	3586	0.596714	0.0826691	1
BTK	Renal_Cell_Carcinoma	2	49	3.92157	36	3941	3.01636	0.0827913	1
ELMO1	Renal_Cell_Carcinoma	2	49	3.92157	36	3941	3.01636	0.0827913	1
CEBPA	Lung_Adenocarcinoma	3	207	1.42857	17	3801	0.983312	0.0828238	1
CUL4A	Ovarian_Carcinoma	7	234	2.90456	51	3736	1.55785	0.0829978	1
DIS3	Gastric_Adenocarcinoma	6	424	1.39535	103	3495	-1.46735	0.0830725	1
FGFR3	Gastric_Adenocarcinoma	6	424	1.39535	103	3495	-1.46735	0.0830725	1
DNMT1	Breast_Adenocarcinoma	27	575	4.48505	106	3320	1.39106	0.0833168	1
FGF2	Others	2	76	2.5641	23	3927	1.98182	0.0833976	1
PAX7	Others	2	76	2.5641	23	3927	1.98182	0.0833976	1
HELQ	Adrenal_Carcinoma	2	28	6.66667	63	3935	5.09088	0.083561	1
SLIT2	Adrenal_Carcinoma	2	28	6.66667	63	3935	5.09088	0.083561	1
ETV4	Cervical_Carcinoma	2	48	4	37	3941	3.06988	0.083683	1
NFE2L2	Cervical_Carcinoma	2	48	4	37	3941	3.06988	0.083683	1
TFRC	Head_Neck_Carcinoma	7	219	3.09735	55	3747	1.65074	0.0837977	1
SDHB	Thyroid_Carcinoma	1	12	7.69231	26	3989	7.04474	0.0838401	1
FLT1	Breast_Adenocarcinoma	31	571	5.1495	124	3302	1.53012	0.0838553	1
CDK6	Breast_Adenocarcinoma	11	591	1.82724	33	3393	0.86402	0.0843279	1
FANCE	Breast_Adenocarcinoma	11	591	1.82724	33	3393	0.86402	0.0843279	1
NUP93	Colorectal_Adenocarcinoma	3	978	0.30581	26	3021	-0.547488	0.0844336	1
SEMA3E	Breast_Adenocarcinoma	9	593	1.49502	25	3401	0.765303	0.0846801	1
KAT6A	Thymic_Carcinoma	3	17	15	209	3799	9.78543	0.0846903	1
TET2	Thymic_Carcinoma	3	17	15	209	3799	9.78543	0.0846903	1
KCNMA1	Pancreatic_Adenocarcinoma	7	110	5.98291	112	3799	3.11919	0.0848015	1
HNF1A	Gastric_Adenocarcinoma	7	423	1.62791	27	3571	0.87749	0.0848117	1
CBLB	Sarcoma	3	309	0.961538	96	3620	-1.62188	0.0849503	1
SETBP1	Thyroid_Carcinoma	2	11	15.3846	151	3864	11.6237	0.0850107	1
RPS6KB1	Colorectal_Adenocarcinoma	6	975	0.611621	41	3006	-0.733965	0.0851996	1
BCR	Colorectal_Adenocarcinoma	3	978	0.30581	27	3020	-0.580307	0.0852264	1
NFKBIA	Colorectal_Adenocarcinoma	3	978	0.30581	27	3020	-0.580307	0.0852264	1
CCND3	Pancreatic_Adenocarcinoma	2	115	1.7094	15	3896	1.32587	0.0856819	1
PTPRD	Prostate_Adenocarcinoma	7	52	11.8644	234	3735	5.96872	0.0857811	1
CCND2	Thymic_Carcinoma	1	19	5	17	3991	4.57585	0.0858742	1
FGF4	Thymic_Carcinoma	1	19	5	17	3991	4.57585	0.0858742	1
SMAD4	Prostate_Adenocarcinoma	1	58	1.69492	310	3659	-6.11562	0.0858749	1
NFKBIA	Ampullary_Carcinoma	1	11	8.33333	29	3987	7.61122	0.0859153	1
PNRC1	Adrenal_Carcinoma	1	29	3.33333	11	3987	3.0582	0.0859153	1
FANCI	Thyroid_Carcinoma	2	11	15.3846	152	3863	11.5988	0.0859737	1
POLQ	Gastric_Adenocarcinoma	15	415	3.48837	196	3402	-1.9591	0.0864647	1
KDM6A	Sarcoma	6	306	1.92308	145	3571	-1.97897	0.0866	1
SPEN	Pancreatic_Adenocarcinoma	3	114	2.5641	264	3647	-4.18609	0.0867388	1
HIF1A	Renal_Cell_Carcinoma	3	48	5.88235	80	3897	3.87079	0.0867828	1
UGT1A3	Thyroid_Carcinoma	1	12	7.69231	27	3988	7.01983	0.0868168	1
RAD50	Prostate_Adenocarcinoma	5	54	8.47458	157	3812	4.51892	0.0868632	1
MRE11A	Head_Neck_Carcinoma	10	216	4.42478	96	3706	1.89979	0.0868833	1
CRKL	Urothelial_Carcinoma	2	153	1.29032	11	3862	1.00631	0.0869403	1
SKP2	Head_Neck_Carcinoma	2	224	0.884956	7	3795	0.700842	0.086949	1
CYP2C19	Sarcoma	5	307	1.60256	26	3690	0.902887	0.0870102	1
FGF3	Sarcoma	5	307	1.60256	26	3690	0.902887	0.0870102	1
XRCC1	Gallbladder_Cancer	2	72	2.7027	25	3929	2.07043	0.0870369	1
EPHA6	Breast_Adenocarcinoma	35	567	5.81395	145	3281	1.58161	0.0871408	1
WHSC1L1	Urothelial_Carcinoma	4	151	2.58065	40	3833	1.54785	0.0872251	1
PTPN11	Cervical_Carcinoma	3	47	6	82	3896	3.93866	0.0875766	1
CDH5	Gastric_Adenocarcinoma	13	417	3.02326	63	3535	1.27228	0.0875871	1
ROS1	Cholangiocarcinoma	6	149	3.87097	303	3570	-3.95242	0.0879207	1
CIC	Sarcoma	10	302	3.20513	206	3510	-2.33847	0.0879706	1
CCNE1	Breast_Adenocarcinoma	16	586	2.65781	54	3372	1.08163	0.0879798	1
SMARCA4	Breast_Adenocarcinoma	22	580	3.65449	185	3241	-1.7454	0.0880137	1
KMT2D	Lung_Adenocarcinoma	31	179	14.7619	412	3406	3.97091	0.0880517	1
NSD1	Sarcoma	10	302	3.20513	207	3509	-2.36538	0.0882597	1
EP300	Pancreatic_Adenocarcinoma	3	114	2.5641	269	3642	-4.31393	0.0883271	1
APC	Renal_Cell_Carcinoma	6	45	11.7647	872	3105	-10.1614	0.0883726	1
CTCF	Urothelial_Carcinoma	5	150	3.22581	57	3816	1.75408	0.0885605	1
RBMXL1	Urothelial_Carcinoma	5	150	3.22581	57	3816	1.75408	0.0885605	1
USP9X	Lung_Adenocarcinoma	1	209	0.47619	86	3732	-1.7763	0.088973	1
CDK4	Endometrial_Carcinoma	2	45	4.25532	41	3940	3.22543	0.0889978	1
MDM4	Endometrial_Carcinoma	2	45	4.25532	41	3940	3.22543	0.0889978	1
RPS6KB1	Esophageal_Carcinoma	2	41	4.65116	45	3940	3.52193	0.0889978	1
FRS2	Breast_Adenocarcinoma	11	591	1.82724	34	3392	0.834832	0.0891585	1
GNAQ	Breast_Adenocarcinoma	11	591	1.82724	34	3392	0.834832	0.0891585	1
RAD51D	Breast_Adenocarcinoma	11	591	1.82724	34	3392	0.834832	0.0891585	1
ETV1	Sarcoma	2	310	0.641026	79	3637	-1.48492	0.0892085	1
AURKB	Others	2	76	2.5641	24	3926	1.95651	0.0892487	1
PAX3	Gastric_Adenocarcinoma	9	421	2.09302	38	3560	1.03688	0.0892747	1
NF1	Endometrial_Carcinoma	9	38	19.1489	422	3559	8.54858	0.0896272	1
CYP2A13	Endometrial_Carcinoma	1	46	2.12766	7	3974	1.95182	0.0896969	1
INSRR	Endometrial_Carcinoma	1	46	2.12766	7	3974	1.95182	0.0896969	1
MCL1	Thyroid_Carcinoma	1	12	7.69231	28	3987	6.99492	0.0897847	1
NOTCH3	Endometrial_Carcinoma	5	42	10.6383	201	3780	5.58932	0.0898127	1
NOTCH1	Cholangiocarcinoma	3	152	1.93548	203	3670	-3.30593	0.0899496	1
DICER1	Pancreatic_Adenocarcinoma	1	116	0.854701	157	3754	-3.15962	0.0899645	1
TP53BP1	Cholangiocarcinoma	1	154	0.645161	117	3756	-2.37575	0.0899854	1
TSC1	Pancreatic_Adenocarcinoma	1	116	0.854701	155	3756	-3.10848	0.0899935	1
RAC1	Colorectal_Adenocarcinoma	2	979	0.203874	21	3026	-0.485329	0.0899957	1
FLT4	Ovarian_Carcinoma	2	239	0.829876	100	3687	-1.81074	0.0900904	1
ITK	Breast_Adenocarcinoma	16	586	2.65781	55	3371	1.05244	0.0903813	1
PRKCB	Prostate_Adenocarcinoma	3	56	5.08475	70	3899	3.32108	0.0904156	1
MAML1	Thymic_Carcinoma	1	19	5	18	3990	4.5509	0.0904334	1
CDK4	Head_Neck_Carcinoma	5	221	2.21239	38	3764	1.21292	0.0904984	1
MAPK1	Head_Neck_Carcinoma	5	221	2.21239	38	3764	1.21292	0.0904984	1
KRAS	Cervical_Carcinoma	4	46	8	707	3271	-9.77275	0.0905451	1
RAD50	Breast_Adenocarcinoma	32	570	5.31561	130	3296	1.5211	0.0907312	1
SETBP1	Lung_Adenocarcinoma	13	197	6.19048	140	3678	2.52363	0.0907478	1
MED12	Pancreatic_Adenocarcinoma	2	115	1.7094	206	3705	-3.55779	0.0908117	1
MSH6	Thyroid_Carcinoma	2	11	15.3846	157	3858	11.4743	0.0908416	1
DOT1L	Others	5	73	6.41026	119	3831	3.3976	0.0908781	1
CDX2	Breast_Adenocarcinoma	4	598	0.664452	8	3418	0.430943	0.0909094	1
FGF12	Breast_Adenocarcinoma	4	598	0.664452	8	3418	0.430943	0.0909094	1
FGF5	Pancreatic_Adenocarcinoma	3	114	2.5641	34	3877	1.69476	0.09096	1
JAK2	Pancreatic_Adenocarcinoma	1	116	0.854701	162	3749	-3.28746	0.0909771	1
CYLD	Breast_Adenocarcinoma	9	593	1.49502	26	3400	0.736114	0.0910439	1
PMS2	Endometrial_Carcinoma	3	44	6.38298	89	3892	4.14736	0.0910787	1
FOXL2	Cervical_Carcinoma	2	48	4	39	3939	3.01961	0.0911855	1
HRAS	Cervical_Carcinoma	2	48	4	39	3939	3.01961	0.0911855	1
PHLPP2	Cervical_Carcinoma	2	48	4	39	3939	3.01961	0.0911855	1
SMARCA4	Endometrial_Carcinoma	5	42	10.6383	202	3779	5.5642	0.0912533	1
KLHL6	Neuroendocrine_Carcinoma	1	23	4.16667	15	3989	3.79204	0.0913514	1
MSH6	Cholangiocarcinoma	2	153	1.29032	157	3716	-2.76338	0.0913937	1
IGF1	Ampullary_Carcinoma	1	11	8.33333	31	3985	7.56142	0.091395	1
DOT1L	Cholangiocarcinoma	1	154	0.645161	123	3750	-2.53067	0.0915748	1
APOBEC3A	Colorectal_Adenocarcinoma	2	979	0.203874	22	3025	-0.518148	0.0915907	1
SDHC	Colorectal_Adenocarcinoma	2	979	0.203874	22	3025	-0.518148	0.0915907	1
RAD50	Cholangiocarcinoma	2	153	1.29032	160	3713	-2.84084	0.0920515	1
SMARCA1	Cholangiocarcinoma	2	153	1.29032	160	3713	-2.84084	0.0920515	1
KDM5A	Ampullary_Carcinoma	2	10	16.6667	172	3844	12.3838	0.092174	1
HGF	Cholangiocarcinoma	1	154	0.645161	124	3749	-2.55649	0.0922133	1
MSH2	Cholangiocarcinoma	1	154	0.645161	124	3749	-2.55649	0.0922133	1
KMT2A	Thyroid_Carcinoma	3	10	23.0769	340	3675	14.6087	0.0922983	1
TFRC	Gastric_Adenocarcinoma	11	419	2.55814	51	3547	1.14069	0.0923696	1
AREGB	Lung_Adenocarcinoma	2	208	0.952381	8	3810	0.742847	0.0923878	1
HIST1H3B	Lung_Adenocarcinoma	2	208	0.952381	8	3810	0.742847	0.0923878	1
WRN	Urothelial_Carcinoma	7	148	4.51613	87	3786	2.26981	0.0923911	1
USP9X	Cervical_Carcinoma	3	47	6	84	3894	3.88839	0.0924059	1
RUNX1	Adrenal_Carcinoma	2	28	6.66667	67	3931	4.99083	0.0925589	1
MPL	Endometrial_Carcinoma	2	45	4.25532	42	3939	3.20031	0.0925637	1
SMARCB1	Endometrial_Carcinoma	2	45	4.25532	42	3939	3.20031	0.0925637	1
GATA3	Others	4	74	5.12821	85	3865	2.97631	0.0926129	1
FANCF	Head_Neck_Carcinoma	4	222	1.76991	27	3775	1.05976	0.0926857	1
KMT2A	Prostate_Adenocarcinoma	9	50	15.2542	334	3635	6.83902	0.0927098	1
BRD3	Adrenal_Carcinoma	1	29	3.33333	12	3986	3.03318	0.0927436	1
RYR1	Adrenal_Carcinoma	1	29	3.33333	12	3986	3.03318	0.0927436	1
SMARCD1	Adrenal_Carcinoma	1	29	3.33333	12	3986	3.03318	0.0927436	1
UGT1A9	Thyroid_Carcinoma	1	12	7.69231	29	3986	6.97002	0.0927436	1
NCOR1	Urothelial_Carcinoma	15	140	9.67742	242	3631	3.42903	0.0927979	1
SRSF1	Hepatocellular_Carcinoma	1	38	2.5641	9	3980	2.33848	0.09281	1
SULT1E1	Hepatocellular_Carcinoma	1	38	2.5641	9	3980	2.33848	0.09281	1
UGT1A6	Hepatocellular_Carcinoma	1	38	2.5641	9	3980	2.33848	0.09281	1
TNKS	Thyroid_Carcinoma	2	11	15.3846	159	3856	11.4245	0.0928128	1
FLT1	Lung_Adenocarcinoma	13	197	6.19048	142	3676	2.47125	0.0928621	1
CBL	Cholangiocarcinoma	1	154	0.645161	125	3748	-2.58231	0.0929564	1
G6PD	Lung_Adenocarcinoma	3	207	1.42857	18	3800	0.95712	0.0930709	1
MSH2	Others	5	73	6.41026	120	3830	3.37228	0.0932919	1
IDH1	Prostate_Adenocarcinoma	3	56	5.08475	71	3898	3.29588	0.093293	1
USP9X	Neuroendocrine_Carcinoma	2	22	8.33333	85	3919	6.21046	0.0937068	1
FLI1	Ampullary_Carcinoma	1	11	8.33333	32	3984	7.53652	0.0941236	1
NFE2L2	Colorectal_Adenocarcinoma	14	967	1.42712	25	3022	0.606636	0.0942629	1
SOX2	Colorectal_Adenocarcinoma	14	967	1.42712	25	3022	0.606636	0.0942629	1
ERCC6-PGBD3	Renal_Cell_Carcinoma	2	49	3.92157	39	3938	2.94093	0.094314	1
PHLPP2	Renal_Cell_Carcinoma	2	49	3.92157	39	3938	2.94093	0.094314	1
PALB2	Head_Neck_Carcinoma	15	211	6.63717	162	3640	2.37625	0.0944484	1
PRRG1	Breast_Adenocarcinoma	0	602	0	17	3409	-0.496205	0.0944835	1
SLC3A2	Breast_Adenocarcinoma	0	602	0	17	3409	-0.496205	0.0944835	1
TP63	Breast_Adenocarcinoma	0	602	0	17	3409	-0.496205	0.0944835	1
TRRAP	Urothelial_Carcinoma	7	148	4.51613	88	3785	2.24399	0.0946162	1
TMPRSS2	Colorectal_Adenocarcinoma	5	976	0.509684	35	3012	-0.638987	0.0948286	1
PALB2	Ampullary_Carcinoma	2	10	16.6667	175	3841	12.3091	0.0949191	1
CEBPA	Thymic_Carcinoma	1	19	5	19	3989	4.52595	0.0949711	1
AREG	Cervical_Carcinoma	1	49	2	7	3971	1.82403	0.0951751	1
CTNNA1	Others	2	76	2.5641	25	3925	1.93119	0.0952183	1
SDHB	Others	2	76	2.5641	25	3925	1.93119	0.0952183	1
IDH2	Ovarian_Carcinoma	5	236	2.07469	36	3751	1.12407	0.0953147	1
PAK1	Ovarian_Carcinoma	5	236	2.07469	36	3751	1.12407	0.0953147	1
KCNMA1	Prostate_Adenocarcinoma	4	55	6.77966	115	3854	3.88221	0.0953392	1
PIK3R1	Head_Neck_Carcinoma	13	213	5.75221	133	3669	2.25405	0.0954041	1
BLM	Urothelial_Carcinoma	11	144	7.09677	157	3716	3.04307	0.0955781	1
ZBTB16	Lung_Adenocarcinoma	5	205	2.38095	42	3776	1.2809	0.0956483	1
RAF1	Endometrial_Carcinoma	3	44	6.38298	91	3890	4.09712	0.0956892	1
CDH2	Thymic_Carcinoma	2	18	10	104	3904	7.40519	0.0958898	1
MRE11A	Thymic_Carcinoma	2	18	10	104	3904	7.40519	0.0958898	1
MSH3	Endometrial_Carcinoma	4	43	8.51064	146	3835	4.84322	0.0959622	1
XPA	Breast_Adenocarcinoma	7	595	1.16279	19	3407	0.608208	0.0960132	1
AXIN2	Endometrial_Carcinoma	2	45	4.25532	43	3938	3.17519	0.0961713	1
FRS2	Endometrial_Carcinoma	2	45	4.25532	43	3938	3.17519	0.0961713	1
GNAQ	Endometrial_Carcinoma	2	45	4.25532	43	3938	3.17519	0.0961713	1
RAD51D	Endometrial_Carcinoma	2	45	4.25532	43	3938	3.17519	0.0961713	1
CBLB	Gastric_Adenocarcinoma	16	414	3.72093	83	3515	1.41409	0.0962932	1
SH2B3	Colorectal_Adenocarcinoma	9	972	0.917431	51	2996	-0.756346	0.0963721	1
PGR	Prostate_Adenocarcinoma	2	57	3.38983	34	3935	2.53319	0.0968121	1
B2M	Ampullary_Carcinoma	1	11	8.33333	33	3983	7.51162	0.0968446	1
PPP1R15A	Ampullary_Carcinoma	1	11	8.33333	33	3983	7.51162	0.0968446	1
UGT1A4	Sarcoma	2	310	0.641026	5	3711	0.506472	0.0968714	1
DICER1	Lung_Adenocarcinoma	13	197	6.19048	145	3673	2.39268	0.0968963	1
ETS1	Sarcoma	5	307	1.60256	27	3689	0.875976	0.0969253	1
KMT2D	Pancreatic_Adenocarcinoma	7	110	5.98291	436	3475	-5.16514	0.0969831	1
POLQ	Endometrial_Carcinoma	5	42	10.6383	206	3775	5.46372	0.0971376	1
DDR2	Thymic_Carcinoma	2	18	10	105	3903	7.38024	0.0974314	1
HSP90AA1	Thymic_Carcinoma	2	18	10	105	3903	7.38024	0.0974314	1
TNKS2	Head_Neck_Carcinoma	5	221	2.21239	39	3763	1.18661	0.0976849	1
AR	Cholangiocarcinoma	9	146	5.80645	384	3489	-4.10834	0.097699	1
BRD7	Gastric_Adenocarcinoma	9	421	2.09302	40	3558	0.981295	0.0978747	1
FAT3	Prostate_Adenocarcinoma	11	48	18.6441	454	3515	7.20542	0.0978943	1
FGFR1	Endometrial_Carcinoma	3	44	6.38298	92	3889	4.072	0.0980305	1
PKHD1	Thyroid_Carcinoma	3	10	23.0769	349	3666	14.3845	0.0980864	1
BCL2L2	Melanoma	1	58	1.69492	6	3963	1.54374	0.0982051	1
HNF1A	Lung_Adenocarcinoma	4	206	1.90476	30	3788	1.11901	0.0982308	1
AMER1	Renal_Cell_Carcinoma	2	49	3.92157	40	3937	2.91579	0.0982539	1
CYP2D6	Renal_Cell_Carcinoma	2	49	3.92157	40	3937	2.91579	0.0982539	1
MLLT3	Esophageal_Carcinoma	3	40	6.97674	101	3884	4.44224	0.0982646	1
ADNP	Breast_Adenocarcinoma	0	602	0	19	3407	-0.554583	0.098274	1
MYO1A	Breast_Adenocarcinoma	0	602	0	19	3407	-0.554583	0.098274	1
SLAMF1	Breast_Adenocarcinoma	0	602	0	19	3407	-0.554583	0.098274	1
NUTM1	Gallbladder_Cancer	2	72	2.7027	27	3927	2.01985	0.0983724	1
MAP2K1	Hepatocellular_Carcinoma	2	37	5.12821	53	3936	3.79955	0.0984689	1
GATA2	Urothelial_Carcinoma	3	152	1.93548	26	3847	1.26417	0.098535	1
ETS1	Thyroid_Carcinoma	1	12	7.69231	31	3984	6.9202	0.0986349	1
KAT6A	Endometrial_Carcinoma	5	42	10.6383	207	3774	5.4386	0.098639	1
TET2	Endometrial_Carcinoma	5	42	10.6383	207	3774	5.4386	0.098639	1
NT5C2	Colorectal_Adenocarcinoma	7	974	0.713558	44	3003	-0.730486	0.0987858	1
PLCG1	Ovarian_Carcinoma	13	228	5.39419	126	3661	2.06702	0.0988818	1
GATA1	Breast_Adenocarcinoma	9	593	1.49502	27	3399	0.706926	0.0988941	1
BRCA2	Ampullary_Carcinoma	3	9	25	381	3635	15.5129	0.0989308	1
GATA1	Gastric_Adenocarcinoma	7	423	1.62791	29	3569	0.821904	0.0991054	1
CIC	Urothelial_Carcinoma	13	142	8.3871	203	3670	3.14568	0.0991089	1
FGF18	Gastric_Adenocarcinoma	4	426	0.930233	13	3585	0.568921	0.0993999	1
PRRG1	Gastric_Adenocarcinoma	4	426	0.930233	13	3585	0.568921	0.0993999	1
FGF8	Adrenal_Carcinoma	1	29	3.33333	13	3985	3.00817	0.0995226	1
MITF	Lung_Adenocarcinoma	7	203	3.33333	65	3753	1.63087	0.0997245	1
PAK7	Lung_Adenocarcinoma	7	203	3.33333	65	3753	1.63087	0.0997245	1
JAK2	Sarcoma	7	305	2.24359	156	3560	-1.95447	0.0999057	1
SETD2	Cholangiocarcinoma	7	148	4.51613	326	3547	-3.90112	0.100009	1
PTCH1	Breast_Adenocarcinoma	26	576	4.31894	102	3324	1.3417	0.100043	1
DIS3	Thymic_Carcinoma	2	18	10	107	3901	7.33034	0.100537	1
FANCA	Head_Neck_Carcinoma	11	215	4.86726	108	3694	2.02665	0.100626	1
PTCH1	Lung_Adenocarcinoma	11	199	5.2381	117	3701	2.17366	0.100809	1
TP53	Urothelial_Carcinoma	85	70	54.8387	1852	2021	7.02048	0.100834	1
JAK3	Ovarian_Carcinoma	11	230	4.56432	101	3686	1.8973	0.10112	1
GSK3B	Others	2	76	2.5641	26	3924	1.90587	0.1013	1
SEMA3A	Others	2	76	2.5641	26	3924	1.90587	0.1013	1
IDH1	Breast_Adenocarcinoma	6	596	0.996678	68	3358	-0.988144	0.101359	1
GUCY1A2	Melanoma	2	57	3.38983	35	3934	2.508	0.101413	1
PPARG	Prostate_Adenocarcinoma	2	57	3.38983	35	3934	2.508	0.101413	1
IMPDH2	Lung_Adenocarcinoma	1	209	0.47619	1	3817	0.449999	0.101564	1
MIS18BP1	Lung_Adenocarcinoma	1	209	0.47619	1	3817	0.449999	0.101564	1
TNRC6A	Lung_Adenocarcinoma	1	209	0.47619	1	3817	0.449999	0.101564	1
ZNF646	Lung_Adenocarcinoma	1	209	0.47619	1	3817	0.449999	0.101564	1
FLI1	Thyroid_Carcinoma	1	12	7.69231	32	3983	6.8953	0.101567	1
PMS2	Head_Neck_Carcinoma	9	217	3.9823	83	3719	1.79924	0.101573	1
EPHA7	Renal_Cell_Carcinoma	4	47	7.84314	137	3840	4.39833	0.101609	1
KDM5A	Breast_Adenocarcinoma	34	568	5.64784	140	3286	1.56144	0.101928	1
MAP2K4	Thymic_Carcinoma	2	18	10	108	3900	7.30539	0.1021	1
EGF	Prostate_Adenocarcinoma	3	56	5.08475	74	3895	3.2203	0.102151	1
MAPK1	Renal_Cell_Carcinoma	2	49	3.92157	41	3936	2.89064	0.10224	1
PBRM1	Adrenal_Carcinoma	4	26	13.3333	238	3760	7.38036	0.102252	1
EIF1AX	Gastric_Adenocarcinoma	0	430	0	25	3573	-0.69483	0.102477	1
MAP3K13	Head_Neck_Carcinoma	11	215	4.86726	109	3693	2.00034	0.102562	1
PKHD1	Gastric_Adenocarcinoma	47	383	10.9302	305	3293	2.4533	0.103166	1
NKX2-1	Ovarian_Carcinoma	5	236	2.07469	37	3750	1.09766	0.103206	1
FLT3	Others	5	73	6.41026	124	3826	3.27102	0.103276	1
ABCC3	Lung_Adenocarcinoma	7	203	3.33333	66	3752	1.60468	0.103368	1
ETV6	Endometrial_Carcinoma	2	45	4.25532	45	3936	3.12495	0.103506	1
MYCN	Endometrial_Carcinoma	2	45	4.25532	45	3936	3.12495	0.103506	1
PAX3	Endometrial_Carcinoma	2	45	4.25532	45	3936	3.12495	0.103506	1
RPS6KB1	Endometrial_Carcinoma	2	45	4.25532	45	3936	3.12495	0.103506	1
ZBTB16	Endometrial_Carcinoma	2	45	4.25532	45	3936	3.12495	0.103506	1
FLT4	Gastric_Adenocarcinoma	16	414	3.72093	86	3512	1.33071	0.103541	1
PIK3CD	Breast_Adenocarcinoma	14	588	2.32558	48	3378	0.924531	0.103961	1
MYD88	Thymic_Carcinoma	1	19	5	21	3987	4.47605	0.103982	1
SF3A1	Thymic_Carcinoma	1	19	5	21	3987	4.47605	0.103982	1
HOXA3	Breast_Adenocarcinoma	3	599	0.498339	5	3421	0.352396	0.104101	1
ABCB1	Lung_Adenocarcinoma	9	201	4.28571	91	3727	1.90227	0.104215	1
GLI2	Lung_Adenocarcinoma	9	201	4.28571	91	3727	1.90227	0.104215	1
CDH20	Gastric_Adenocarcinoma	0	430	0	26	3572	-0.722624	0.104311	1
RBMXL1	Pancreatic_Adenocarcinoma	4	113	3.4188	58	3853	1.93581	0.104456	1
AREGB	Head_Neck_Carcinoma	2	224	0.884956	8	3794	0.67454	0.104789	1
SMAD3	Head_Neck_Carcinoma	2	224	0.884956	8	3794	0.67454	0.104789	1
U2AF2	Head_Neck_Carcinoma	2	224	0.884956	8	3794	0.67454	0.104789	1
MYC	Ampullary_Carcinoma	1	11	8.33333	36	3980	7.43692	0.104963	1
FLT1	Endometrial_Carcinoma	4	43	8.51064	151	3830	4.71762	0.105106	1
NCOA3	Breast_Adenocarcinoma	30	572	4.98339	123	3303	1.3932	0.105307	1
HLA-DRB1	Esophageal_Carcinoma	2	41	4.65116	50	3935	3.39646	0.105633	1
MAD1L1	Esophageal_Carcinoma	2	41	4.65116	50	3935	3.39646	0.105633	1
LRP6	Head_Neck_Carcinoma	16	210	7.07965	176	3626	2.4505	0.105685	1
RPTOR	Sarcoma	4	308	1.28205	107	3609	-1.59739	0.105859	1
CTNNB1	Neuroendocrine_Carcinoma	3	21	12.5	191	3813	7.72977	0.10605	1
PTPRD	Sarcoma	12	300	3.84615	229	3487	-2.31639	0.106076	1
MTOR	Sarcoma	12	300	3.84615	231	3485	-2.37021	0.106419	1
BCR	Urothelial_Carcinoma	3	152	1.93548	27	3846	1.23835	0.106538	1
UGT1A9	Urothelial_Carcinoma	3	152	1.93548	27	3846	1.23835	0.106538	1
GEN1	Adrenal_Carcinoma	2	28	6.66667	73	3925	4.84075	0.106563	1
RAF1	Head_Neck_Carcinoma	9	217	3.9823	85	3717	1.74664	0.10672	1
NPM1	Cervical_Carcinoma	2	48	4	43	3935	2.91905	0.106751	1
RAD51D	Cervical_Carcinoma	2	48	4	43	3935	2.91905	0.106751	1
CR1	Gastric_Adenocarcinoma	1	429	0.232558	0	3598	0.232558	0.106753	1
CYP2W1	Gastric_Adenocarcinoma	1	429	0.232558	0	3598	0.232558	0.106753	1
FAM111B	Gastric_Adenocarcinoma	1	429	0.232558	0	3598	0.232558	0.106753	1
GGH	Gastric_Adenocarcinoma	1	429	0.232558	0	3598	0.232558	0.106753	1
PHIP	Gastric_Adenocarcinoma	1	429	0.232558	0	3598	0.232558	0.106753	1
SELP	Gastric_Adenocarcinoma	1	429	0.232558	0	3598	0.232558	0.106753	1
SLC22A6	Gastric_Adenocarcinoma	1	429	0.232558	0	3598	0.232558	0.106753	1
TFAM	Gastric_Adenocarcinoma	1	429	0.232558	0	3598	0.232558	0.106753	1
SEMA3E	Colorectal_Adenocarcinoma	4	977	0.407747	30	3017	-0.576828	0.107251	1
SEMA3E	Sarcoma	0	312	0	34	3682	-0.914962	0.107392	1
TBX22	Sarcoma	0	312	0	34	3682	-0.914962	0.107392	1
TRRAP	Breast_Adenocarcinoma	20	582	3.32226	75	3351	1.13312	0.107407	1
ABCB1	Urothelial_Carcinoma	7	148	4.51613	93	3780	2.11489	0.107561	1
BCL2L11	Neuroendocrine_Carcinoma	1	23	4.16667	18	3986	3.71712	0.107565	1
MAML1	Neuroendocrine_Carcinoma	1	23	4.16667	18	3986	3.71712	0.107565	1
GUCY1A2	Gastric_Adenocarcinoma	7	423	1.62791	30	3568	0.79411	0.107651	1
JPH4	Colorectal_Adenocarcinoma	10	971	1.01937	16	3031	0.494261	0.107682	1
RICTOR	Cholangiocarcinoma	4	151	2.58065	219	3654	-3.07389	0.108033	1
PARP4	Ovarian_Carcinoma	11	230	4.56432	104	3683	1.81808	0.108111	1
PARP3	Sarcoma	0	312	0	35	3681	-0.941873	0.108156	1
GUCY1A2	Breast_Adenocarcinoma	9	593	1.49502	28	3398	0.677737	0.108184	1
LTK	Prostate_Adenocarcinoma	3	56	5.08475	76	3893	3.16991	0.108238	1
KAT6A	Gastric_Adenocarcinoma	30	400	6.97674	182	3416	1.91838	0.108378	1
SKP2	Renal_Cell_Carcinoma	1	50	1.96078	8	3969	1.75963	0.108451	1
RAC1	Thymic_Carcinoma	1	19	5	22	3986	4.4511	0.108455	1
BCL6	Urothelial_Carcinoma	5	150	3.22581	61	3812	1.6508	0.108549	1
FAM46C	Breast_Adenocarcinoma	2	600	0.332226	2	3424	0.273849	0.10872	1
LPL	Breast_Adenocarcinoma	2	600	0.332226	2	3424	0.273849	0.10872	1
PIK3CA	Endometrial_Carcinoma	12	35	25.5319	646	3335	9.30484	0.108783	1
PDGFRB	Gastric_Adenocarcinoma	14	416	3.25581	72	3526	1.2547	0.108794	1
CTNNA1	Breast_Adenocarcinoma	7	595	1.16279	20	3406	0.57902	0.108815	1
BCOR	Ampullary_Carcinoma	2	10	16.6667	190	3826	11.9356	0.109014	1
MET	Thyroid_Carcinoma	2	11	15.3846	175	3840	11.026	0.109045	1
PALB2	Thyroid_Carcinoma	2	11	15.3846	175	3840	11.026	0.109045	1
ERBB4	Hepatocellular_Carcinoma	0	39	0	272	3717	-6.81875	0.109045	1
FBXW7	Hepatocellular_Carcinoma	0	39	0	271	3718	-6.79368	0.109051	1
ERCC3	Esophageal_Carcinoma	2	41	4.65116	51	3934	3.37136	0.109057	1
TLR4	Head_Neck_Carcinoma	1	225	0.442478	1	3801	0.416176	0.10908	1
ARID2	Hepatocellular_Carcinoma	0	39	0	267	3722	-6.69341	0.109211	1
BRCA1	Hepatocellular_Carcinoma	0	39	0	277	3712	-6.9441	0.109215	1
SH2B3	Others	3	75	3.84615	57	3893	2.40312	0.109239	1
LATS1	Lung_Adenocarcinoma	9	201	4.28571	93	3725	1.84988	0.109307	1
KDM5A	Prostate_Adenocarcinoma	5	54	8.47458	169	3800	4.21658	0.109455	1
KMT2A	Head_Neck_Carcinoma	26	200	11.5044	317	3485	3.16671	0.109519	1
ARID2	Prostate_Adenocarcinoma	7	52	11.8644	260	3709	5.31364	0.109818	1
HSP90AA1	Gastric_Adenocarcinoma	6	424	1.39535	101	3497	-1.41177	0.110031	1
ABCB1	Endometrial_Carcinoma	3	44	6.38298	97	3884	3.9464	0.110085	1
GLI2	Endometrial_Carcinoma	3	44	6.38298	97	3884	3.9464	0.110085	1
CDKN2C	Gallbladder_Cancer	2	72	2.7027	29	3925	1.96927	0.110099	1
STK11	Gastric_Adenocarcinoma	11	419	2.55814	55	3543	1.02951	0.110107	1
EPHA3	Head_Neck_Carcinoma	16	210	7.07965	179	3623	2.3716	0.110144	1
BRCA2	Pancreatic_Adenocarcinoma	6	111	5.12821	378	3533	-4.53684	0.110172	1
PTPRD	Esophageal_Carcinoma	0	43	0	241	3744	-6.04768	0.110286	1
XRCC2	Thyroid_Carcinoma	1	12	7.69231	35	3980	6.82058	0.110312	1
SOX2	Ampullary_Carcinoma	1	11	8.33333	38	3978	7.38712	0.110338	1
MEN1	Renal_Cell_Carcinoma	2	49	3.92157	43	3934	2.84035	0.110345	1
RARA	Others	1	77	1.28205	5	3945	1.15547	0.110771	1
TOP2A	Endometrial_Carcinoma	4	43	8.51064	154	3827	4.64226	0.110781	1
ZBTB16	Head_Neck_Carcinoma	0	226	0	47	3755	-1.23619	0.110853	1
FGF6	Endometrial_Carcinoma	1	46	2.12766	9	3972	1.90159	0.110861	1
SDHD	Endometrial_Carcinoma	1	46	2.12766	9	3972	1.90159	0.110861	1
CTNNB1	Ampullary_Carcinoma	2	10	16.6667	192	3824	11.8858	0.110937	1
SLX4	Others	4	74	5.12821	91	3859	2.82441	0.110945	1
LMO1	Cholangiocarcinoma	1	154	0.645161	2	3871	0.593522	0.111083	1
P2RY12	Cholangiocarcinoma	1	154	0.645161	2	3871	0.593522	0.111083	1
ERBB3	Cholangiocarcinoma	11	144	7.09677	169	3704	2.73323	0.111085	1
AR	Adrenal_Carcinoma	0	30	0	393	3605	-9.82991	0.111178	1
HSP90AA1	Colorectal_Adenocarcinoma	19	962	1.9368	88	2959	-0.951287	0.111231	1
TOP2A	Adrenal_Carcinoma	3	27	10	155	3843	6.12306	0.11124	1
STAT3	Prostate_Adenocarcinoma	3	56	5.08475	77	3892	3.14471	0.111334	1
POLQ	Cervical_Carcinoma	0	50	0	211	3767	-5.30417	0.111344	1
EGF	Adrenal_Carcinoma	2	28	6.66667	75	3923	4.79073	0.111355	1
VCP	Cholangiocarcinoma	2	153	1.29032	13	3860	0.954665	0.11139	1
AREG	Prostate_Adenocarcinoma	1	58	1.69492	7	3962	1.51855	0.111437	1
GNA13	Prostate_Adenocarcinoma	1	58	1.69492	7	3962	1.51855	0.111437	1
HOXA3	Melanoma	1	58	1.69492	7	3962	1.51855	0.111437	1
INHBA	Melanoma	1	58	1.69492	7	3962	1.51855	0.111437	1
TET2	Sarcoma	10	302	3.20513	202	3514	-2.23082	0.111451	1
NOTCH1	Renal_Cell_Carcinoma	0	51	0	206	3771	-5.17978	0.11151	1
ARID1A	Head_Neck_Carcinoma	19	207	8.40708	457	3345	-3.61291	0.111515	1
PIK3R1	Renal_Cell_Carcinoma	4	47	7.84314	142	3835	4.27261	0.111815	1
FANCE	Colorectal_Adenocarcinoma	6	975	0.611621	38	3009	-0.635508	0.112014	1
WHSC1L1	Colorectal_Adenocarcinoma	6	975	0.611621	38	3009	-0.635508	0.112014	1
FAT3	Breast_Adenocarcinoma	81	521	13.4551	384	3042	2.24674	0.112093	1
FGF5	Sarcoma	0	312	0	37	3679	-0.995694	0.112153	1
GUCY1A2	Sarcoma	0	312	0	37	3679	-0.995694	0.112153	1
ERBB3	Thyroid_Carcinoma	2	11	15.3846	178	3837	10.9512	0.112175	1
KMT2D	Cervical_Carcinoma	9	41	18	434	3544	7.08999	0.11239	1
ERBB3	Prostate_Adenocarcinoma	0	59	0	180	3789	-4.53515	0.112445	1
ERBB3	Melanoma	0	59	0	180	3789	-4.53515	0.112445	1
MET	Melanoma	0	59	0	177	3792	-4.45956	0.112495	1
JAK1	Sarcoma	6	306	1.92308	139	3577	-1.8175	0.112592	1
BCORL1	Ovarian_Carcinoma	14	227	5.80913	138	3649	2.16508	0.112656	1
STAT4	Cervical_Carcinoma	3	47	6	92	3886	3.68728	0.112794	1
MSH6	Adrenal_Carcinoma	3	27	10	156	3842	6.09805	0.112826	1
APOBEC3A	Thymic_Carcinoma	1	19	5	23	3985	4.42615	0.112907	1
GPR124	Thymic_Carcinoma	1	19	5	23	3985	4.42615	0.112907	1
TMPRSS2	Ampullary_Carcinoma	1	11	8.33333	39	3977	7.36222	0.113014	1
MET	Sarcoma	8	304	2.5641	169	3547	-1.9838	0.113151	1
MYC	Thyroid_Carcinoma	1	12	7.69231	36	3979	6.79567	0.113209	1
PPARG	Thyroid_Carcinoma	1	12	7.69231	36	3979	6.79567	0.113209	1
TP53	Gastric_Adenocarcinoma	191	239	44.4186	1746	1852	-4.10835	0.113448	1
JAK1	Gallbladder_Cancer	0	74	0	145	3809	-3.66717	0.113575	1
PIK3R1	Gallbladder_Cancer	0	74	0	146	3808	-3.69246	0.113717	1
PHF6	Others	2	76	2.5641	28	3922	1.85524	0.113773	1
ERCC1	Ovarian_Carcinoma	3	238	1.24481	17	3770	0.795909	0.113786	1
RPTOR	Esophageal_Carcinoma	3	40	6.97674	108	3877	4.26658	0.113816	1
MAP3K1	Sarcoma	8	304	2.5641	171	3545	-2.03762	0.113821	1
AXL	Pancreatic_Adenocarcinoma	0	117	0	89	3822	-2.27563	0.113913	1
ATR	Lung_Adenocarcinoma	23	187	10.9524	297	3521	3.17344	0.113977	1
JAK2	Head_Neck_Carcinoma	14	212	6.19469	149	3653	2.2757	0.113998	1
SUFU	Breast_Adenocarcinoma	6	596	0.996678	15	3411	0.558849	0.114112	1
ROS1	Breast_Adenocarcinoma	56	546	9.30233	253	3173	1.91762	0.114176	1
SF3B1	Sarcoma	6	306	1.92308	142	3574	-1.89824	0.114365	1
CBFB	Lung_Adenocarcinoma	0	210	0	54	3764	-1.41435	0.114428	1
CHD2	Lung_Adenocarcinoma	0	210	0	54	3764	-1.41435	0.114428	1
HGF	Head_Neck_Carcinoma	11	215	4.86726	114	3688	1.86883	0.114625	1
CDKN2C	Urothelial_Carcinoma	3	152	1.93548	28	3845	1.21253	0.114786	1
ETV6	Cervical_Carcinoma	2	48	4	45	3933	2.86878	0.114787	1
RPS6KB1	Cervical_Carcinoma	2	48	4	45	3933	2.86878	0.114787	1
ATM	Endometrial_Carcinoma	9	38	19.1489	467	3514	7.41822	0.114789	1
FGFR2	Thymic_Carcinoma	2	18	10	116	3892	7.10579	0.114856	1
STK11	Breast_Adenocarcinoma	5	597	0.830565	61	3365	-0.949937	0.114947	1
TNFAIP3	Cholangiocarcinoma	0	155	0	72	3801	-1.85902	0.114951	1
CD79A	Lung_Adenocarcinoma	3	207	1.42857	20	3798	0.904737	0.115016	1
ERCC6	Endometrial_Carcinoma	3	44	6.38298	99	3882	3.89617	0.115063	1
IRS2	Endometrial_Carcinoma	3	44	6.38298	99	3882	3.89617	0.115063	1
EP300	Esophageal_Carcinoma	0	43	0	272	3713	-6.8256	0.115208	1
TOP1	Sarcoma	3	309	0.961538	89	3627	-1.43351	0.115212	1
BTK	Sarcoma	0	312	0	38	3678	-1.0226	0.115332	1
CDKN1B	Sarcoma	0	312	0	38	3678	-1.0226	0.115332	1
ZNRF3	Head_Neck_Carcinoma	0	226	0	51	3751	-1.3414	0.115338	1
RAD21	Lung_Adenocarcinoma	7	203	3.33333	69	3749	1.5261	0.115583	1
TTF1	Lung_Adenocarcinoma	7	203	3.33333	69	3749	1.5261	0.115583	1
MAP2K2	Ampullary_Carcinoma	1	11	8.33333	40	3976	7.33732	0.115683	1
RAF1	Sarcoma	3	309	0.961538	91	3625	-1.48733	0.115858	1
FANCC	Cholangiocarcinoma	0	155	0	73	3800	-1.88484	0.115913	1
NCOA3	Gallbladder_Cancer	0	74	0	153	3801	-3.8695	0.11601	1
SF3B1	Renal_Cell_Carcinoma	4	47	7.84314	144	3833	4.22232	0.116024	1
ABCB11	Ovarian_Carcinoma	1	240	0.414938	1	3786	0.388532	0.116097	1
AGTR1	Ovarian_Carcinoma	1	240	0.414938	1	3786	0.388532	0.116097	1
BTG1	Ovarian_Carcinoma	1	240	0.414938	1	3786	0.388532	0.116097	1
C18orf21	Ovarian_Carcinoma	1	240	0.414938	1	3786	0.388532	0.116097	1
MIS18BP1	Ovarian_Carcinoma	1	240	0.414938	1	3786	0.388532	0.116097	1
NPPA	Ovarian_Carcinoma	1	240	0.414938	1	3786	0.388532	0.116097	1
PON1	Ovarian_Carcinoma	1	240	0.414938	1	3786	0.388532	0.116097	1
REV3L	Ovarian_Carcinoma	1	240	0.414938	1	3786	0.388532	0.116097	1
SLC22A12	Ovarian_Carcinoma	1	240	0.414938	1	3786	0.388532	0.116097	1
SLC22A16	Ovarian_Carcinoma	1	240	0.414938	1	3786	0.388532	0.116097	1
SLC2A9	Ovarian_Carcinoma	1	240	0.414938	1	3786	0.388532	0.116097	1
CBLB	Neuroendocrine_Carcinoma	2	22	8.33333	97	3907	5.91076	0.116443	1
TRAF7	Breast_Adenocarcinoma	4	598	0.664452	9	3417	0.401755	0.116451	1
TP53BP1	Ovarian_Carcinoma	11	230	4.56432	107	3680	1.73886	0.116705	1
AREGB	Ovarian_Carcinoma	2	239	0.829876	8	3779	0.618627	0.116844	1
SYK	Breast_Adenocarcinoma	15	587	2.49169	52	3374	0.973889	0.116874	1
EIF2B3	Colorectal_Adenocarcinoma	8	973	0.815494	12	3035	0.421664	0.116918	1
FOXA1	Cholangiocarcinoma	0	155	0	74	3799	-1.91066	0.11707	1
PARP1	Cholangiocarcinoma	0	155	0	74	3799	-1.91066	0.11707	1
CDKN1B	Gastric_Adenocarcinoma	7	423	1.62791	31	3567	0.766317	0.117086	1
RUNX1T1	Thymic_Carcinoma	1	19	5	24	3984	4.4012	0.117338	1
BRIP1	Thyroid_Carcinoma	2	11	15.3846	183	3832	10.8267	0.117448	1
HDAC2	Ovarian_Carcinoma	0	241	0	49	3738	-1.2939	0.11757	1
BRD7	Urothelial_Carcinoma	4	151	2.58065	45	3828	1.41876	0.117882	1
UGT1A8	Urothelial_Carcinoma	4	151	2.58065	45	3828	1.41876	0.117882	1
FANCL	Gastric_Adenocarcinoma	2	428	0.465116	52	3546	-0.980131	0.118036	1
XPO1	Breast_Adenocarcinoma	10	592	1.66113	31	3395	0.756284	0.118089	1
PIK3CG	Thymic_Carcinoma	2	18	10	118	3890	7.05589	0.11811	1
SUFU	Neuroendocrine_Carcinoma	1	23	4.16667	20	3984	3.66717	0.118219	1
UGT1A5	Neuroendocrine_Carcinoma	1	23	4.16667	20	3984	3.66717	0.118219	1
ACVR2A	Ampullary_Carcinoma	1	11	8.33333	41	3975	7.31242	0.118345	1
CYP2D6	Ampullary_Carcinoma	1	11	8.33333	41	3975	7.31242	0.118345	1
NKX2-1	Ampullary_Carcinoma	1	11	8.33333	41	3975	7.31242	0.118345	1
DPYD	Gastric_Adenocarcinoma	20	410	4.65116	115	3483	1.45494	0.11839	1
NFE2L2	Gastric_Adenocarcinoma	1	429	0.232558	38	3560	-0.823584	0.118396	1
ERCC4	Cholangiocarcinoma	0	155	0	75	3798	-1.93648	0.118419	1
SMARCA1	Endometrial_Carcinoma	4	43	8.51064	158	3823	4.54179	0.118562	1
RELA	Gastric_Adenocarcinoma	6	424	1.39535	23	3575	0.756105	0.118855	1
TNFAIP3	Gastric_Adenocarcinoma	12	418	2.7907	60	3538	1.1231	0.119216	1
MTOR	Urothelial_Carcinoma	14	141	9.03226	229	3644	3.11953	0.119283	1
BACH1	Ovarian_Carcinoma	9	232	3.73444	83	3704	1.54273	0.119403	1
CCND3	Adrenal_Carcinoma	1	29	3.33333	16	3982	2.93313	0.119567	1
SULT1E1	Renal_Cell_Carcinoma	1	50	1.96078	9	3968	1.73448	0.119764	1
UGT1A6	Renal_Cell_Carcinoma	1	50	1.96078	9	3968	1.73448	0.119764	1
BRCA2	Thyroid_Carcinoma	3	10	23.0769	381	3634	13.5875	0.119911	1
RAD21	Cholangiocarcinoma	0	155	0	76	3797	-1.9623	0.119955	1
BCOR	Cholangiocarcinoma	3	152	1.93548	189	3684	-2.94445	0.120066	1
[truncated: 16,793 more rows]
